1 **Hepatic miR-20b promotes nonalcoholic fatty liver disease by**  
2 **suppressing PPAR $\alpha$**

3

4 **Yo Han Lee<sup>1,5</sup>, Hyun-Jun Jang<sup>1,5</sup>, Soukoku Kim<sup>1,5</sup>, Sun Sil Choi<sup>1</sup>, Keon Woo**  
5 **Khim<sup>1</sup>, Hye-Jin Eom<sup>1</sup>, Jimin Hyun<sup>1</sup>, Kyeong Jin Shin<sup>1</sup>, Young Chan Chae<sup>1</sup>,**  
6 **Hongtae Kim<sup>1</sup>, Jiyoung Park<sup>1</sup>, Neung Hwa Park<sup>2</sup>, Chang-Yun Woo<sup>3</sup>, Chung**  
7 **Hwan Hong<sup>4</sup>, Eun Hee Koh<sup>3</sup>, Dougu Nam<sup>1,\*</sup>, Jang Hyun Choi<sup>1,\*</sup>**

8 <sup>1</sup>Department of Biological Sciences, Ulsan National Institute of Science and Technology  
9 (UNIST), Ulsan, 44919, Republic of Korea

10 <sup>2</sup>Department of Internal Medicine, University of Ulsan College of Medicine, Ulsan University  
11 Hospital, Ulsan, 44033, Republic of Korea

12 <sup>3</sup>Department of Internal Medicine, Asan Medical Center, University of Ulsan College of  
13 Medicine, Seoul, 05505, Republic of Korea

14 <sup>4</sup>Department of Medical Science, Asan Medical Center, University of Ulsan College of  
15 Medicine, Seoul, 05505, Republic of Korea.

16 <sup>5</sup>These authors contributed equally to this work.

17

18 **\* Corresponding Author**

19 **Dougu Nam**, Department of Biological Sciences, Ulsan National Institute of Science and  
20 Technology (UNIST), Ulsan, Republic of Korea. Tel.: +82 52 217 2525; Fax: +82 52 217  
21 2639

22 E-mail: dougnam@unist.ac.kr (D. Nam)

23 **Jang Hyun Choi**, Department of Biological Sciences, Ulsan National Institute of Science  
24 and Technology (UNIST), Ulsan, Republic of Korea. Tel.: +82 52 217 2543; Fax: +82 52 217  
25 3219

26 E-mail: janghchoi@unist.ac.kr (J.H. Choi)

27

28 **Abstract**

29 Background:

30 Non-alcoholic fatty liver disease (NAFLD) is associated with hepatic metabolic reprogramming that  
31 leads to excessive lipid accumulation and imbalances in lipid metabolism in the liver. Although nuclear  
32 receptors (NRs) play a crucial role in hepatic metabolic reprogramming, the underlying mechanisms  
33 of NR regulation in NAFLD remain largely unclear.

34

35 Methods:

36 Using network analysis and RNA-seq to determine the correlation between NRs and microRNA in  
37 NAFLD patients, we revealed that miR-20b specifically targets PPAR $\alpha$ . miR-20b mimic and anti-miR-  
38 20b were administered to hepatocytes as well as high fat diet (HFD)- or methionine-deficient diet  
39 (MCD)-fed mice to verify the specific function of miR-20b in NAFLD. We tested the inhibition of the  
40 therapeutic effect of a PPAR $\alpha$  agonist, fenofibrate, by miR-20b.

41

42 Results:

43 We revealed that miR-20b specifically targets PPAR $\alpha$  through miRNA regulatory network analysis of  
44 nuclear receptor genes in NAFLD. The expression of miR-20b was upregulated in free fatty acid (FA)-  
45 treated hepatocytes and the livers of both obesity-induced mice and NAFLD patients. Overexpression  
46 of miR-20b significantly increased hepatic lipid accumulation and triglyceride levels. Furthermore,  
47 miR-20b significantly reduced FA oxidation and mitochondrial biogenesis by targeting PPAR $\alpha$ . In miR-  
48 20b-introduced mice, the effect of fenofibrate to ameliorate hepatic steatosis was significantly  
49 suppressed. Finally, inhibition of miR-20b significantly increased FA oxidation and uptake, resulting in  
50 improved insulin sensitivity and a decrease in NAFLD progression.

51

52 Conclusions:

53 Taken together, our results demonstrate that the novel miR-20b targets PPAR $\alpha$ , plays a significant  
54 role in hepatic lipid metabolism, and present an opportunity for the development of novel therapeutics  
55 for NAFLD.

56

57 Funding:

58 This research was funded by Korea Mouse Phenotyping Project (2016M3A9D5A01952411), the  
59 National Research Foundation of Korea (NRF) grant funded by the Korea government  
60 (2020R1F1A1061267, 2018R1A5A1024340), the Future-leading Project Research Fund (1.210034.01)  
61 of UNIST and the National Research Foundation of Korea (NRF) grant funded by the Korea  
62 government (2020R111A1A01074940).

63

## 64 **Introduction**

65 Obesity has emerged as a host of metabolic disorders, such as non-alcoholic fatty liver disease  
66 (NAFLD). Many reports have demonstrated that 90% of obese patients in the United States have  
67 NAFLD ranging from hepatic steatosis to much more severe forms of non-alcoholic steatohepatitis  
68 (NASH), which can induce fibrosis, cirrhosis, and hepatocellular carcinoma (HCC)(Corey & Kaplan,  
69 2014). NAFLD is associated with hepatic metabolic reprogramming that leads to excessive lipid  
70 accumulation and imbalances in lipid metabolism in the liver(de Alwis & Day, 2008). Hepatic lipid  
71 homeostasis is appropriately described as a complex machinery involving signaling and  
72 transcriptional pathways, as well as targeted genes associated with fatty acid (FA) oxidation and  
73 lipogenesis(Fabbrini, Sullivan, & Klein, 2010). Although the pathogenesis of NAFLD has been widely  
74 studied for years, the molecular mechanisms underlying its complicated disorder are still being  
75 investigated.

76 Nuclear receptors (NRs) are a superfamily of ligand-activated transcription factors that regulate  
77 biological homeostasis(McKenna et al., 2009). Recent evidence suggests that NRs are key regulators  
78 in the progression of diverse hepatic diseases associated with glucose and lipid metabolism,  
79 inflammation, bile acid homeostasis, fibrosis, and cancer development in the liver(Lopez-Velazquez,  
80 Carrillo-Cordova, Chavez-Tapia, Uribe, & Mendez-Sanchez, 2012). Among them, growing evidence  
81 suggests a link between PPAR $\alpha$  and obesity-induced NAFLD. Hepatic PPAR $\alpha$  plays an important role  
82 in energy homeostasis by regulating the expression of genes required for FA uptake, FA oxidation,  
83 and triglyceride (TG) hydrolysis in the liver(Chakravarthy et al., 2005). The decreased expression of  
84 PPAR $\alpha$  is significantly associated with severity in NAFLD patients(Francque et al., 2015). Therefore,  
85 understanding the molecular mechanism underlying PPAR $\alpha$  regulation is critical for understanding the  
86 pathogenesis of NAFLD.

87 MicroRNAs (miRNAs) are short, non-coding RNA molecules with a length of 18-25 nucleotides that  
88 play an important role in regulating the expression of target genes in a post-transcriptional manner by  
89 targeting base-pairing with the 3'-UTR of specific target mRNAs, inhibiting translation, or mRNA  
90 degradation(Bartel, 2004). These miRNAs contribute to the regulation of a wide variety of cellular  
91 functions and metabolic homeostasis, including fatty acid metabolism. Recent studies have suggested  
92 that miRNAs significantly regulate the pathogenesis of NAFLD by targeting the nuclear  
93 receptors(Lopez-Sanchez, Dominguez-Perez, Uribe, Chavez-Tapia, & Nuno-Lambarri, 2021).  
94 Previous report has demonstrated that miR-20b, a member of the miR-17 family, presents in the  
95 circulating plasma of NAFLD patients and has been highlighted as a novel biomarker of NAFLD and  
96 type 2 diabetes mellitus (T2DM) for the diagnosis and risk estimation of NAFLD(Ye et al., 2018).  
97 However, the mechanisms underlying the involvement of miR-20b in the occurrence and progression  
98 of NAFLD remain unknown. In this study, we analyzed the regulatory networks of miRNAs for NR  
99 genes and RNA-seq data in NAFLD patients, which prioritized miR-20b as a key regulator of NAFLD.  
100 miR-20b suppressed FA  $\beta$ -oxidation and FA uptake, which led to the regulation of mitochondrial  
101 biogenesis in both liver cells and tissues by targeting PPAR $\alpha$ . Furthermore, we confirmed that the  
102 inhibition of miR-20b ameliorates NAFLD progression. These results suggest that miR-20b plays a  
103 critical role in regulating lipid metabolism in the liver and may provide a promising target for  
104 therapeutic strategies in the development of NAFLD.

105

## 106 **Results**

### 107 **miR-20b significantly increases in the livers of dietary obese mice and human.**

108 We constructed a regulatory network of NRs that were differentially expressed in NAFLD  
109 patients(Hoang et al., 2019) and microRNA targeting NRs based on miRNA target prediction(Agarwal,  
110 Bell, Nam, & Bartel, 2015), to identify the correlation between NR and microRNA in the development  
111 of NAFLD. As shown in Figure 1A, the top ten miRNAs were found to be highly correlated with the  
112 modulation of NR expression in NAFLD. To further prioritize key miRNAs, we assessed the  
113 expression levels of miRNAs in NAFLD patients compared to those in normal individuals using public  
114 GSE data (GSE40744). Among the selected miRNAs, miR-20b expression was predominantly  
115 increased in NAFLD patients compared to that in normal individuals (adjusted  $p$ -value = 0.008)  
116 (Figure 1B). Next, to validate the importance of miR-20b in NAFLD, we assessed the expression of



117 miR-20b in histological NASH, simple steatosis, and normal patient samples (Figure 1C, Figure 1-  
118 figure supplement 1). The expression of miR-20b was significantly increased in simple steatosis and  
119 NASH compared to that in normal individuals, and the extent of increase in NASH was higher than  
120 that in simple steatosis.

121 miR-20b expression was increased in both oleic acid (OA)-treated HepG2 and Huh-7 cells (Figure  
122 1D, E). Moreover, the expression of miR-20b was significantly upregulated in the fatty livers of high-  
123 fat diet (HFD)-fed mice, *ob/ob* mice, and methionine-deficient diet (MCD)-fed mice compared to that in  
124 the liver of normal chow diet (NCD)-fed wild mice (Figure 1F-H). Together, our results indicate that  
125 miR-20b expression is increased in NAFLD and is highly associated with the regulation of NRs in  
126 NAFLD.

127

#### 128 **PPAR $\alpha$ is a direct target of miR-20b.**

129 Next, we characterized the physiological roles of miR-20b in NAFLD. Oil Red O staining showed  
130 that miR-20b expression increased intracellular lipid content, and this lipid accumulation was  
131 increased with OA treatment in HepG2 cells (Figure 2A). As expected, overexpression of miR-20b  
132 significantly upregulated TG content and cholesterol in OA-treated HepG2 cells (Figure 2B, C). To  
133 further investigate the functions and targets of miR-20b, HepG2 cells were transfected with miR-20b  
134 and two separate RNA-Seq libraries of non-targeting control (miR-NC) and forced miR-20b  
135 expression (miR-20b) were constructed. The six RNA-seq samples were clearly separated between  
136 the forced miR-20b expression and control conditions, implying a significant impact on gene  
137 expression in HepG2 cells (Figure 2D, Figure 2-figure supplement 1A). The NR metapathway was  
138 detected as the most significant pathways (adjusted  $p$ -value = 2.47-E8) by the gene-set enrichment  
139 analysis (GSEA) (Subramanian et al., 2005), indicating that NRs and related genes are the major  
140 targets of miR-20b (Figure 2E, F). The heatmap of RNA-seq data for the NR transcription pathway is  
141 shown in Figure 2G. Five NRs (*PPARA*, *RORA*, *RORC*, *THRB*, and *NRBP1*) were downregulated  
142 (adjusted  $p$ -value  $\leq 0.05$ ), and *PPARA* was the most significantly downregulated NR (adjusted  $p$ -  
143 value = 3.25-E5). Furthermore, GSEA showed that *PPARA* pathways and PPAR signaling pathways  
144 were significantly decreased in miR-20b overexpressed cells (Figure 2-figure supplement 1B, C). We  
145 validated the expression of these NRs and the *PPARA*, *RORC*, *THRB*, and *NRBP1* expression was

146 decreased by miR-20b in human liver cells and mouse primary hepatocytes. Consistent with the RNA-  
147 seq data, the expression change of *PPARA* at both the protein and mRNA levels with miR-20b  
148 transfection was the most distinct compared to the control (Figure 2H, I). Moreover, among candidate  
149 targets, only *PPARA* was selected as an overlapped predicted target of miR-20b between various  
150 miRNA target prediction programs, including miRDB, picTAR, TargetSCAN, and miRmap (Figure 2J,  
151 Figure 2-figure supplement 2). Notably, the 3'-UTR of *PPARA* mRNA includes miR-20b binding sites  
152 that are well conserved between humans and mice, suggesting that miR-20b may have a direct  
153 inhibitory effect on PPAR $\alpha$  expression (Figure 2K). Using a luciferase reporter construct including the  
154 3'-UTR of *PPARA*, we revealed that miR-20b suppressed the luciferase activity in both HepG2 and  
155 Huh-7 cells in a dose-dependent manner. Furthermore, we built the mutant construct of the predicted  
156 miR-20b binding sites within the 3'-UTR of *PPARA*; the inhibitory effect of miR-20b on luciferase  
157 activity was completely blunted (Figure 2L, M). Taken together, these results indicate that miR-20b  
158 inhibits the expression of PPAR $\alpha$  by interacting with its 3'-UTR.

159

#### 160 **miR-20b regulates fatty acid metabolism.**

161 Since PPAR $\alpha$ , the target of miR-20b, is a master regulator of lipid metabolism such as FA utilization  
162 and oxidation, and decreased in diverse diet-induced NAFLD conditions (Figure 3-figure supplement  
163 1), we investigated the effects of miR-20b on lipid metabolism to reveal the functional contribution of  
164 increased miR-20b to NAFLD. The mRNA levels of genes involved in FA  $\beta$ -oxidation and FA uptake,  
165 including *CPT1A*, *ACOX1*, *CD36*, and *FABP1*, were decreased by overexpression of miR-20b  
166 compared to the control in HepG2 cells and primary hepatocytes (Figure 3A-C and Figure 3-figure  
167 supplement 2A-F), whereas the genes associated with lipogenesis and ketogenesis were not affected  
168 by miR-20b (Figure 3D, Figure 3-figure supplement 2G and Figure 3-figure supplement 3A,B). miR-  
169 20b overexpressed HepG2 cells showed reduced levels of palmitoyl-carnitine, a substrate of  $\beta$ -  
170 oxidation, and acetyl-CoA, a product of  $\beta$ -oxidation. Subsequently, TCA cycle intermediate levels,  
171 including citrate and succinate, also decreased (Figure 3E).

172 Enforced expression of miR-20b in HepG2 cells under both basal and OA treatments decreased the  
173 expression of *PPARGC1A* and *SIRT1*, which are involved in mitochondrial biogenesis (Figure 3F).  
174 The copy number of two mtDNA genes, *VIPR1* and *MT-ATP6*, was decreased by miR-20b  
175 overexpression following OA treatment (Figure 3G). Consistently, mitochondrial function that was

176 analyzed *via* OCR (oxygen consumption rate) was reduced by miR-20b under both basal and OA  
177 treatment conditions compared to the control (Figure 3H). In particular, the basal respiration and  
178 maximal respiratory capacity were significantly suppressed by miR-20b (Figure 3I). Furthermore, the  
179 level of ATP production, FA uptake, and FA oxidation was reduced in miR-20b overexpressed cells  
180 compared with that in the control under both basal and OA-treated conditions (Figure 3J-L).

181 To further clarify the role of miR-20b in hepatic steatosis, miR-20b inhibitor (anti-miR-20b), which  
182 silences miR-20b, was delivered into HepG2 cells and primary hepatocytes with OA treatment (Figure  
183 3M, Figure 3-figure supplement 4G). Oil red O staining showed that anti-miR-20b remarkably  
184 decreased intracellular lipid accumulation upon OA treatment (Figure 3-figure supplement 4G A, D).  
185 As expected, miR-20b inhibition reduced the levels of TG and cholesterol both under basal and OA  
186 conditions compared to the control (Figure 3-figure supplement 4G B, C, E, and F). Lipid  
187 consumption-associated genes, not lipogenic genes, were significantly upregulated in miR-20b  
188 inhibited HepG2 cells and primary hepatocytes compared to those in the control under both basal and  
189 OA conditions (Figure 3N-P and Figure 3-figure supplement 4H-J). Inhibition of miR-20b increased  
190 the levels of palmitoyl-carnitine, acetyl-CoA, and TCA cycle intermediates (Figure 3Q), whereas  
191 ketogenesis was not affected (Figure 3-figure supplement 4C and D). Furthermore, the expression of  
192 mitochondrial biogenesis genes (Figure 3R) and the copy number of mitochondrial DNA genes were  
193 increased in both basal and OA conditions (Figure 3S). Consequently, anti-miR-20b treatment  
194 significantly upregulated the mitochondrial activity, FA uptake, and FA oxidation (Figure 3T-X). Taken  
195 together, these results demonstrated that miR-20b contributes to hepatic steatosis by controlling lipid  
196 oxidation and mitochondrial function through changes in gene expression, further contributing to the  
197 progression of NAFLD.

198

### 199 **miR-20b promotes hepatic steatosis in HFD-fed mice**

200 To confirm the *in vivo* roles of miR-20b in obesity model mice, we introduced miR-20b using an  
201 adenovirus-associated vector (AAV), referred to as AAV-miR-20b, into C57BL/6 mice that had been  
202 fed a normal chow diet (NCD) or a high-fat diet (HFD). Administration of AAV-miR-20b led to high  
203 expression levels of miR-20b in the livers of NCD- and HFD-fed mice compared to AAV-Control  
204 injection (Figure 4A). However, the expression level of miR-20b was not changed in peripheral tissues

205 including white and brown adipose tissues except in muscle (Katayama et al., 2019) (Figure 4-figure  
206 supplement 1). Consequently, AAV-miR-20b injected mice exhibited a reduction in the PPAR $\alpha$  protein  
207 levels compared with AAV-Control injected mice on both NCD and HFD (Figure 4B).

208 Alterations in body weight were not detected in NCD-fed mice after AAV-miR-20b administration;  
209 however, AAV-miR-20b led to a significant increase in the body weight of HFD-induced obese mice  
210 (Figure 4C). The ratio of fat mass to body weight in AAV-miR-20b administration HFD-fed mice was  
211 higher than that in AAV-Control treated mice (Figure 4D and Figure 4-figure supplement 2); however,  
212 the ratio of lean mass to body weight showed no significant differences (Figure 4E). Consistently,  
213 AAV-miR-20b administration increased liver weight and steatosis in HFD-fed mice (Figure 4F, G). The  
214 hepatic TG level, serum activities of aspartate aminotransferase (AST) and alanine aminotransferase  
215 (ALT), markers of liver injury, were significantly increased with AAV-miR-20b administration compared  
216 with AAV-Control administration in HFD-fed mice (Figure 4H-J).

217 Additionally, we observed that delivery of AAV-miR-20b to HFD-fed mice significantly impaired  
218 glucose tolerance and insulin sensitivity compared to the AAV-Control (Figure 4K, L). Fasting glucose,  
219 insulin, and homeostasis model assessment of insulin resistance (HOMA-IR) levels were also  
220 increased in AAV-miR-20b administrated HFD-fed mice (Figure 4M-O). We observed that genes  
221 involved in FA  $\beta$ -oxidation and FA uptake pathways were downregulated by AAV-miR-20b compared  
222 to AAV-Control in both NCD- and HFD-fed mice, whereas lipogenesis genes were not altered in AAV-  
223 miR-20b administrated mice (Figure 4P-R). These results suggest that miR-20b could aggravate  
224 NAFLD by dysregulating lipid metabolism in a HFD-induced obesity model.

225

#### 226 **Inhibition of miR-20b alleviates hepatic steatosis in HFD-fed mice.**

227 Next, we introduced anti-miR-20b into HFD-fed mice. Administration of AAV-anti-miR-20b led to  
228 decrease of miR-20b in the livers of NCD- and HFD-fed mice compared to AAV-Control injection  
229 (Figure 5A). AAV-anti-miR-20b significantly increased PPAR $\alpha$  expression in the livers of both NCD-  
230 and HFD-fed mice (Figure 5B). Administration of AAV-anti-miR-20b in HFD-fed mice reduced the  
231 body weight compared to that of AAV-Control administrated mice (Figure 5C). We further determined  
232 that alterations in body weight were highly associated with fat mass loss (Figure 5D and Figure 5-  
233 figure supplement 1). While the ratio of lean mass to body weight of AAV-anti-miR-20b administrated  
234 HFD-fed mice was increased, the lean mass was comparable to that of the control (Figure 5E). We

235 next observed that AAV-anti-miR-20b administration reduced liver weight and hepatic steatosis in  
236 HFD-fed mice than in AAV-Control mice (Figure 5F). H&E and Oil Red O staining demonstrated that  
237 delivery of AAV-anti-miR-20b significantly attenuated the size and number of lipid droplets in the liver  
238 compared to AAV-Control administration in HFD-fed mice (Figure 5G). In accordance with histological  
239 changes, metabolic parameters were reduced in AAV-anti-miR-20b administrated mice compared  
240 with the AAV-Control administrated mice (Figure 5H-J). Furthermore, AAV-anti-miR-20b significantly  
241 improved glucose tolerance (Figure 5K) and insulin sensitivity (Figure 5L) compared to the AAV-  
242 Control in HFD-fed mice. Consistently, we determined that both fasting glucose and fasting insulin  
243 levels were decreased by AAV-anti-miR-20b (Figure 5M-O). Delivery of AAV-anti-miR-20b increased  
244 the expression of genes associated with FA  $\beta$ -oxidation and FA uptake compared with the  
245 administration of AAV-Control (Figure 5P-R). Together, these results suggest that suppression of  
246 miR-20b could ameliorate NAFLD by recovering lipid metabolism in a HFD-induced obesity model.

247

#### 248 **The effects of miR-20b are mediated by PPAR $\alpha$ .**

249 Next, we confirmed that the regulation of FA  $\beta$ -oxidation and mitochondrial function by miR-20b is  
250 primarily mediated through the reduction of PPAR $\alpha$ . Transfection of miR-20b into HepG2 cells  
251 reduced the expression and activity of PPAR $\alpha$ , but co-transfected PPAR $\alpha$  expression vector restored  
252 them (Figure 6A, B). Furthermore, the decreased expression of genes involved in lipid metabolism,  
253 such as FA  $\beta$ -oxidation and FA uptake by miR-20b, was significantly restored by the forced  
254 expression of PPAR $\alpha$  (Figure 6C-E). Next, we tested whether the effect of anti-miR-20b was inhibited  
255 by the suppression of PPAR $\alpha$ . The increased expression and activity of PPAR $\alpha$  by anti-miR-20b was  
256 reduced by siRNA targeting PPAR $\alpha$  (siPPARA) (Figure 6F, G). The increased expression of genes by  
257 anti-miR-20b was also suppressed by siPPARA (Figure 6H-J). In addition, fenofibrate, a PPAR $\alpha$   
258 agonist, increased the expression of PPAR $\alpha$  and its transcriptional activity in HepG2 cells transfected  
259 with miR-20b, but could not restore as much on its own effects (Figure 6K, L). Interestingly,  
260 fenofibrate treatment increased the expression of genes involved in FA  $\beta$ -oxidation and FA uptake  
261 which are regulated by PPAR $\alpha$ , but could not overcome the inhibitory effect of miR-20b (Figure 6M-O).  
262 Taken together, these results indicate that the contribution of miR-20b to hepatic steatosis is  
263 mediated by direct inhibition of PPAR $\alpha$  and is important for the treatment of NAFLD.

264

265 **The effects of fenofibrate are limited in miR-20b-introduced mice.**

266 Next, we tested whether NAFLD treatment with fenofibrate was affected by miR-20b expression *in*  
267 *vivo*. Administration of AAV-miR-20b led to elevated hepatic levels of miR-20b compared to AAV-  
268 Control injection in HFD-fed mice, and the level was slightly decreased by fenofibrate treatment  
269 (Figure 7A). Interestingly, we observed that administration of AAV-Control with fenofibrate increased  
270 the level of PPAR $\alpha$ ; however, fenofibrate could not restore the reduced PPAR $\alpha$  expression by AAV-  
271 miR-20b (Figure 7B). Administration of fenofibrate reduced the body and liver weights of AAV-Control  
272 injected mice; however, AAV-miR-20b injected mice exhibited no significant differences by fenofibrate  
273 (Figure 7C, F). The ratio of fat to body weight also displayed no alterations between AAV-miR-20b  
274 and AAV-miR-20b with fenofibrate (Figure 7D). While the ratio of lean mass to body weight was  
275 increased by fenofibrate in AAV-miR-20b injected mice, the lean mass was comparable (Figure 7E).  
276 H&E staining, Oil Red O staining, and hepatic TG levels demonstrated that fenofibrate significantly  
277 attenuated lipid accumulation in the liver of HFD-fed mice, but the effect of fenofibrate was  
278 suppressed by AAV-miR-20b (Figure 7G, H). Serum AST and ALT levels were decreased by  
279 fenofibrate, but this benefit was not detected in AAV-miR-20b injected mice (Figure 7I, J). We  
280 further observed that blood glucose tolerance and insulin sensitivity were improved by fenofibrate;  
281 however, AAV-miR-20b offset the improvement by fenofibrate (Figure 7K, L). Fasting glucose, fasting  
282 insulin, and HOMA-IR levels were markedly decreased by fenofibrate in HFD-fed mice (Figure 7M-O).  
283 In AAV-miR-20b injected mice, fenofibrate did not reduce fasting insulin levels, but decreased fasting  
284 glucose and HOMA-IR levels. Fenofibrate also did not restore the suppressed expression of genes  
285 regulating FA  $\beta$ -oxidation in AAV-miR-20b-injected mice (Figure 7P-R). Taken together, the effect of  
286 fenofibrate to ameliorate NAFLD-like symptoms was limited in AAV-miR-20b administered HFD-fed  
287 mice because of the targeting PPAR $\alpha$  by miR-20b.

288

289 **miR-20b promotes liver inflammation and fibrosis in MCD-Fed Mice.**

290 We further demonstrated that RNA-seq data have a significant correlation of fold change values  
291 with previously published RNA-seq data under both NASH and liver fibrosis conditions within the NR  
292 transcription(Hoang et al., 2019) (Figure 8A, B). This implies that miR-20b is able to set up an NR  
293 transcription program similar to that of NASH and liver fibrosis. To test this hypothesis, AAV-Control or  
294 AAV-anti-miR-20b was administered to C57BL/6 mice placed on a methionine/choline-deficient diet



295 (MCD), which is the most widely used diet to induce NAFLD/NASH. Administration of AAV-anti-miR-  
296 20b led to decrease of miR-20b in the livers of NCD- and MCD-fed mice compared to AAV-Control  
297 injection (Figure 8C). We observed that the expression of PPAR $\alpha$  was increased in MCD-fed mice  
298 and administration of AAV-anti-miR-20b displayed an elevation of PPAR $\alpha$ , both at the mRNA and  
299 protein levels (Figure 8D, E). We next observed that AAV-anti-miR-20b administration significantly  
300 reduced hepatic steatosis in MCD-fed mice than in AAV-Control mice (Figure 8F). Liver sections  
301 clearly showed a decrease in both lipid accumulation and fibrosis with AAV-anti-miR-20b  
302 administration in MCD-fed mice (Figure 8G). Consistently, AAV-anti-miR-20b administration  
303 decreased the levels of hepatic TG, AST, and ALT activity compared to AAV-Control injection (Figure  
304 8H-J). Moreover, AAV-anti-miR-20b significantly reduced the expression of genes related to hepatic  
305 inflammation, including *Tnf*, *Ccl2*, *Il6*, and *Il1b* (Figure 8K), and fibrosis, including the NASH-relevant  
306 genes, such as *Acta2*, *Col1a1*, *Col3a1*, *, *Timp1*, and *Vim* (Figure 8L), in MCD-fed mice. Taken  
307 together, these results indicate that miR-20b plays an important role in the development of fibrosis,  
308 inflammation, and hepatic steatosis in NAFLD progression.*

309

## 310 **Discussion**

311 Obesity has been widely demonstrated to be central to the pathogenesis of NAFLD. Among other  
312 peripheral tissues, the liver plays a dominant role in the regulation of lipid homeostasis(Pawlak,  
313 Lefebvre, & Staels, 2015). Although abnormal regulation of metabolic homeostasis in the liver has  
314 been recognized in diabetes and NAFLD, the underlying molecular mechanisms remain to be  
315 elucidated. Growing evidence has demonstrated that miR-20b levels are significantly upregulated in  
316 the plasma miRNA profiles of NAFLD patients(Jin et al., 2012). Moreover, plasma miR-20b levels  
317 were highly elevated in T2DM/NAFLD patients compared to those in T2DM patients(Ye et al., 2018).  
318 However, the molecular mechanism through which miR-20b regulates NAFLD progression remains  
319 unknown. In this study, we demonstrated that miR-20b promotes NAFLD progression by modulating  
320 lipid metabolism, including FA  $\beta$ -oxidation and FA uptake, as well as ATP production by mitochondrial  
321 biogenesis. Our data clearly showed the regulatory mechanism of PPAR $\alpha$  by miR-20b, and miR-20b  
322 may serve as a novel biological marker in NAFLD.

323 A previous study demonstrated that upregulated miR-20b levels in obesity-induced metabolic  
324 disorders such as T2DM were considered to prevent several targets, such as STAT3, CD36, and

325 PTEN, which are involved in glucose and lipid homeostasis. The miR-20b/STAT axis, which is  
326 involved in the insulin signaling pathway, alters glycogen synthesis in human skeletal muscle  
327 cells(Katayama et al., 2019). Moreover, miR-20b directly targets PTEN involved in PI3K/Akt/mTOR  
328 signaling pathway that modulates glucose metabolism in gastric cells(Streleckiene et al., 2020). Hosui  
329 et al. (2017) proposed a model in which the fatty acid transporter CD36 is also a potential target of  
330 miR-20b, which crucially regulates hepatic lipid metabolism in STAT5 KO mice models. But, it has  
331 been reported that CD36 and FABP1 are direct PPAR $\alpha$  target genes(Rakhshandehroo, Knoch, Muller,  
332 & Kersten, 2010). In this study, we observed that miR-20b downregulated PPAR $\alpha$  and suppressed the  
333 expression of CD36 and FABP1. Thus, PPAR $\alpha$  is the primary target of miR-20b in regulating hepatic  
334 lipid metabolism.

335 Decreased PPAR $\alpha$  is contributed to development of NAFLD(Francque et al., 2015). A few miRNAs  
336 were reported to regulate PPAR $\alpha$  expression in NAFLD. miR-34a targets PPAR $\alpha$  and SIRT1,  
337 associating with FA oxidation and cholesterol synthesis. However the effect of miR-34a on  
338 inflammation and fibrosis is not clear(Ding et al., 2015). miR-21 also decreases the expression of  
339 PPAR $\alpha$  in NASH, however, activated PPAR $\alpha$  by miR-21 suppression reduces inflammation, liver  
340 injury, and fibrosis without improvement in FA  $\beta$ -oxidation and lipid accumulation(Loyer et al., 2016).  
341 In the present study, we demonstrate the novel miRNA which has different mode of action. miR-20b  
342 showed the improved effects on FA oxidation, steatosis, inflammation, and fibrosis in HFD- or MCD-  
343 fed mice. How these miRNAs targeting PPAR $\alpha$  have different regulatory mechanisms should be  
344 further studied.

345 Recent reports suggest that some transcription factors regulate metabolic homeostasis by directly  
346 mediating the expression of miRNAs(Yang & Wang, 2011). E2F1, which is a member of the E2F  
347 transcription factor family, regulates myoblast differentiation and proliferation *via* the auto-regulatory  
348 feedback loop between E2F1 and miR-20b in muscle(Luo, Li, Yi, Nie, & Zhang, 2016). Both the  
349 hepatic expression and activity of E2F1 are increased during obesity. E2F1 deficiency protects  
350 against obesity- and diabetes-induced liver steatosis in mouse models(Zhang et al., 2014).  
351 Additionally, E2F1 induced chronic inflammation and hepatic lipid metabolism during NAFLD  
352 development(Denechaud et al., 2016). Consistent with these results, we observed that the expression  
353 of E2F1 was significantly increased in the fatty liver of both mice and humans, and its expression was  
354 positively correlated with that of miR-20b (Figure 9). These results suggest that E2F1 may be an



355 upstream regulator of miR-20b in the liver, and this upregulation of miR-20b regulates lipid  
356 metabolism in the pathogenesis of NAFLD.

357 NAFLD patients can develop NASH, which is characterized by hepatic steatosis complicated by  
358 chronic hepatocellular damage and severe inflammation with fibrosis, potentially developing into  
359 cirrhosis and HCC(Corey & Kaplan, 2014). This indicates that suppression of NAFLD progression is  
360 the primary option for preventing the development of HCC. Recent reports suggest that PPAR $\alpha$  KO  
361 mice fed an MCD developed much more severe NASH than wild-type mice, and the expression of  
362 PPAR $\alpha$  in HCC tissue was significantly lower than that in normal liver tissue(Montagner et al., 2016).  
363 PPAR $\alpha$  activation contributes to the inhibition of HCC cell proliferation Thus, hepatic PPAR $\alpha$  plays a  
364 crucial role in tumorigenesis in the liver(Lefebvre, Chinetti, Fruchart, & Staels, 2006). Interestingly, it  
365 has been reported that upregulated miR-20b highly regulates cancer cell proliferation and promotes  
366 proliferation of H22 hepatocellular carcinoma cells (Peng et al., 2019; Xia et al., 2020). Thus, plasma  
367 miR-20b can be a promising target in liver cancer development. Indeed, we observed that the level of  
368 miR-20b was increased in NAFLD patients, but even robustly increased in the NASH stage.  
369 Furthermore, we observed that the hepatic function of miR-20b dramatically regulates the genes  
370 involved in inflammation and fibrosis by directly repressing PPAR $\alpha$  in MCD-fed mice. Thus, our study  
371 strongly suggested that miR-20b regulates the pathogenesis of NAFLD, but might also be relevant in  
372 the development of severe stages of liver fibrosis and even in HCC.

373 Our present results strongly suggest that miR-20b may be a druggable target in NAFLD patients.  
374 Fenofibrates, PPAR $\alpha$  agonists, are widely used in clinical trials for the treatment of NAFLD patients.  
375 Administration of fenofibrate significantly increases the expression of PPAR $\alpha$  and its activity, thereby  
376 improving NAFLD by activating FA  $\beta$ -oxidation and inhibiting inflammation(Valasek, Clarke, & Repa,  
377 2007). However, chronic fenofibrate administration causes various side effects and efficiency  
378 problems. Growing evidence suggests that long-term treatment with fenofibrate induces HCC in  
379 NAFLD patients(Gonzalez & Shah, 2008). Therefore, multiple reports suggest that the combination  
380 therapy of fenofibrates with various agents is very encouraging as a more effective and safe treatment  
381 option for improving NAFLD(Athyros, Papageorgiou, Athyrou, Demitriadis, & Kontopoulos, 2002;  
382 Farnier et al., 2005). Our results suggest that administration of fenofibrate does not effectively  
383 improve lipid accumulation and lipid metabolism when miR-20b is overexpressed. Thus, these

384 findings suggest that targeting miR-20b may be a novel therapeutic strategy for the treatment of  
385 NAFLD.

386

## 387 **Materials and Methods**

### 388 **Cell Culture**

389 Human liver cells, HepG2 and Huh-7 cells were purchased from American Type Culture Collection  
390 (ATCC, Manassas, VA) and cultured in Dulbecco's Modified Eagle's Medium (DMEM) containing 10 %  
391 fetal bovine serum (Gibco, BRL, Grand Island, NY) and 1 % penicillin/streptomycin (ThermoFisher  
392 Scientific, Waltham, MA). miRNAs and siRNA were obtained from GenePharma (Shanghai, China).  
393 The miRNAs and siRNA used in this study are listed in the table below. HepG2 and Huh-7 cells were  
394 transfected with miRNA or siRNA using Lipofectamine<sup>TM</sup> RNAiMAX transfection reagent  
395 (ThermoFisher Scientific) according to the manufacturer's instructions and following experiments were  
396 performed 48 h after transfection. For intracellular lipid accumulation, cells were cultured in a medium  
397 with the addition of 1 mmol/L sodium oleic acid for 24 h and then cells were harvested for further  
398 analysis. Images of cells stained with Oil Red O were obtained with EVOS FL (Thermo Fisher  
399 Scientific).

| Name                     | Sequence                  |
|--------------------------|---------------------------|
| miR-NC                   | UCACAACCUCCUAGAAAGAGUAGA  |
| miR-20b (Mimic)          | CAAAGUGCUCUAGUGCAGGUAG    |
| anti-miR-20b (Inhibitor) | CUACCUGCACUAUGAGCACUUUG   |
| siPPARA                  | CGGCGAGGATAGTTCTGGAAGCTTT |

400

### 401 **Human patients**

402 Human liver tissue samples of 13 patients were acquired from the BioResource Center (BRC) of  
403 Asan Medical Center, Seoul, Republic of Korea. The process of 13 human tissue samples was  
404 officially approved by the Institutional Review Board of Asan Medical Center (IRB approval number:  
405 2018-1512). Human liver tissues were obtained from 5 control individuals, 4 simple steatosis patients  
406 (fatty liver), and 4 non-alcoholic steatohepatitis (NASH) patients. Histologically normal liver, simple  
407 steatosis and NASH samples dissected adjacent to the tumor but beyond the observed aberrations  
408 are indicated as control normal liver samples, simple steatosis, and NASH samples, respectively(Aran  
409 et al., 2017). In addition, all patients diagnosed with alcoholic liver disease, viral infected hepatitis and  
410 toxic hepatitis were excluded.

411

## 412 **Library preparation for transcriptome sequencing**

413 RNA-seq was performed on triplicate sample from HepG2 cell with or without overexpression of  
414 miR-20b. Total RNA was isolated using the RNeasy mini kit (Qiagen, Hilden, Germany) according to  
415 the manufacturer's instructions. Library prep and RNA-seq were performed by Novogene (Hong  
416 Kong). A total amount of 1 µg RNA per sample was used as input material for the RNA sample  
417 preparations. Sequencing libraries were generated using NEBNext® UltraTM RNA Library Prep Kit for  
418 Illumina® (NEB, Ipswich, MA) following manufacturer's recommendations and index codes were  
419 added to attribute sequences to each sample. PCR products were purified (AMPure XP system,  
420 Beckman Coulter Life Sciences, Indianapolis, IN) and library quality was assessed on the Agilent  
421 Bioanalyzer 2100 system (Agilent Technologies, Inc., Santa Clara, CA). The clustering of the index-  
422 coded samples was performed on a cBot Cluster Generation System using PE Cluster Kit cBot-HS  
423 (Illumina, San Diego, CA) according to the manufacturer's instructions. After cluster generation, the  
424 library preparations were sequenced on an Illumina platform (NovaSeq 6000 PE150) and paired-end  
425 reads were generated.

426

## 427 **miRNA regulatory network analysis of nuclear receptor genes**

428 The RNA-seq fold change data for 16,010 genes were obtained from the Supplementary file 1 of a  
429 previous work (Hoang et al., 2019). The miRNA target genes that shared evolutionarily conserved  
430 binding sites for 353 miRNAs ( $\geq 10$  genes) were downloaded from TargetScan database (Ver.7.2)  
431 (Agarwal et al., 2015). We used the 50 genes that belonged to the nuclear receptor transcription  
432 pathway in REACTOME database (Jassal et al., 2020) (Liberzon et al., 2015) to analyze how miRNAs  
433 regulate the transcription of NR genes. Among them 17 genes were significantly downregulated in  
434 NASH patients (adjusted  $p$ -value  $< 0.1$ ). The enrichment of these downregulated NR genes in the  
435 targets of the 353 miRNAs were assessed using hypergeometric distribution. The  $p$ -value of a miRNA  
436 is given as follows:

$$p - \text{value (miRNA)} = \sum_{i=0}^{M \wedge D} \frac{\binom{D}{i} \binom{N-D}{M-i}}{\binom{N}{M}}$$

437 where  $N$  is the total number of genes analyzed,  $M$  is the number of candidate target genes of the  
438 miRNA,  $D$  is the downregulated NR genes, and  $O$  is the observed overlap between miRNA targets  
439 and the downregulated NR genes.

440 The miRNAs whose target genes were enriched in the downregulated NR genes with adjusted  $p$ -  
441 value  $\leq 0.05$  were used to construct the regulatory networks of the NR transcription pathway (Figure  
442 1A).

443

#### 444 **Differential expression and gene-set enrichment analysis (GSEA)**

445 The differential expression analysis of RNA-seq data were performed using limma package(Ritchie  
446 et al., 2015) where moderated  $t$ -test was applied for voom-transformed read counts. The resulting  
447 fold-change values between the test and control conditions were used for the pathway analysis. The  
448 preranked GSEA (R package)(Subramanian et al., 2005) was used for the pathway analysis of gene  
449 sets from WikiPathway(Martens et al., 2021), REACTOME(Jassal et al., 2020), KEGG(Kanehisa,  
450 Furumichi, Tanabe, Sato, & Morishima, 2017) databases (MSigDB) and the enrichment score plots.

451

#### 452 **Immunoblotting**

453 Supernatants containing protein contents were determined by Bradford Protein Assay (Bio-Rad  
454 Laboratories, Hercules, CA). Proteins were immunoblotted with anti-PPAR $\alpha$  (ab24509, Abcam,  
455 Cambridge, MA) and anti-HSP90 (4877S, Cell Signaling Technology, Danvers, MA).

456

#### 457 **Quantitative PCR**

458 Total mRNAs were isolated using TRIzol reagent purchased from Thermo Fisher Scientific.  
459 Reverse-transcription of the RNA was performed with ABI Reverse Transcription Kit (Thermo Fisher  
460 Scientific). Quantitative PCR was performed using 7900HT Fast Real-Time PCR System (Life  
461 Technologies, Carlsbad, CA) following the manufacturer's instructions. Relative mRNA expression  
462 levels of each gene were normalized to TATA-binding protein TBP. The mtDNA copy number was  
463 evaluated based on the ratio of mtDNA to nuclear DNA by quantitative PCR. The mtDNA was  
464 quantified based on the mitochondrial gene, *VIPR1*, and *MT-ATP6*, respectively. The relative amounts

465 of mtDNA were normalized to nuclear DNA, *B2M*. The primer pairs used in this study are listed in the  
 466 table below.

| Human Gene | Sequences of the primers for qPCR |                             |
|------------|-----------------------------------|-----------------------------|
|            | Forward primer                    | Reverse primer              |
| miR-20b    | GCAAAGTGCTCATAGTGCAGGTAG          | TCGCACTTGTGCATACACCAG       |
| U6         | CTCGCTTCGGCAGCACACA               | AACGCTTCACGAATTTGCGT        |
| PPARA      | GCTATCATTACGGAGTCCACG             | TCGCACTTGTGCATACACCAG       |
| CPT1A      | AGGCGACATCAATCCGAAC               | AAAGGCTACGAATGGGAAGG        |
| ACOX1      | CCACGTATGACCCTGAAACC              | TCCATAGCATTTCCTTAGTG        |
| SREBF1     | CAACACAGCAACCAGAACTC              | CTCCACCTCAGTCTTCACG         |
| FASN       | CAAGCTGAAGGACCTGTCTAG             | CGGAGTGAATCTGGGTTGATG       |
| CD36       | GCCAGGTATTGCAGTTCTTTTC            | TGTCTGGGTTTTCAACTGGAG       |
| FABP1      | GCAGAGCCAGGAAAACCTTTG             | AGCGGTGATGGTGAACCTTG        |
| PPARGC1A   | ACCAAACCCACAGAGAACAG              | GGGTCAGAGGAAGAGATAAAGTTG    |
| SIRT1      | CCCTCAAAGTAAGACCAGTAGC            | CACAGTCTCCAAGAAGCTCTAC      |
| VIPR1      | CTCCACCATTAGCACCCAAAGCTAAG        | GATATTGATTTACGGAGGATGGTGGTC |
| MT-ATP6    | AACGAAAATCTGTTTCGCTTCAT           | ATGTGTTGTCTGCAGGTAGAG       |
| HMGCL      | GAGTTTTTCAGAGGTTTGACGC            | CAAGAGCACAGGAGACGTAC        |
| ACAT1      | CGGGCTAACTGATGTCTACAA             | CAAATTTCCAGCTTCCCATG        |
| ACAT2      | CCCAGAACAGGACAGAGAATG             | AGCTTGGACATGGCTTCTATG       |
| RORA       | GGTGATGCTTTTTGTTCTTACTGG          | TGTCTCCACAGATCTTGCATG       |
| RORC       | TGGTGCTGGTTAGGATGTG               | GGAGTGGGAGAAGTCAAAGATG      |
| THRB       | CATCAAAACTGTCACCGAAGC             | TCCAAGTCAACCTTTCCACC        |
| NRBP1      | GTTCCACCCAGCATTGTTTG              | CAGGGATTTACGCCAGTACG        |
| NAGK       | TATTTCCAGGTGCCAGATCG              | CTGAAGATATAGCGGGAAAGGG      |
| USP46      | ATACACCAAGCTGTCTTACCG             | ATATAATGCCACGATTAGGACC      |
| ITGB8      | CGTCTCATCTCGCTCTTGATAG            | TTCTCTGAAAGTTGGCCTAGTG      |
| BMPR2      | GGCTGACTGGAAATAGACTGG             | CACAGTCCCTCAAGTTCACAG       |
| ZNFX1      | CCGAGGATTGTCATAGTGGAAAG           | AGATCATAACGTTGGCACTG        |
| EPHA5      | AGATTGAGGCAGTGAATGGAG             | GCCAAGACAAAGAGATGCTG        |
| E2F1       | TCTCCGAGGACACTGACAG               | ATCACCATAACCATCTGCTCTG      |
| TBP        | CCACTCACAGACTCTACAAC              | CTGCGGTACAATCCAGAAGT        |
| B2M        | TGCTGTCTCCATGTTTGATGTATCT         | TCTCTGCTCCCCACCTCTAAGT      |

| Mouse Gene | Sequences of the primers for qPCR |                          |
|------------|-----------------------------------|--------------------------|
|            | Forward primer                    | Reverse primer           |
| miR-20b    | GCAAAGTGCTCATAGTGCAGGTAG          | TCGCACTTGTGCATACACCAG    |
| U6         | CTCGCTTCGGCAGCACACA               | AACGCTTCACGAATTTGCGT     |
| Ppara      | TCAGGGTACCACTACGGAGT              | CTTGGCATTCTTCAAAGCG      |
| Cpt1a      | AGTTCCATGACCCATCTCTGTC            | TTCTTCTTCCAGAGTGCAGC     |
| Acox1      | TAAGTTCCTCACTCGAAGCCA             | AGTTCCATGACCCATCTCTGTC   |
| Srebf1     | GGAGCCATGGATTGCACATT              | CTTCCAGAGAGGAGGCCAG      |
| Fasn       | GGAGGTGGTGATAGCCGGTAT             | TGGGTAATCCATAGAGCCAG     |
| Cd36       | GCGACATGATTAATGGCACAG             | GATCCGAACACAGCGTAGATAG   |
| Fabp1      | TCTCCGGCAAGTACCAATTG              | TTGATGTCCTTCCCTTTCTGG    |
| Tnf        | CCCTCACACTCAGATCATCTTCT           | GCTACGACGTGGGCTACAG      |
| Ccl2       | TTAAAAACCTGGATCGGAACCAA           | GTTACCGTAAGCCCAATTT      |
| Il6        | TAGTCCCTTCCACCCCAATTTCC           | TTGGTCCCTTAGCCACTCCTTC   |
| Il1b       | GCACTACAGGCTCCGAGATGAAC           | TTGTCGTTGCTTGGTTCTCCTTGT |
| Acta2      | GTGAAGAGGAAGACAGCACAG             | GCCCATTCACCAACTACTCC     |
| Col1a1     | CATAAAGGGTCATCGTGGCT              | TTGAGTCCGTCTTTGCCAG      |
| Col3a1     | GAAGTCTCTGAAGCTGATGGG             | TTGCCTTGCGTGTTTGATATTC   |

|       |                         |                       |
|-------|-------------------------|-----------------------|
| Fn    | CTTTGGCAGTGGTCATTTTCAG  | ATTCTCCCTTTCCATTCCCG  |
| Timp1 | CTCAAAGACCTATAGTGCTGGC  | CAAAGTGACGGCTCTGGTAG  |
| Vim   | CGTCCACACGCACCTACAG     | GGGGATGAGGAATAGAGGCT  |
| E2f1  | TGCAGAACAGATGGTCATAGTG  | GGGCACAGGAAAACATCAATG |
| Tbp   | ACCCTTCACCAATGACTCCTATG | TGACTGCAGCAAATCGCTTGG |

467

#### 468 **Cellular Oxygen Consumption Rate (OCR)**

469 OCR of HepG2 cells were analyzed by Seahorse XF24 extracellular flux analyzer (Seahorse  
470 Bioscience, North Billerica, MA) following the manufacturer's instruction. The results were normalized  
471 with the protein quantity of each corresponding well.

472

#### 473 **Measurement of FA $\beta$ -oxidation and uptake**

474 FA  $\beta$ -oxidation were measured by the conversion of [9,10-<sup>3</sup>H(N)]-Palmitic Acid (PerkinElmer,  
475 Waltham, MA) to <sup>3</sup>H<sub>2</sub>O. Cells were incubated with 1.25 mCi/L [9,10-<sup>3</sup>H(N)]-Palmitic Acid with cold  
476 palmitic acid in a final concentration of 200 $\mu$ M for 4 hours. After incubation, medium were recovered  
477 and precipitated with an equal volume of 10 % trichloroacetic acid. The supernatant was transferred  
478 to new- and capless-microtube and the capless-tube was inserted into D.W-added Scintillation tube  
479 and incubated at 60 °C for 12 h. The capless tube was removed from scintillation tube and measured  
480 the CPMA with scintillation counter oil using Tri-carb 2910TR liquid scintillation counter  
481 (PerkinElmer).

482 For FA uptake measurement, cells were incubated with 0.5  $\mu$ Ci/L [9,10-<sup>3</sup>H(N)]-Palmitic Acid with  
483 cold palmitic acid in a final concentration of 200 $\mu$ M for 2 hours. Uptake was stopped by addition of  
484 200  $\mu$ M phloretin in 0.1 % BSA and lysed in 0.1 N NaOH / 0.03 % SDS buffer. The radioactivity of  
485 each lysate was counted using Tri-carb 2910TR liquid scintillation counter. The  $\beta$ -oxidation and  
486 uptake was normalized to lysate protein concentration determined by BSA assay.

487

#### 488 **Metabolites assay**

489 HepG2 cells were transfected with miR-20b, anti-miR-20b, or miR-NC, respectively. After 48 h,  
490 HepG2 cells (20,000 cells per well) were seeded in 96-well MitoPlate S-1 plates and examined in  
491 mitochondrial metabolites activity following the manufacturer's instructions (Biolog, Hayward, CA).

492

#### 493 **Mice**

494 All animal experiments were performed according to procedures approved by the Ulsan National  
495 Institute of Science and Technology's Institutional Animal Care and Use Committee (UNISTIACUC-  
496 19-04). Mice were maintained in a specific pathogen-free animal facility under a 12-h light/dark cycle  
497 at a temperature of 21°C and allowed free access to water and food. Seven-week-old male C57BL/6J  
498 mice (DBL, Chungbuk, Republic of Korea) were fed a HFD (60% kcal fat, D12492, Research Diets  
499 Inc., New Brunswick, NJ) for 12 weeks or a MCD (A02082002BR, Research Diets Inc., New  
500 Brunswick, NJ, USA) for 4 weeks. Fenofibrate (100 mg/kg, sc-204751, Santa Cruz biotechnology,  
501 Dallas, TX) was administered orally for 4 weeks before mice were sacrificed.

502

### 503 **Hepatocyte isolation**

504 Briefly, mice were anesthetized with isoflurane, and 24-gauge needle was inserted into the portal  
505 vein. Then the inferior vena cava was cut, and the mouse liver was perfused sequentially with solution  
506 I (142 µM NaCl, 6.7 µM KCl, 10 µM HEPES, and 2.5 mM EGTA), and solution II (66.7 mM NaCl, 6.7  
507 mM KCl, 50mM HEPES, 4.8 mM CaCl<sub>2</sub>·2H<sub>2</sub>O, and 0.01 % Type IV collagenase (Sigma- Aldrich, St.  
508 Louis, MO)). After digestion, the liver was disrupted over a 70-µm cell strainer, and cell suspension  
509 was spun at 50 x g for 5min at 4 °C. The supernatant was gently aspirated and the cells were  
510 resuspended in M199 with EBSS (M199/EBSS) medium and gently mixed with equal volume of  
511 Percoll working solution (48.6 % Percoll). The cell suspension was spun at 100 x g for 5 min at 4 °C,  
512 and the pellet washed once with M199/EBSS. After viable cells were counted with trypan blue, the  
513 isolated hepatocytes were seed in M199/EBSS medium supplemented with 10 % FBS, 1 %  
514 penicillin/streptomycin, and 10 nM dexamethasone.

515

### 516 **Production of AAV**

517 The miR-20b and anti-miR-20b were cloned into the pOTT385-pAAV CMV-IE IRES EGFP vector  
518 (Addgene plasmid # 102936)(Nelson et al., 2019) and co-transfected with pAAV-DJ vector and pAAV-  
519 Helper vector into HEK 293T cells to generate recombinant adeno-associated virus expressing miR-  
520 20b or anti-miR-20b according to the manufacturer's protocol (Cell Biolabs, San Diego, CA). The  
521 AAVs were purified with AAVpro® Purification Kit (Takara Bio, Shiga, Japan). After feeding HFD for 8  
522 weeks, purified AAV-miR-20b, AAV-anti-miR-20b, or AAV-Control (1 X 10<sup>10</sup> PFU) was injected into



523 mice *via* tail-vein. AAV-Control or AAV-anti-miR-20b was injected into mice *via* tail-vein before the  
524 initiation of MCD diet.

525

### 526 **Metabolic analysis**

527 Mice were fasted overnight (18 h) before intraperitoneal injection of D-glucose (2 g/kg body weight)  
528 for glucose tolerance test. For insulin tolerance test, mice were fasted for 4 h before intraperitoneal  
529 injection of insulin (0.75 U/kg body weight). Every glucose was examined with tail-vein blood at  
530 indicated intervals after injection using a glucometer. For analyzing metabolic parameters, insulin  
531 (90080, Crystal Chem, Elk Grove Village, IL), ALT (K752, Biovision Inc., Milpitas, CA), AST (K753,  
532 Biovision Inc.), cholesterol (K603, BioVision Inc.), and TG (10010303, Cayman Chemical, Ann Arbor,  
533 MI) were determined. Body composition of mice was measured using an EchoMRI100V, quantitative  
534 nuclear resonance system (Echo Medical Systems, Houston, TX).

535

### 536 **Histological analysis**

537 Liver tissues were isolated from mice and immediately fixed with 4% formalin (Sigma- Aldrich, St.  
538 Louis, MO). Histological changes of lipid droplets were examined by H&E staining and Oil Red O  
539 staining. As counterstain, Mayer's hematoxylin was used for every slide. Liver fibrosis was further  
540 examined by Sirius red with liver section. Images were obtained with Olympus BX53 microscope and  
541 DP26 camera.

542

### 543 **Statistical analysis**

544 All data are represented as mean  $\pm$  SEM. Statistically significant differences were assessed by the  
545 Student's t-test. Statistical analyses were performed using Microsoft Excel or GraphPad Prism 9. All  
546 of the significance are expressed as  $*P < 0.05$ ,  $**P < 0.01$ ,  $***P < 0.001$ ,  $^{\#}P < 0.05$ ,  $^{\#\#}P < 0.01$ ,  $^{\#\#\#}P$   
547  $< 0.001$ ,  $^{\$}P < 0.05$ ,  $^{\$\$}P < 0.01$ , and  $^{\$\$\$}P < 0.001$ .

548

### 549 **Data Availability**

550 The data sets generated and analyzed during the current study are available from the corresponding  
551 author upon reasonable request. The RNA-Seq data have been deposited at the Gene Expression  
552 Omnibus (GEO) website: <https://www.ncbi.nlm.nih.gov/geo/query/acc.cgi?acc=GSE168484>



553 (accession number GSE168484). Source data files are provided for Figure 1, Figure 2, Figure 2-figure  
554 supplement 2, Figure 3, Figure 3-figure supplement 1, Figure 3-figure supplement 2, Figure 3-figure  
555 supplement 3, Figure 3-figure supplement 4, Figure 4, Figure 4-figure supplement 1, Figure 5, Figure  
556 6, Figure 7, Figure 8, and Figure 9.

557

## 558 **Acknowledgments**

559 This research was funded by Korea Mouse Phenotyping Project (2016M3A9D5A01952411), the  
560 National Research Foundation of Korea (NRF) grant funded by the Korea government  
561 (2020R1F1A1061267, 2018R1A5A1024340), the Future-leading Project Research Fund (1.210034.01)  
562 of UNIST to J.H.C. and the National Research Foundation of Korea (NRF) grant funded by the Korea  
563 government (2020R111A1A01074940) to H-J.J.

564

## 565 **Competing Interest Statement**

566 No conflicts of interest relevant to this manuscript.

567

## 568 **References**

- 569 Agarwal, V., Bell, G. W., Nam, J. W., & Bartel, D. P. (2015). Predicting effective microRNA target  
570 sites in mammalian mRNAs. *Elife*, *4*. doi:10.7554/eLife.05005
- 571 Aran, D., Camarda, R., Odegaard, J., Paik, H., Oskotsky, B., Krings, G., . . . Butte, A. J. (2017).  
572 Comprehensive analysis of normal adjacent to tumor transcriptomes. *Nat Commun*, *8*(1),  
573 1077. doi:10.1038/s41467-017-01027-z
- 574 Athyros, V. G., Papageorgiou, A. A., Athyrou, V. V., Dimitriadis, D. S., & Kontopoulos, A. G. (2002).  
575 Atorvastatin and micronized fenofibrate alone and in combination in type 2 diabetes with  
576 combined hyperlipidemia. *Diabetes Care*, *25*(7), 1198-1202. doi:10.2337/diacare.25.7.1198
- 577 Bartel, D. P. (2004). MicroRNAs: genomics, biogenesis, mechanism, and function. *Cell*, *116*(2), 281-  
578 297. doi:10.1016/s0092-8674(04)00045-5
- 579 Chakravarthy, M. V., Pan, Z., Zhu, Y., Tordjman, K., Schneider, J. G., Coleman, T., . . . Semenkovich,  
580 C. F. (2005). "New" hepatic fat activates PPARalpha to maintain glucose, lipid, and  
581 cholesterol homeostasis. *Cell Metab*, *1*(5), 309-322. doi:10.1016/j.cmet.2005.04.002
- 582 Corey, K. E., & Kaplan, L. M. (2014). Obesity and liver disease: the epidemic of the twenty-first  
583 century. *Clin Liver Dis*, *18*(1), 1-18. doi:10.1016/j.cld.2013.09.019

- 584 de Alwis, N. M., & Day, C. P. (2008). Non-alcoholic fatty liver disease: the mist gradually clears. *J*  
585 *Hepatol*, *48 Suppl 1*, S104-112. doi:10.1016/j.jhep.2008.01.009
- 586 Denechaud, P. D., Lopez-Mejia, I. C., Giralt, A., Lai, Q., Blanchet, E., Delacuisine, B., . . . Fajas, L.  
587 (2016). E2F1 mediates sustained lipogenesis and contributes to hepatic steatosis. *J Clin*  
588 *Invest*, *126*(1), 137-150. doi:10.1172/JCI81542
- 589 Ding, J., Li, M., Wan, X., Jin, X., Chen, S., Yu, C., & Li, Y. (2015). Effect of miR-34a in regulating  
590 steatosis by targeting PPARalpha expression in nonalcoholic fatty liver disease. *Sci Rep*, *5*,  
591 13729. doi:10.1038/srep13729
- 592 Fabbrini, E., Sullivan, S., & Klein, S. (2010). Obesity and nonalcoholic fatty liver disease:  
593 biochemical, metabolic, and clinical implications. *Hepatology*, *51*(2), 679-689.  
594 doi:10.1002/hep.23280
- 595 Farnier, M., Freeman, M. W., Macdonell, G., Perevozskaya, I., Davies, M. J., Mitchel, Y. B., . . .  
596 Ezetimibe Study, G. (2005). Efficacy and safety of the coadministration of ezetimibe with  
597 fenofibrate in patients with mixed hyperlipidaemia. *Eur Heart J*, *26*(9), 897-905.  
598 doi:10.1093/eurheartj/ehi231
- 599 Francque, S., Verrijken, A., Caron, S., Prawitt, J., Paumelle, R., Derudas, B., . . . Staels, B. (2015).  
600 PPARalpha gene expression correlates with severity and histological treatment response in  
601 patients with non-alcoholic steatohepatitis. *J Hepatol*, *63*(1), 164-173.  
602 doi:10.1016/j.jhep.2015.02.019
- 603 Gonzalez, F. J., & Shah, Y. M. (2008). PPARalpha: mechanism of species differences and  
604 hepatocarcinogenesis of peroxisome proliferators. *Toxicology*, *246*(1), 2-8.  
605 doi:10.1016/j.tox.2007.09.030
- 606 Hoang, S. A., Oseini, A., Feaver, R. E., Cole, B. K., Asgharpour, A., Vincent, R., . . . Sanyal, A. J. (2019).  
607 Gene Expression Predicts Histological Severity and Reveals Distinct Molecular Profiles of  
608 Nonalcoholic Fatty Liver Disease. *Sci Rep*, *9*(1), 12541. doi:10.1038/s41598-019-48746-5
- 609 Hosui, A., Tatsumi, T., Hikita, H., Saito, Y., Hiramatsu, N., Tsujii, M., . . . Takehara, T. (2017). Signal  
610 transducer and activator of transcription 5 plays a crucial role in hepatic lipid metabolism  
611 through regulation of CD36 expression. *Hepatol Res*, *47*(8), 813-825.  
612 doi:10.1111/hepr.12816
- 613 Jassal, B., Matthews, L., Viteri, G., Gong, C., Lorente, P., Fabregat, A., . . . D'Eustachio, P. (2020). The  
614 reactome pathway knowledgebase. *Nucleic Acids Res*, *48*(D1), D498-D503.  
615 doi:10.1093/nar/gkz1031
- 616 Jin, X., Chen, Y. P., Kong, M., Zheng, L., Yang, Y. D., & Li, Y. M. (2012). Transition from hepatic  
617 steatosis to steatohepatitis: unique microRNA patterns and potential downstream  
618 functions and pathways. *J Gastroenterol Hepatol*, *27*(2), 331-340. doi:10.1111/j.1440-  
619 1746.2011.06864.x
- 620 Kanehisa, M., Furumichi, M., Tanabe, M., Sato, Y., & Morishima, K. (2017). KEGG: new perspectives  
621 on genomes, pathways, diseases and drugs. *Nucleic Acids Res*, *45*(D1), D353-D361.  
622 doi:10.1093/nar/gkw1092

- 623 Katayama, M., Wiklander, O. P. B., Fritz, T., Caidahl, K., El-Andaloussi, S., Zierath, J. R., & Krook, A.  
624 (2019). Circulating Exosomal miR-20b-5p Is Elevated in Type 2 Diabetes and Could Impair  
625 Insulin Action in Human Skeletal Muscle. *Diabetes*, *68*(3), 515-526. doi:10.2337/db18-0470
- 626 Lefebvre, P., Chinetti, G., Fruchart, J. C., & Staels, B. (2006). Sorting out the roles of PPAR alpha in  
627 energy metabolism and vascular homeostasis. *J Clin Invest*, *116*(3), 571-580.  
628 doi:10.1172/JCI27989
- 629 Liberzon, A., Birger, C., Thorvaldsdottir, H., Ghandi, M., Mesirov, J. P., & Tamayo, P. (2015). The  
630 Molecular Signatures Database (MSigDB) hallmark gene set collection. *Cell Syst*, *1*(6), 417-  
631 425. doi:10.1016/j.cels.2015.12.004
- 632 Lopez-Sanchez, G. N., Dominguez-Perez, M., Uribe, M., Chavez-Tapia, N. C., & Nuno-Lambarri, N.  
633 (2021). Non-alcoholic fatty liver disease and microRNAs expression, how it affects the  
634 development and progression of the disease. *Ann Hepatol*, *21*, 100212.  
635 doi:10.1016/j.aohp.2020.04.012
- 636 Lopez-Velazquez, J. A., Carrillo-Cordova, L. D., Chavez-Tapia, N. C., Uribe, M., & Mendez-Sanchez,  
637 N. (2012). Nuclear receptors in nonalcoholic Fatty liver disease. *J Lipids*, *2012*, 139875.  
638 doi:10.1155/2012/139875
- 639 Loyer, X., Paradis, V., Henique, C., Vion, A. C., Colnot, N., Guerin, C. L., . . . Rautou, P. E. (2016). Liver  
640 microRNA-21 is overexpressed in non-alcoholic steatohepatitis and contributes to the  
641 disease in experimental models by inhibiting PPARalpha expression. *Gut*, *65*(11), 1882-  
642 1894. doi:10.1136/gutjnl-2014-308883
- 643 Luo, W., Li, G., Yi, Z., Nie, Q., & Zhang, X. (2016). E2F1-miR-20a-5p/20b-5p auto-regulatory  
644 feedback loop involved in myoblast proliferation and differentiation. *Sci Rep*, *6*, 27904.  
645 doi:10.1038/srep27904
- 646 Martens, M., Ammar, A., Riutta, A., Waagmeester, A., Slenter, D. N., Hanspers, K., . . . Kutmon, M.  
647 (2021). WikiPathways: connecting communities. *Nucleic Acids Res*, *49*(D1), D613-D621.  
648 doi:10.1093/nar/gkaa1024
- 649 McKenna, N. J., Cooney, A. J., DeMayo, F. J., Downes, M., Glass, C. K., Lanz, R. B., . . . O'Malley, B.  
650 W. (2009). Minireview: Evolution of NURSA, the Nuclear Receptor Signaling Atlas. *Mol*  
651 *Endocrinol*, *23*(6), 740-746. doi:10.1210/me.2009-0135
- 652 Montagner, A., Polizzi, A., Fouche, E., Ducheix, S., Lippi, Y., Lasserre, F., . . . Guillou, H. (2016). Liver  
653 PPARalpha is crucial for whole-body fatty acid homeostasis and is protective against  
654 NAFLD. *Gut*, *65*(7), 1202-1214. doi:10.1136/gutjnl-2015-310798
- 655 Nelson, B. S., Fulenwider, H. D., Nennig, S. E., Smith, B. M., Sequeira, M. K., Chimberoff, S. H., . . .  
656 Schank, J. R. (2019). Escalated Alcohol Self-Administration and Sensitivity to Yohimbine-  
657 Induced Reinstatement in Alcohol Preferring Rats: Potential Role of Neurokinin-1  
658 Receptors in the Amygdala. *Neuroscience*, *413*, 77-85.  
659 doi:10.1016/j.neuroscience.2019.06.023

- 660 Pawlak, M., Lefebvre, P., & Staels, B. (2015). Molecular mechanism of PPARalpha action and its  
661 impact on lipid metabolism, inflammation and fibrosis in non-alcoholic fatty liver disease. *J*  
662 *Hepatol*, *62*(3), 720-733. doi:10.1016/j.jhep.2014.10.039
- 663 Peng, L., Li, S., Li, Y., Wan, M., Fang, X., Zhao, Y., . . . Xuan, Y. (2019). Regulation of BTG3 by  
664 microRNA-20b-5p in non-small cell lung cancer. *Oncol Lett*, *18*(1), 137-144.  
665 doi:10.3892/ol.2019.10333
- 666 Rakhshandehroo, M., Knoch, B., Muller, M., & Kersten, S. (2010). Peroxisome proliferator-activated  
667 receptor alpha target genes. *PPAR Res*, *2010*. doi:10.1155/2010/612089
- 668 Ritchie, M. E., Phipson, B., Wu, D., Hu, Y., Law, C. W., Shi, W., & Smyth, G. K. (2015). limma powers  
669 differential expression analyses for RNA-sequencing and microarray studies. *Nucleic Acids*  
670 *Res*, *43*(7), e47. doi:10.1093/nar/gkv007
- 671 Streleckiene, G., Inciuraitė, R., Juzenas, S., Salteniene, V., Steponaitiene, R., Gyvyte, U., . . .  
672 Skieceviciene, J. (2020). miR-20b and miR-451a Are Involved in Gastric Carcinogenesis  
673 through the PI3K/AKT/mTOR Signaling Pathway: Data from Gastric Cancer Patients, Cell  
674 Lines and Ins-Gas Mouse Model. *Int J Mol Sci*, *21*(3). doi:10.3390/ijms21030877
- 675 Subramanian, A., Tamayo, P., Mootha, V. K., Mukherjee, S., Ebert, B. L., Gillette, M. A., . . . Mesirov,  
676 J. P. (2005). Gene set enrichment analysis: a knowledge-based approach for interpreting  
677 genome-wide expression profiles. *Proc Natl Acad Sci U S A*, *102*(43), 15545-15550.  
678 doi:10.1073/pnas.0506580102
- 679 Valasek, M. A., Clarke, S. L., & Repa, J. J. (2007). Fenofibrate reduces intestinal cholesterol  
680 absorption via PPARalpha-dependent modulation of NPC1L1 expression in mouse. *J Lipid*  
681 *Res*, *48*(12), 2725-2735. doi:10.1194/jlr.M700345-JLR200
- 682 Xia, L., Li, F., Qiu, J., Feng, Z., Xu, Z., Chen, Z., & Sun, J. (2020). Oncogenic miR-20b-5p contributes  
683 to malignant behaviors of breast cancer stem cells by bidirectionally regulating CCND1  
684 and E2F1. *BMC Cancer*, *20*(1), 949. doi:10.1186/s12885-020-07395-y
- 685 Yang, Z., & Wang, L. (2011). Regulation of microRNA expression and function by nuclear receptor  
686 signaling. *Cell Biosci*, *1*(1), 31. doi:10.1186/2045-3701-1-31
- 687 Ye, D., Zhang, T., Lou, G., Xu, W., Dong, F., Chen, G., & Liu, Y. (2018). Plasma miR-17, miR-20a,  
688 miR-20b and miR-122 as potential biomarkers for diagnosis of NAFLD in type 2 diabetes  
689 mellitus patients. *Life Sci*, *208*, 201-207. doi:10.1016/j.lfs.2018.07.029
- 690 Zhang, Y., Xu, N., Xu, J., Kong, B., Copple, B., Guo, G. L., & Wang, L. (2014). E2F1 is a novel  
691 fibrogenic gene that regulates cholestatic liver fibrosis through the Egr-1/SHP/EID1  
692 network. *Hepatology*, *60*(3), 919-930. doi:10.1002/hep.27121
- 693

694

695 **Figures and Tables**

**Figure 1. miR-20b significantly increases in the livers of dietary obese mice and human.**

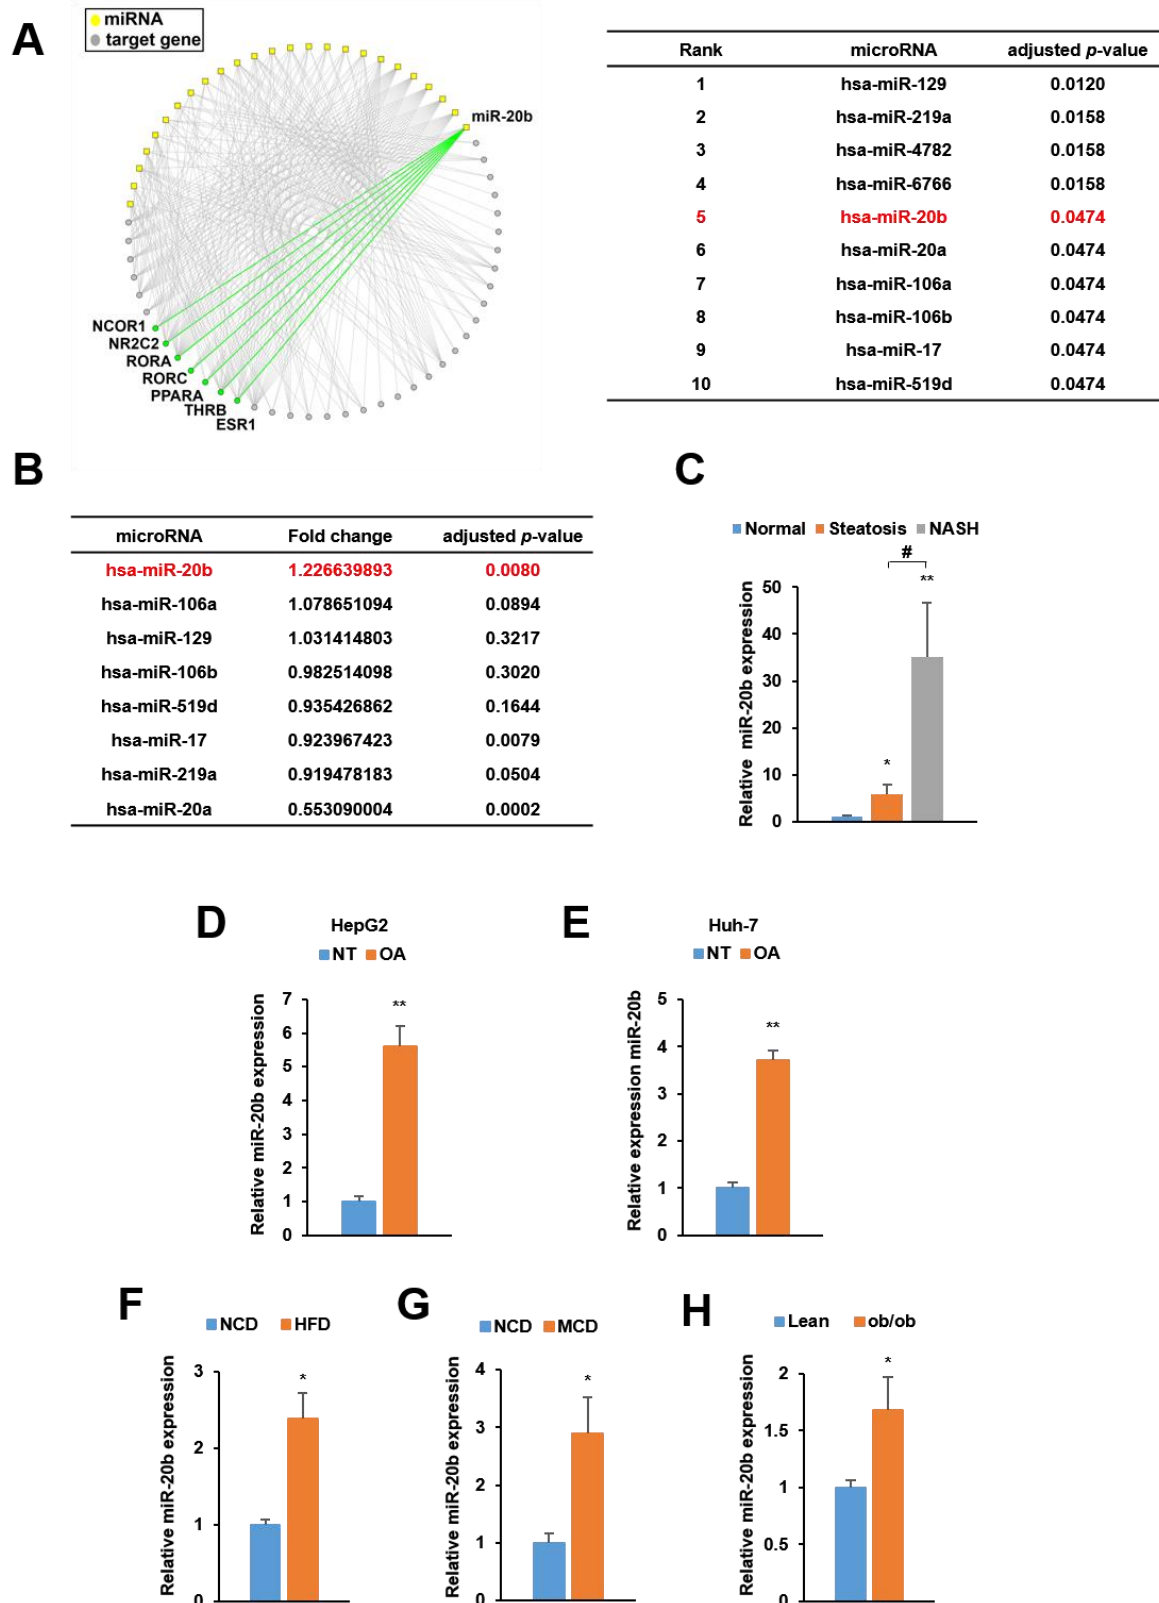

696

697

698

699 **FIGURE 1. miR-20b significantly increases in the livers of dietary obese mice and human.**

700 The miRNA-target genes network was constructed using public hepatic NR transcriptome data from  
701 NAFLD patients (A). The ranked candidates were examined in NAFLD patients compared to normal  
702 individuals using public GSE data (GSE40744) (B). The expression of miR-20b was measured in  
703 indicated condition by quantitative RT-PCR (C-H). Hepatic miR-20b levels of steatosis or NASH  
704 patients were normalized to those of normal individuals. \* $P < 0.05$  and \*\* $P < 0.01$  vs normal  
705 individuals. # $P < 0.05$  vs steatosis patients (C). miR-20b levels from HepG2 cells (D) and Huh-7 cells  
706 (E) treated with OA for 24 h were normalized to no treatment (NT). Hepatic miR-20b levels from  
707 C57BL/6J mice fed a HFD (F), or MCD (G) were normalized to NCD. Hepatic miR-20b levels from  
708 leptin-deficient *ob/ob* mice were normalized to lean wild mice (H). Values represent means  $\pm$  SEM  
709 (n = 3-5). \* $P < 0.05$ , \*\* $P < 0.01$  vs NT in cells or NCD-fed mice.

**Figure 1-figure supplement 1. Clinical characteristics of patients with control individuals (N=5), steatosis (steatosis > 50%, N=4) and NASH patients (N=4).**

| Patients                  | Normal |       |       |       |      | Steatosis |       |       |       | NASH |       |      |       |
|---------------------------|--------|-------|-------|-------|------|-----------|-------|-------|-------|------|-------|------|-------|
|                           | 54     | 45    | 41    | 59    | 58   | 58        | 72    | 54    | 70    | 61   | 67    | 71   | 68    |
| Age (years)               | 54     | 45    | 41    | 59    | 58   | 58        | 72    | 54    | 70    | 61   | 67    | 71   | 68    |
| Gender                    | F      | M     | F     | M     | M    | M         | M     | F     | M     | M    | M     | M    | F     |
| Weight (kg)               | 60.5   | 67    | 66.15 | 73.75 | 51.1 | 59.1      | 70.1  | 54.91 | 62.5  | 73.5 | 58.7  | 58.7 | 65.16 |
| BMI                       | 26.39  | 22.65 | 24.33 | 27.22 | 18.2 | 23.92     | 25.29 | 21.97 | 22.98 | 24.7 | 21.02 | 23.5 | 27.34 |
| AST (IU/L)                | 26     | 13    | 26    | 28    | 18   | 20        | 23    | 28    | 20    | 31   | 58    | 20   | 64    |
| ALT (IU/L)                | 30     | 38    | 20    | 28    | 20   | 33        | 23    | 9     | 16    | 35   | 32    | 21   | 31    |
| GGT (IU/L)                | 30     | N/A   | 33    | 31    | 26   | 26        | 34    | 11    | 38    | 110  | 136   | 37   | 158   |
| ALP (IU/L)                | 47     | 60    | 73    | 74    | 93   | 62        | 70    | 63    | 68    | 99   | 77    | 63   | 88    |
| Billirubin (mg/dL)        | 0.9    | 0.9   | 1.1   | 1.1   | 0.7  | 0.6       | 1     | 0.7   | 0.4   | 0.7  | 0.5   | 0.5  | 0.9   |
| INR                       | 0.97   | 1.06  | 1     | 1.03  | 0.97 | 1         | 0.93  | 1.07  | 1     | 1.01 | 0.97  | 1.09 | 1     |
| Total Cholesterol (mg/dL) | 203    | 88    | 179   | 162   | 178  | 171       | 115   | 169   | 148   | 238  | 161   | 260  | 258   |

710

711



**Figure 2. PPAR $\alpha$  is a direct target of miR-20b.**

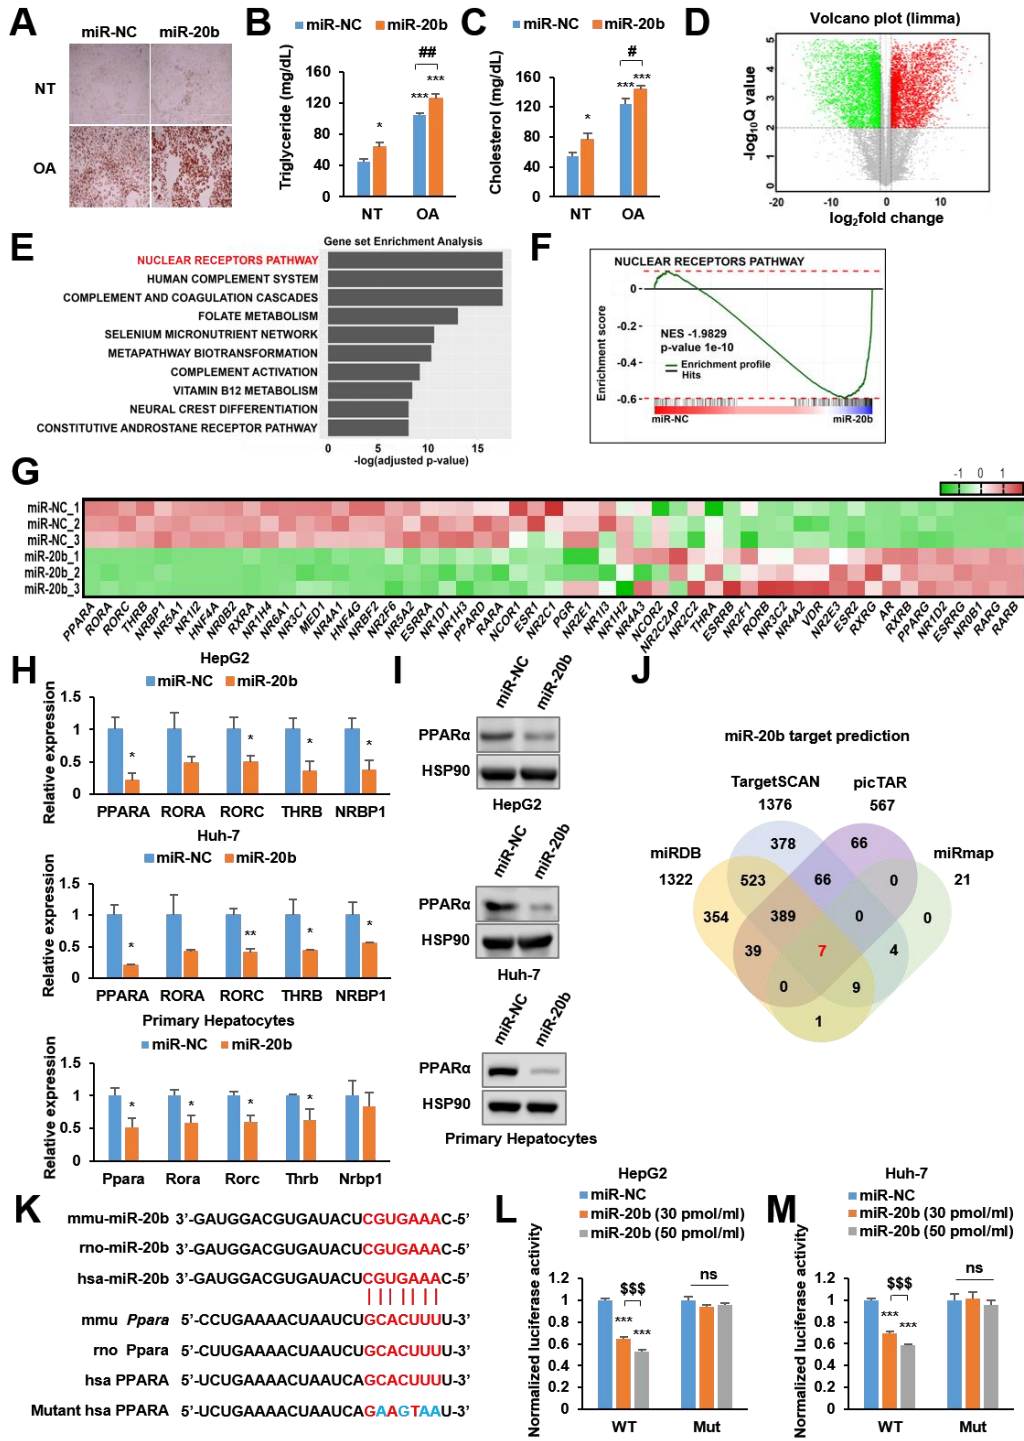

712

713



714 **FIGURE 2. PPAR $\alpha$  is a direct target of miR-20b.**

715 Overexpressed miR-20b induces hepatic steatosis in HepG2 cells treated with OA (1 mM). Oil Red O  
716 staining showed intracellular lipid accumulation in HepG2 cells. Scale bar is 400  $\mu$ m (A). TG (B) and  
717 Cholesterol levels (C) were examined in OA-treated HepG2 cells transfected with miR-NC or miR-20b.  
718 RNA-seq was performed on sample from HepG2 cell with or without overexpression of miR-  
719 20b. Volcano plot of the gene expressions ( $\log_2$  fold change) compared to the negative control from  
720 RNA-seq analysis (D). Top ranked GSEA in overexpressed miR-20b compared to miR-NC in HepG2  
721 cells (E). The primary ranked enrichment plot of nuclear receptors pathway (F). Heatmap of the genes  
722 in NR pathway upon miR-20b overexpression compared to control (G). Expression of primary ranked  
723 nuclear receptors pathway genes from RNA-seq analysis in HepG2 cells, Huh-7 cells, and primary  
724 hepatocytes transfected with miR-20b were normalized to each cells transfected with miR-NC (H).  
725 Western blot analysis of PPAR $\alpha$  on miR-NC or miR-20b transfected cells (I). Venn diagram of  
726 predicted targets for miR-20b in four major database system (J). Graphic image of the conserved  
727 binding motifs of miR-20b within 3'-UTR mRNA of PPARA (K). Luciferase activities of miR-20b-  
728 transfected HepG2 cells and Huh-7 cells containing the luciferase reporter DNA constructs for wild-  
729 type or mutated 3'-UTR of *PPARA* were normalized to those or miR-NC-transfected cells (L, M).  
730 Values represent means  $\pm$  SEM (n = 3). \* $P$  < 0.05, \*\* $P$  < 0.01, \*\*\* $P$  < 0.001 vs miR-NC. # $P$  < 0.05,  
731 ## $P$  < 0.01 vs miR-NC + OA. \$\$\$ $P$  < 0.001 vs miR-20b (30 pmol/ml).

**Figure 2-figure supplement 1. Analysis of PPAR $\alpha$  related pathway in RNA-seq of miR-20b overexpressed HepG2 cells.**

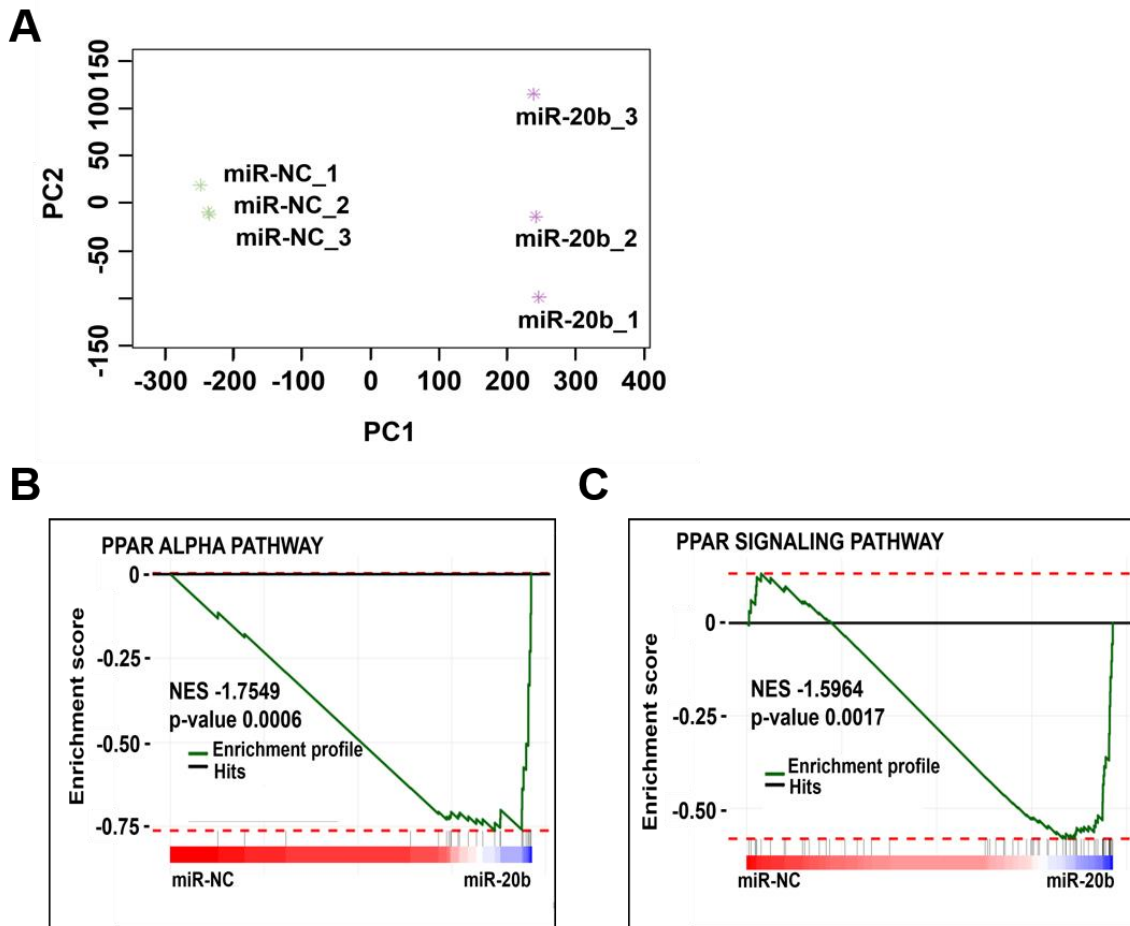

732  
733

**Figure 2-figure supplement 1. Analysis of PPAR $\alpha$  related pathway in RNA-seq of miR-20b overexpressed HepG2 cells.**

734

735 HepG2 cells were transfected either with miR-NC or miR-20b and analyzed by RNA-seq. Analysis of  
736 the miR-20b compared to the negative control (n = 3) *via* PCA plot from RNA-seq data (A). Gene set  
737 enrichment pathway analysis of PPAR $\alpha$ -related pathways, including PPARA pathway and PPAR  
738 signaling pathway in overexpressed miR-20b compared to miR-NC (B, C).

**Figure 2-figure supplement 2. PPAR $\alpha$  is the primary target of the overlapped candidates.**

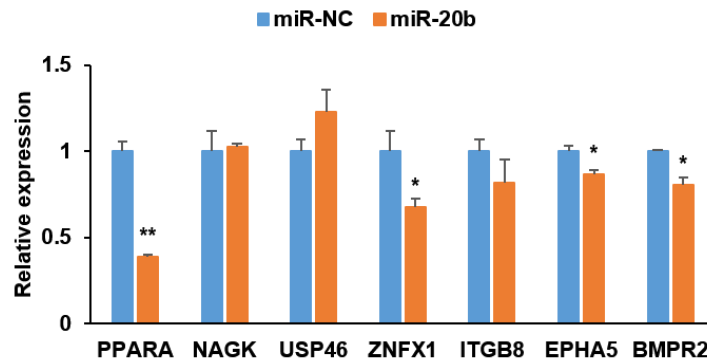

739

740 **Figure 2-figure supplement 2. PPAR $\alpha$  is the primary target of the overlapped candidates.**

741 The seven predicted miR-20b targets were overlapped (PPARA, NAGK, USP46, ZNFX1, ITGB8,  
742 EPHA5, BMPR2). HepG2 cells were transfected with miR-NC or miR-20b and the expression of  
743 seven predicted miR-20b targets were measured by quantitative RT-PCR. Relative values are  
744 normalized to miR-NC. Values represent means  $\pm$  SEM (n = 3). \* $P$  < 0.05, \*\* $P$  < 0.01 vs miR-NC.

**Figure 3. miR-20b regulates fatty acid metabolism.**

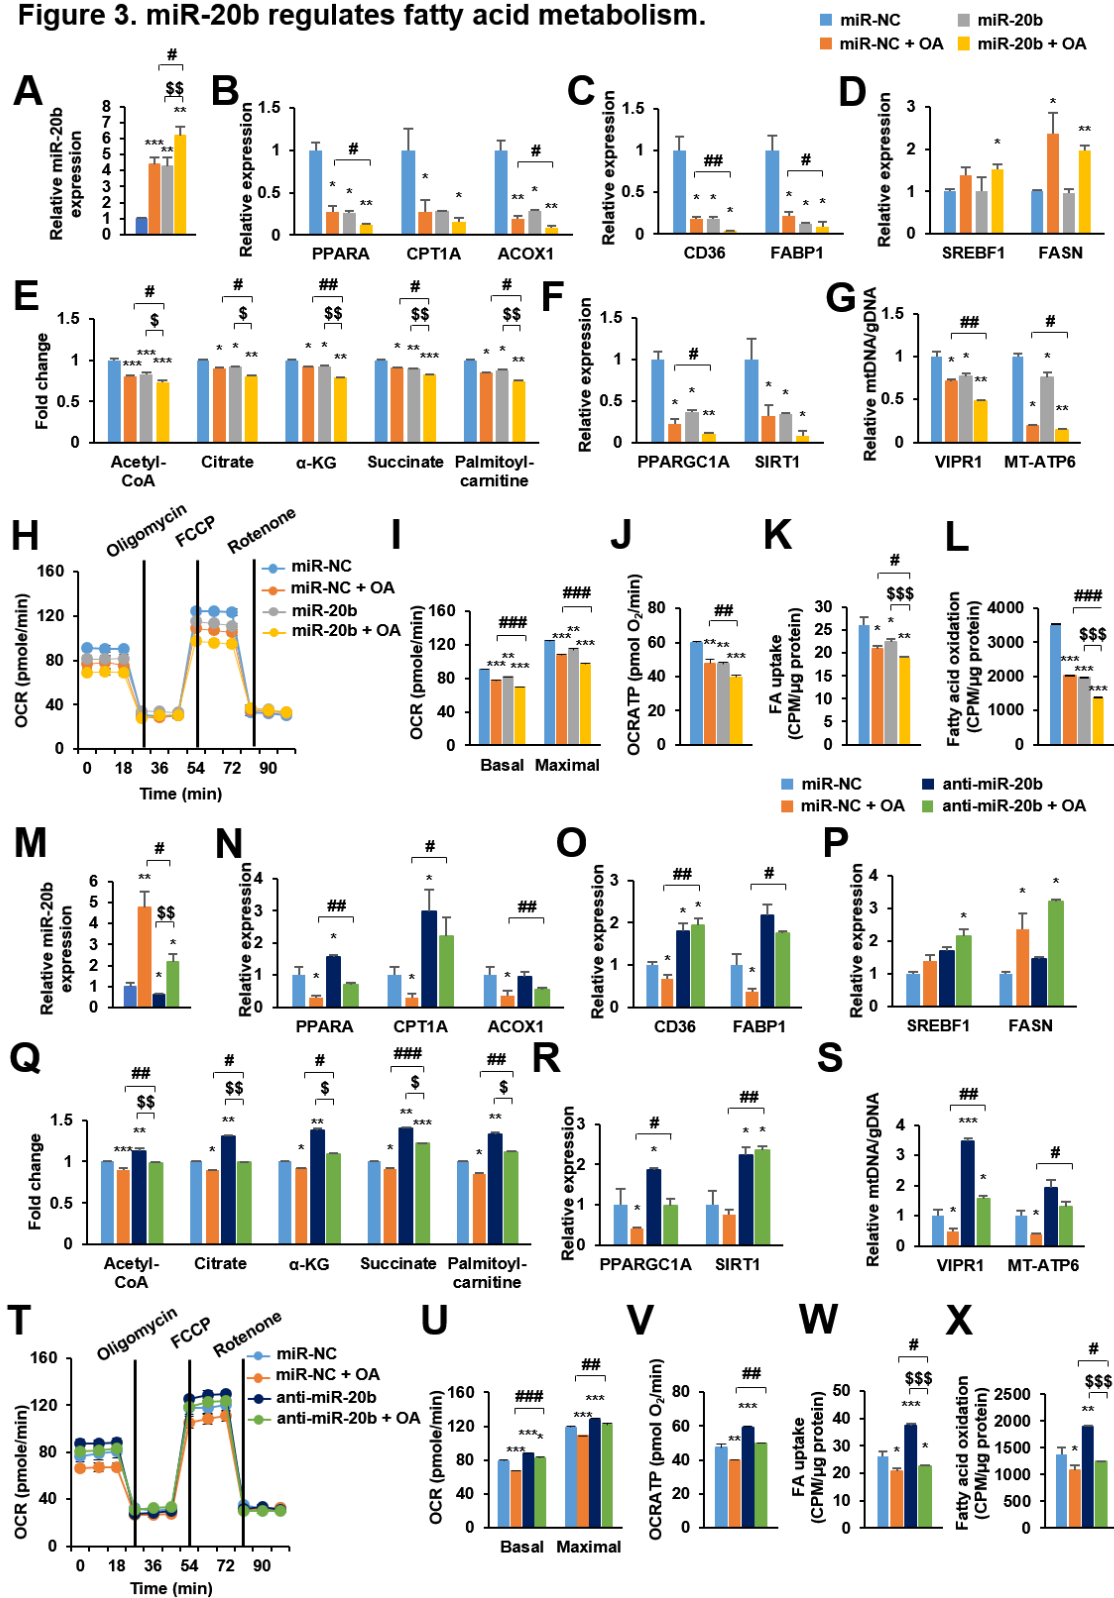

745

746

747 **FIGURE 3. miR-20b regulates fatty acid metabolism.**

748 HepG2 cells were transfected with miR-20b or anti-miR-20b and treated with OA for 24 h. The  
749 expression of miR-20b (A, M) and genes related to FA  $\beta$ -oxidation (B, N), FA uptake (C, O), and  
750 lipogenesis (D, P) were measured by quantitative RT-PCR. Representative mitochondrial metabolites  
751 were measured in HepG2 cells (E, Q). The expression of genes related to mitochondrial biogenesis (F,  
752 R) were measured by quantitative RT-PCR. The mitochondrial copy of VIPR1 and MT-ATP6 were  
753 determined (G, S). OCR (H, T), basal and maximal OCR (I, U), and ATP levels (J, V) were measured  
754 in HepG2 cells. FA uptake (K, W) and  $\beta$ -oxidation (L, X) activity were measured using [9,10-<sup>3</sup>H(N)]-  
755 Palmitic Acid and normalized to the total protein content. Relative values are normalized to miR-NC.  
756 Values represent means  $\pm$  SEM (n = 3-5). \* $P$  < 0.05, \*\* $P$  < 0.01, \*\*\* $P$  < 0.001 vs miR-NC. # $P$  < 0.05,  
757 ## $P$  < 0.01, ### $P$  < 0.001 vs miR-20b or anti-miR-20b, respectively. \$ $P$  < 0.05, \$\$ $P$  < 0.01, \$\$\$ $P$  < 0.001  
758 vs miR-NC + OA.

**Figure 3-figure supplement 1. The expression of PPAR $\alpha$  is regulated both in human and mice.**

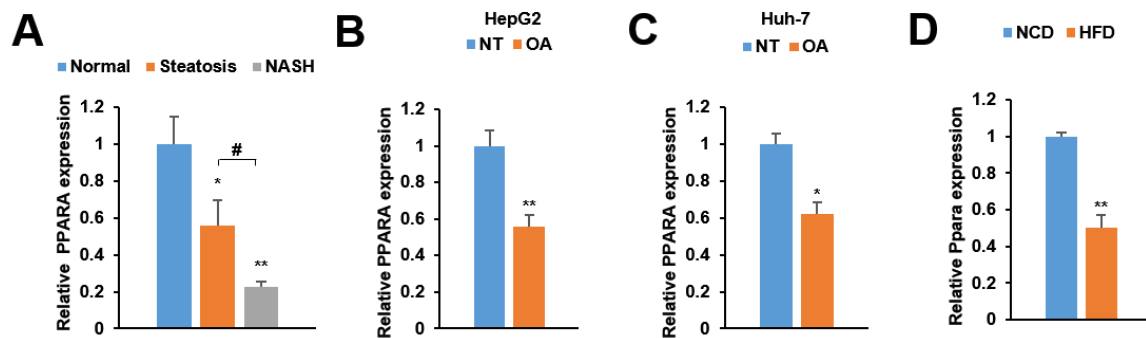

759

760 **Figure 3-figure supplement 1. The expression of PPAR $\alpha$  is regulated both in human and mice.**

761 The expression of PPAR $\alpha$  was measured in human patients, mice liver tissues, HepG2, and Huh-7  
762 cells by quantitative RT-PCR. Hepatic PPAR $\alpha$  expression levels of steatosis or NASH patients were  
763 normalized to those of normal individuals. \* $P < 0.05$  and \*\* $P < 0.01$  vs normal individuals. # $P < 0.05$  vs  
764 steatosis patients (A). PPAR $\alpha$  expression levels from HepG2 cells (B) and Huh-7 cells (C)  
765 treated with OA for 24 h were normalized to no treatment (NT). Hepatic Ppara expression levels from  
766 C57BL/6J mice fed a HFD (D) were normalized to NCD. Values represent means  $\pm$  SEM (n = 3-5).  
767 \* $P < 0.05$ , \*\* $P < 0.01$  vs NT in cells or NCD-fed mice.

### Figure 3-figure supplement 2. miR-20b induces hepatic steatosis in primary hepatocytes

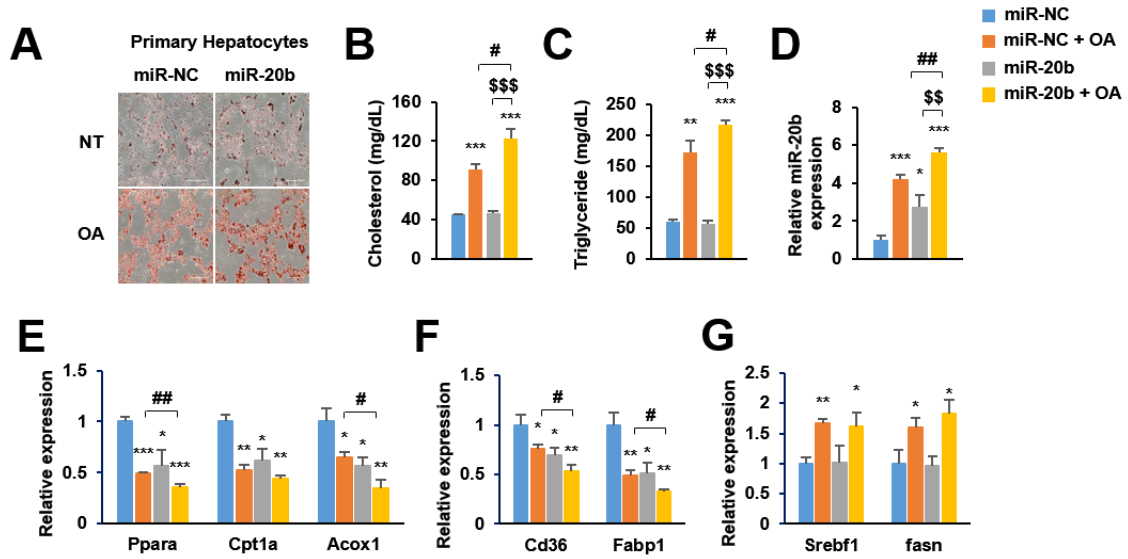

768

769 **Figure 3-figure supplement 2. miR-20b induces hepatic steatosis in primary hepatocytes.**

770 Primary hepatocytes were transfected with miR-NC or miR-20b, subsequently treated with OA (1  
 771 mM). Representative Oil Red O staining revealed intracellular lipid accumulation (A). The level of  
 772 triglyceride (B) and cholesterol (C) were analyzed. The expression of miR-20b (D) and genes related  
 773 to FA β-oxidation (E), FA uptake (F), and lipogenesis (G) were measured by quantitative RT-PCR.  
 774 Values represent means ± SEM (n = 3). \**P* < 0.05, \*\**P* < 0.01, \*\*\**P* < 0.001 vs miR-NC. #*P* < 0.05,  
 775 ##*P* < 0.01, vs miR-NC + OA. \$\$*P* < 0.01, \$\$\$*P* < 0.001, vs miR-20b.

### Figure 3-figure supplement 3. Ketogenesis is not regulated by miR-20b in HepG2 cells.

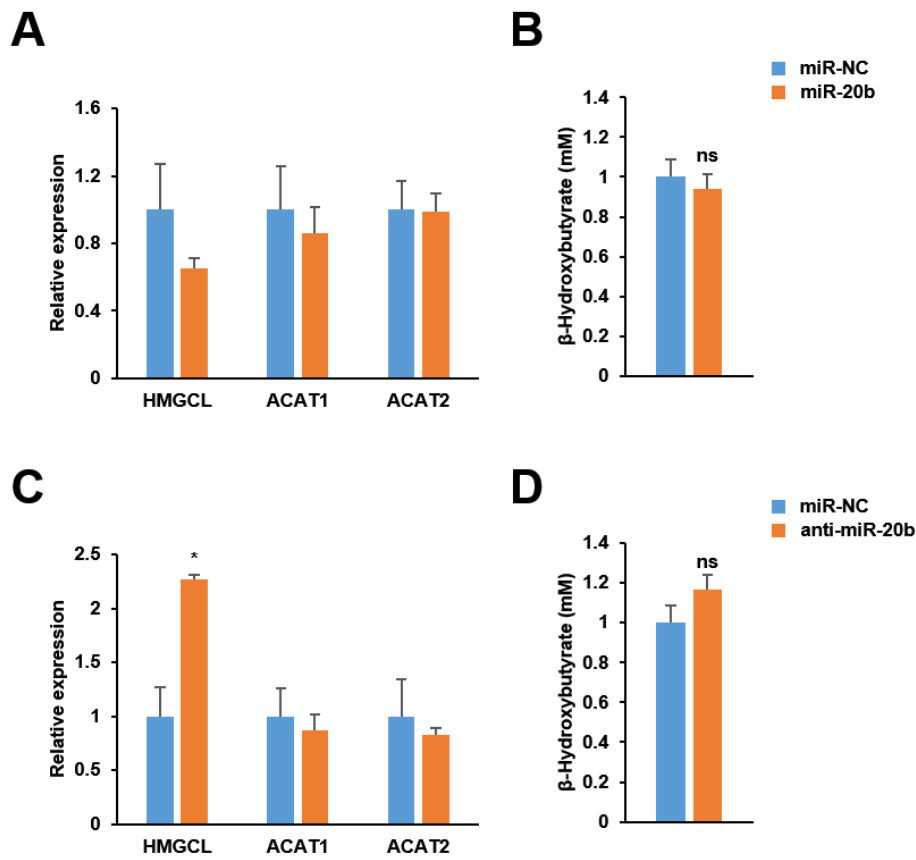

776

### 777 Figure 3-figure supplement 3. Ketogenesis is not affected by miR-20b in HepG2 cells.

778 HepG2 cells were transfected with miR-20b, anti-miR-20b, or miR-NC as control. Genes involved in  
779 ketogenesis- *HMGCL*, *ACAT1* and *ACAT2*- were measured by quantitative RT-PCR. Relative values  
780 are normalized to miR-NC (A, C). The concentration of  $\beta$ -hydroxybutyrate which generated by  
781 ketogenesis was examined in HepG2 cells using  $\beta$ -hydroxybutyrate assay kit (ab83390, abcam) (B,  
782 D). Values represent means  $\pm$  SEM (n = 3). \* $P < 0.05$ , \*\* $P < 0.01$ , \*\*\* $P < 0.001$  vs miR-NC.



**Figure 3-figure supplement 4. Inhibition of miR-20b alleviates hepatic steatosis in HepG2 cells.**

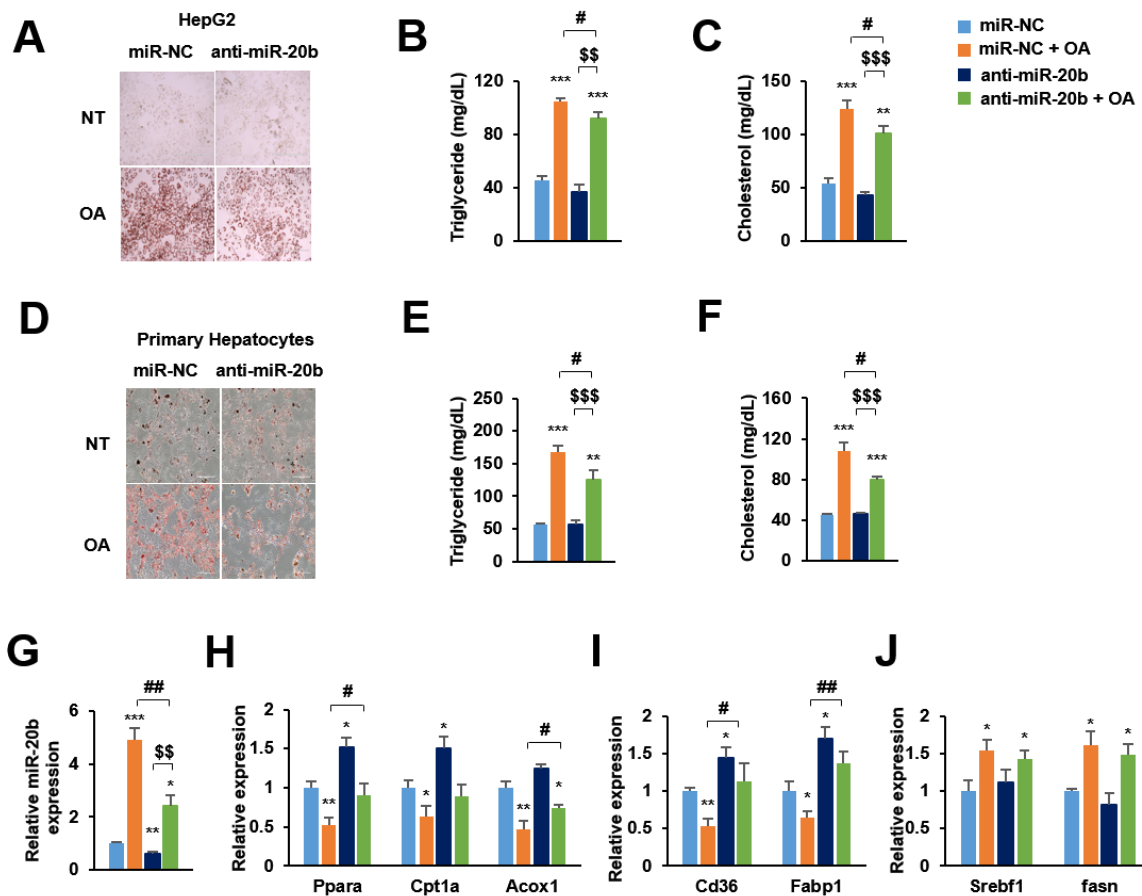

783

784

**Figure 3-figure supplement 4. Inhibition of miR-20b alleviates hepatic steatosis in HepG2 cells.**

785

HepG2 cells and primary hepatocytes were transfected with miR-NC or anti-miR-20b, subsequently treated with OA (1 mM). Representative Oil Red O staining revealed intracellular lipid accumulation (A

786

and D). The level of triglyceride (B and E) and cholesterol (C and F) were analyzed. The expression

787

of miR-20b (G) and genes related to FA  $\beta$ -oxidation (H), FA uptake (I), and lipogenesis (J) were

788

measured by quantitative RT-PCR. Values represent means  $\pm$  SEM (n = 3). \*P < 0.05, \*\*P < 0.01,

789

\*\*\*P < 0.001 vs miR-NC. # P < 0.05, ## P < 0.01 vs miR-NC+OA. \$\$ P < 0.01, \$\$\$ P < 0.001 vs anti-miR-

790

20b.

791

**Figure 4. miR-20b promotes hepatic steatosis in HFD-fed mice**

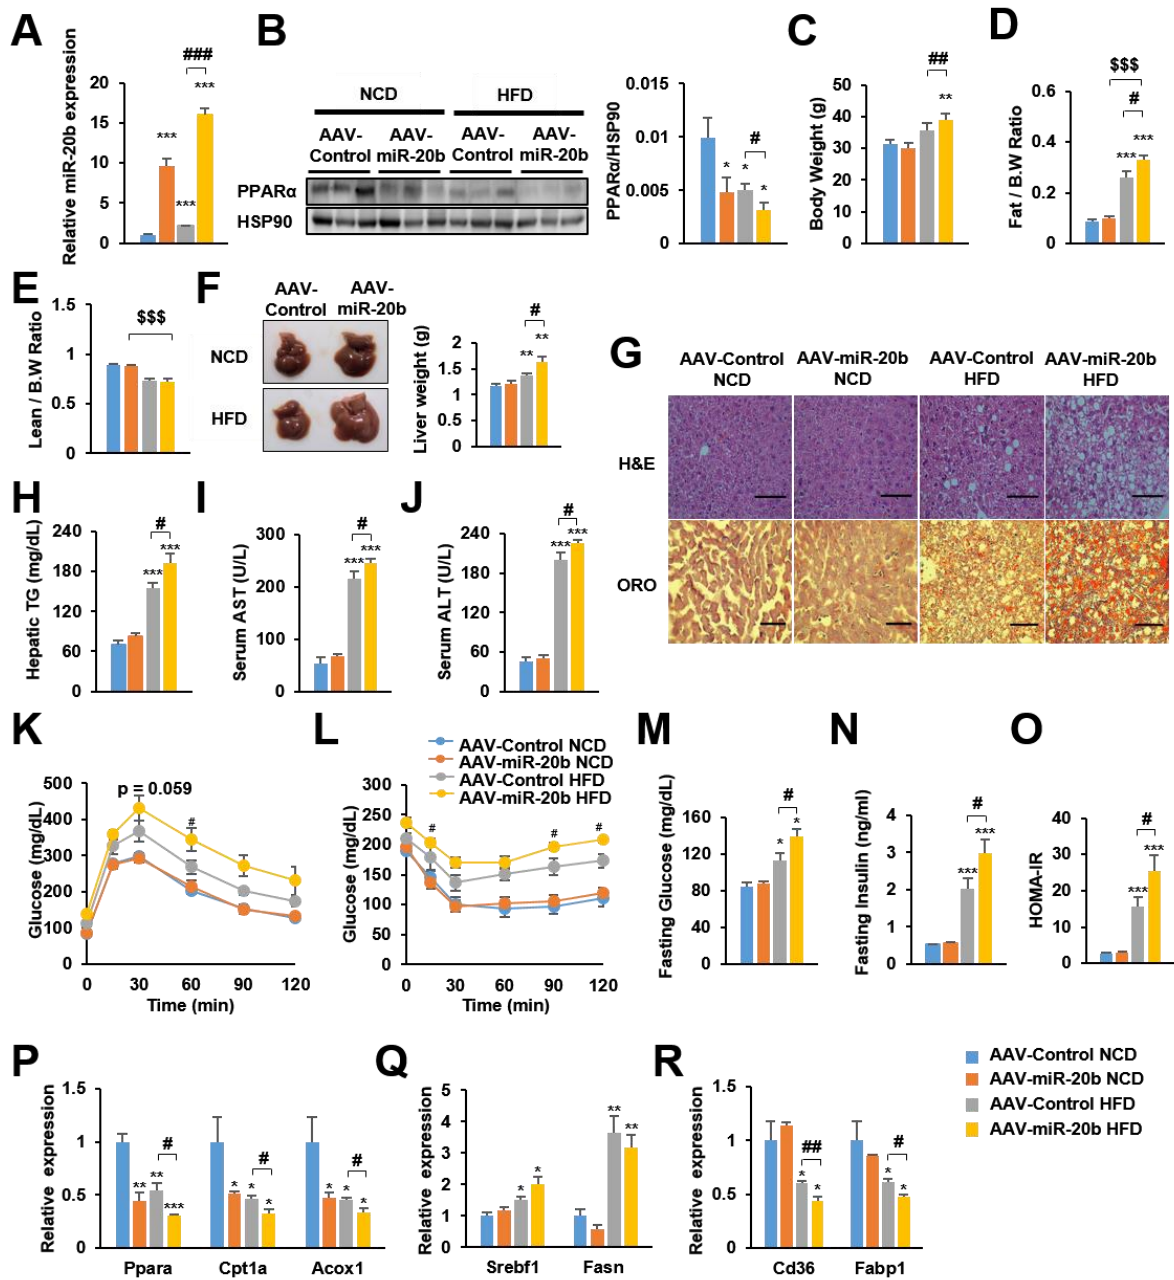

792

793

794 **FIGURE 4. miR-20b promotes hepatic steatosis in HFD-fed mice**

795 C57BL/6J mice were fed a NCD or a HFD for 12 weeks with administration of indicated AAV (n = 5  
796 per group). Hepatic expression of miR-20b (A) and PPAR $\alpha$  (B), body weight (C), the ratio of fat mass  
797 to body weight (D), the ratio of lean mass to body weight (E), representative images of liver and liver  
798 weight (F), representative images of H&E staining and Oil Red O staining of liver slides (G), hepatic  
799 TG (H), serum AST (I), and serum ALT (J), glucose tolerance (K), insulin tolerance (L), fasting  
800 glucose (M), fasting insulin (N), and HOMA-IR (O) were analyzed in indicated mice. Genes related to  
801 FA  $\beta$ -oxidation (P), lipogenesis (Q) and FA uptake (R) were determined by quantitative RT-PCR.  
802 Relative values are normalized to AAV-Control NCD. Values represent means  $\pm$  SEM (n = 5).  
803 \* $P$  < 0.05, \*\* $P$  < 0.01, \*\*\* $P$  < 0.001 vs AAV-Control NCD. # $P$  < 0.05, ## $P$  < 0.01, ### $P$  < 0.001 vs AAV-  
804 Control HFD. \$\$\$ $P$  < 0.001 vs AAV-miR-20b NCD. Scale bar is 100 $\mu$ m

Figure 4-figure supplement 1. The expression of miR-20b in peripheral tissues.

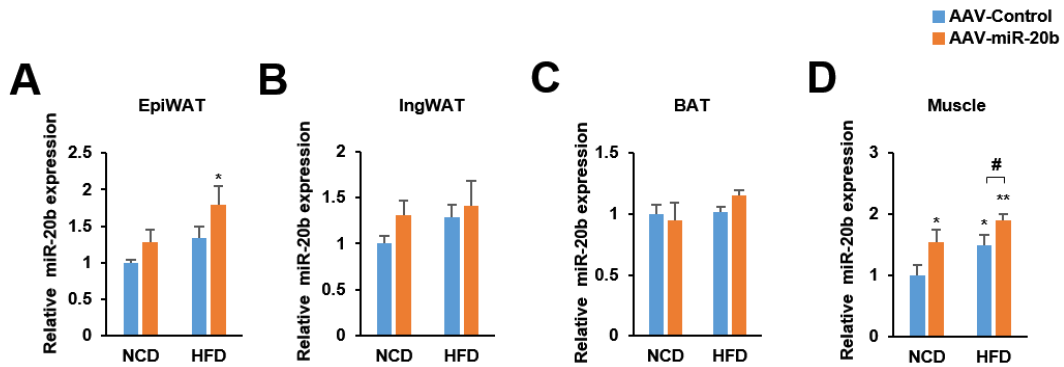

805  
806

Figure 4-figure supplement 1. The expression of miR-20b in peripheral tissues.

807 C57BL/6J fed on normal chow diet (NCD, n = 5 per group) or high fat diet (HFD, n = 5 per group) for  
808 12 weeks with administered of indicated AAV. All tissues were harvested at the same time.  
809 Quantitative RT-PCR analysis of miR-20b expression in epididymal white adipose tissue (a), inguinal  
810 white adipose tissue (b), brown adipose tissue (c), and muscle (d) in AAV-Control or AAV-miR-20b  
811 injected mice. Relative values are normalized to AAV-Control. Values represent means  $\pm$  SEM (n = 5).

812 \* $P < 0.05$ , \*\* $P < 0.01$  vs AAV-Control NCD. #  $P < 0.05$  vs AAV-Control HFD.

813

## Figure 4-figure supplement 2. The weight of peripheral tissues with AAV-miR-20b

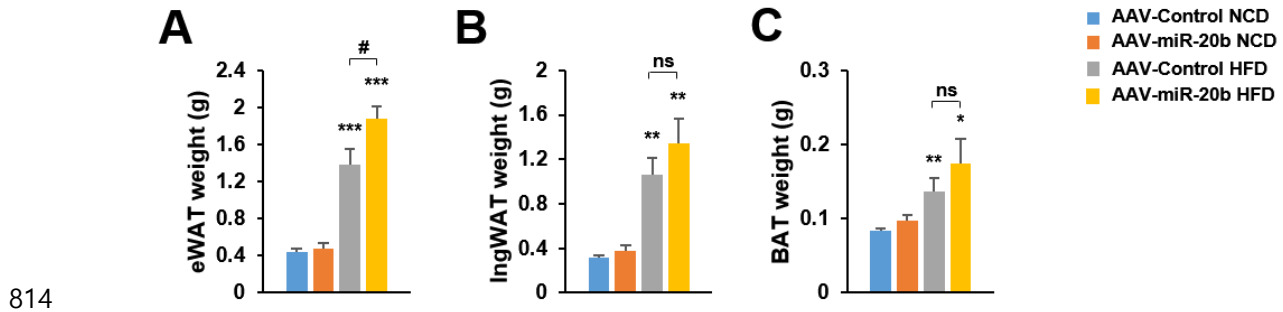

814

815 **Figure 4-figure supplement 2. The weight of peripheral tissues with AAV-miR-20b.**

816 C57BL/6J fed on normal chow diet (NCD, n = 5 per group) or high fat diet (HFD, n = 5 per group) for  
817 12 weeks with administration of indicated AAV. All tissues were harvested at the same time. Wet  
818 weight of epididymal white adipose tissue (A), inguinal white adipose tissue (B), and brown adipose  
819 tissue (C) in AAV-Control or AAV-miR-20b injected mice. Values represent means  $\pm$  SEM (n = 5). ns,  
820 not significant. \* $P < 0.05$ , \*\* $P < 0.01$ , \*\*\* $P < 0.001$  vs AAV-Control NCD. #  $P < 0.05$  vs AAV-Control HFD.

**Figure 5. Inhibition of miR-20b alleviates hepatic steatosis in HFD-fed mice.**

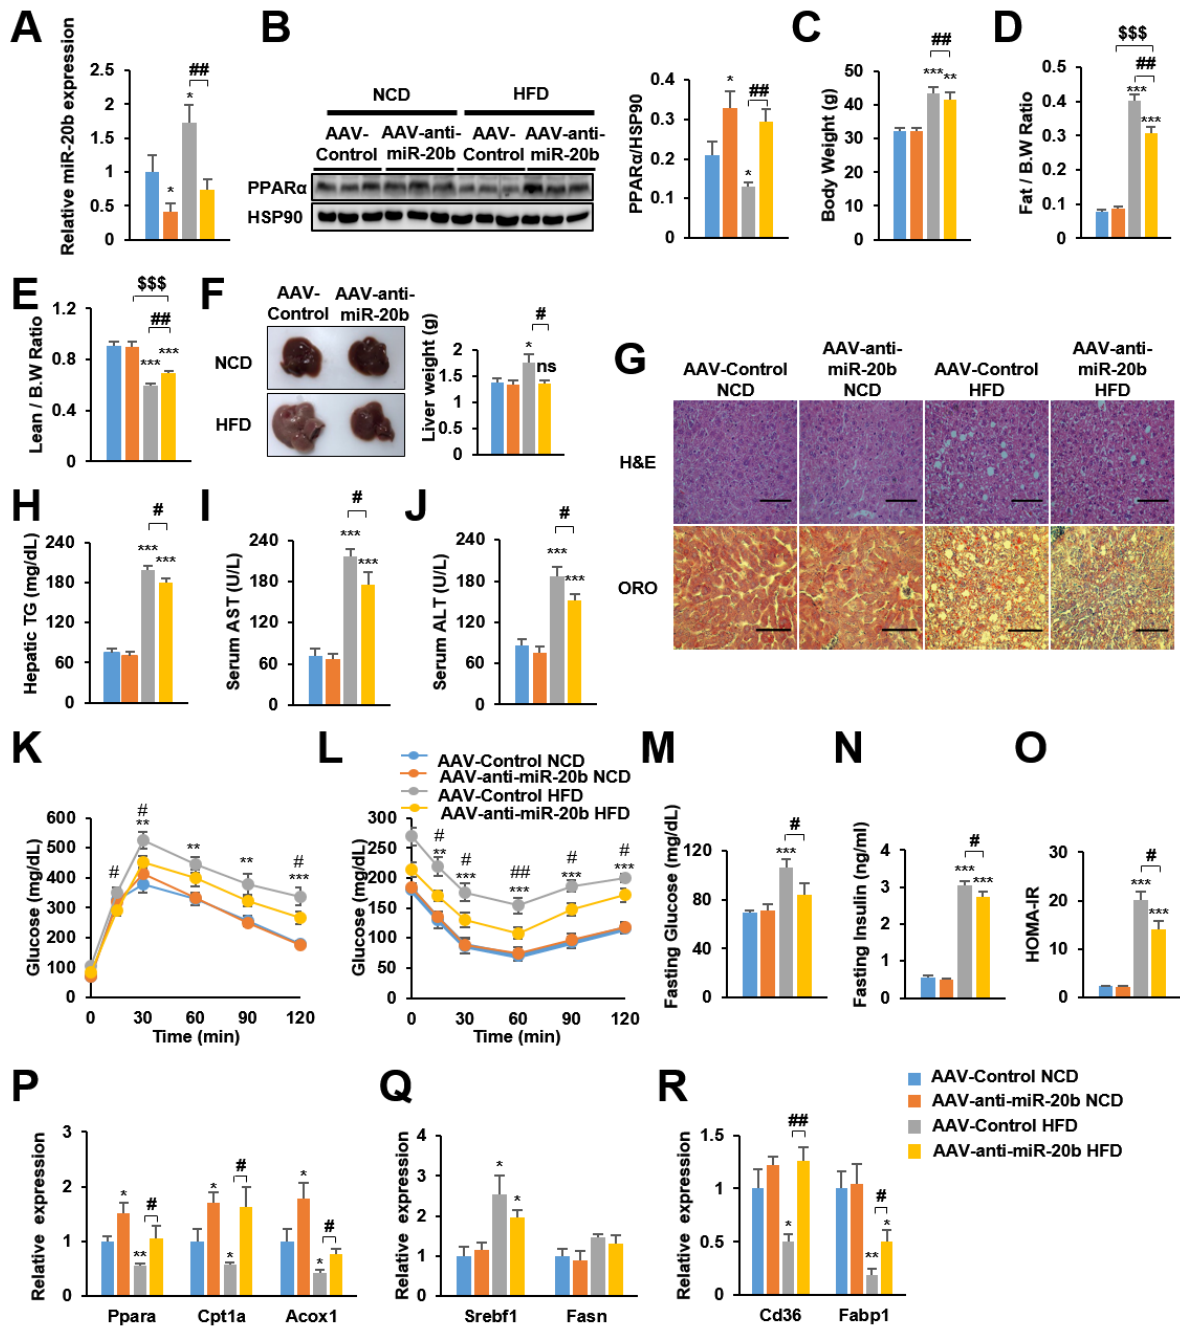

821

822

823 **FIGURE 5. Inhibition of miR-20b alleviates hepatic steatosis in HFD-fed mice.**

824 C57BL/6J mice were a NCD or a HFD for 12 weeks with administration of indicated AAV (n = 5 per  
825 group). Hepatic miR-20b (A) and PPAR $\alpha$  expression (B), body weight (C), the ratio of fat mass to  
826 body weight (D), the ratio of lean mass to body weight (E), representative images of liver and liver  
827 weight (F), representative images of H&E staining and Oil Red O staining of liver slides (G), hepatic  
828 TG (H), serum AST (I), serum ALT (J), glucose tolerance (K), insulin tolerance (L), fasting glucose (M),  
829 fasting insulin (N), and HOMA-IR (O) were analyzed in indicated mice. Scale bar is 100 $\mu$ m. Genes  
830 related to FA  $\beta$ -oxidation (P), lipogenesis (Q) and FA uptake (R) were determined by quantitative RT-  
831 PCR. Relative values are normalized to AAV-Control NCD. Values represent means  $\pm$  SEM (n = 5).  
832 ns, not significant, \* $P$  < 0.05, \*\* $P$  < 0.01, \*\*\* $P$  < 0.001 vs AAV-Control NCD. # $P$  < 0.05, ## $P$  < 0.01 vs  
833 AAV-Control HFD. \$\$\$ $P$  < 0.001 vs AAV-anti-miR-20b NCD.

**Figure 5-figure supplement 1. The weight of peripheral tissues with AAV-anti-miR-20b**

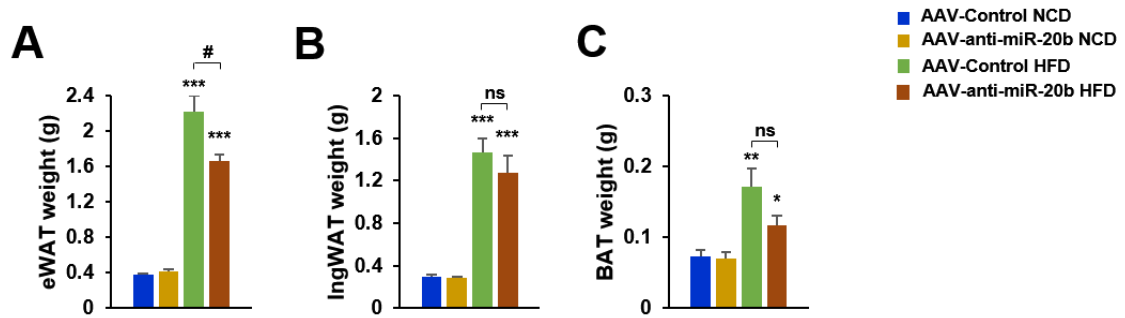

834

835 **Figure 5-figure supplement 1. The weight of peripheral tissues with AAV-anti-miR-20b.**

836 C57BL/6J fed on normal chow diet (NCD, n = 5 per group) or high fat diet (HFD, n = 5 per group) for  
837 12 weeks with administration of indicated AAV. All tissues were harvested at the same time. Wet  
838 weight of epididymal white adipose tissue (A), inguinal white adipose tissue (B), and brown adipose  
839 tissue (C) in AAV-Control or AAV-anti-miR-20b injected mice. Values represent means  $\pm$  SEM (n = 5).  
840 ns, not significant. \* $P < 0.05$ , \*\* $P < 0.01$ , \*\*\* $P < 0.001$  vs AAV-Control NCD. #  $P < 0.05$  vs AAV-Control  
841 HFD.



**Figure 6. The effects of miR-20b are mediated by PPAR $\alpha$ .**

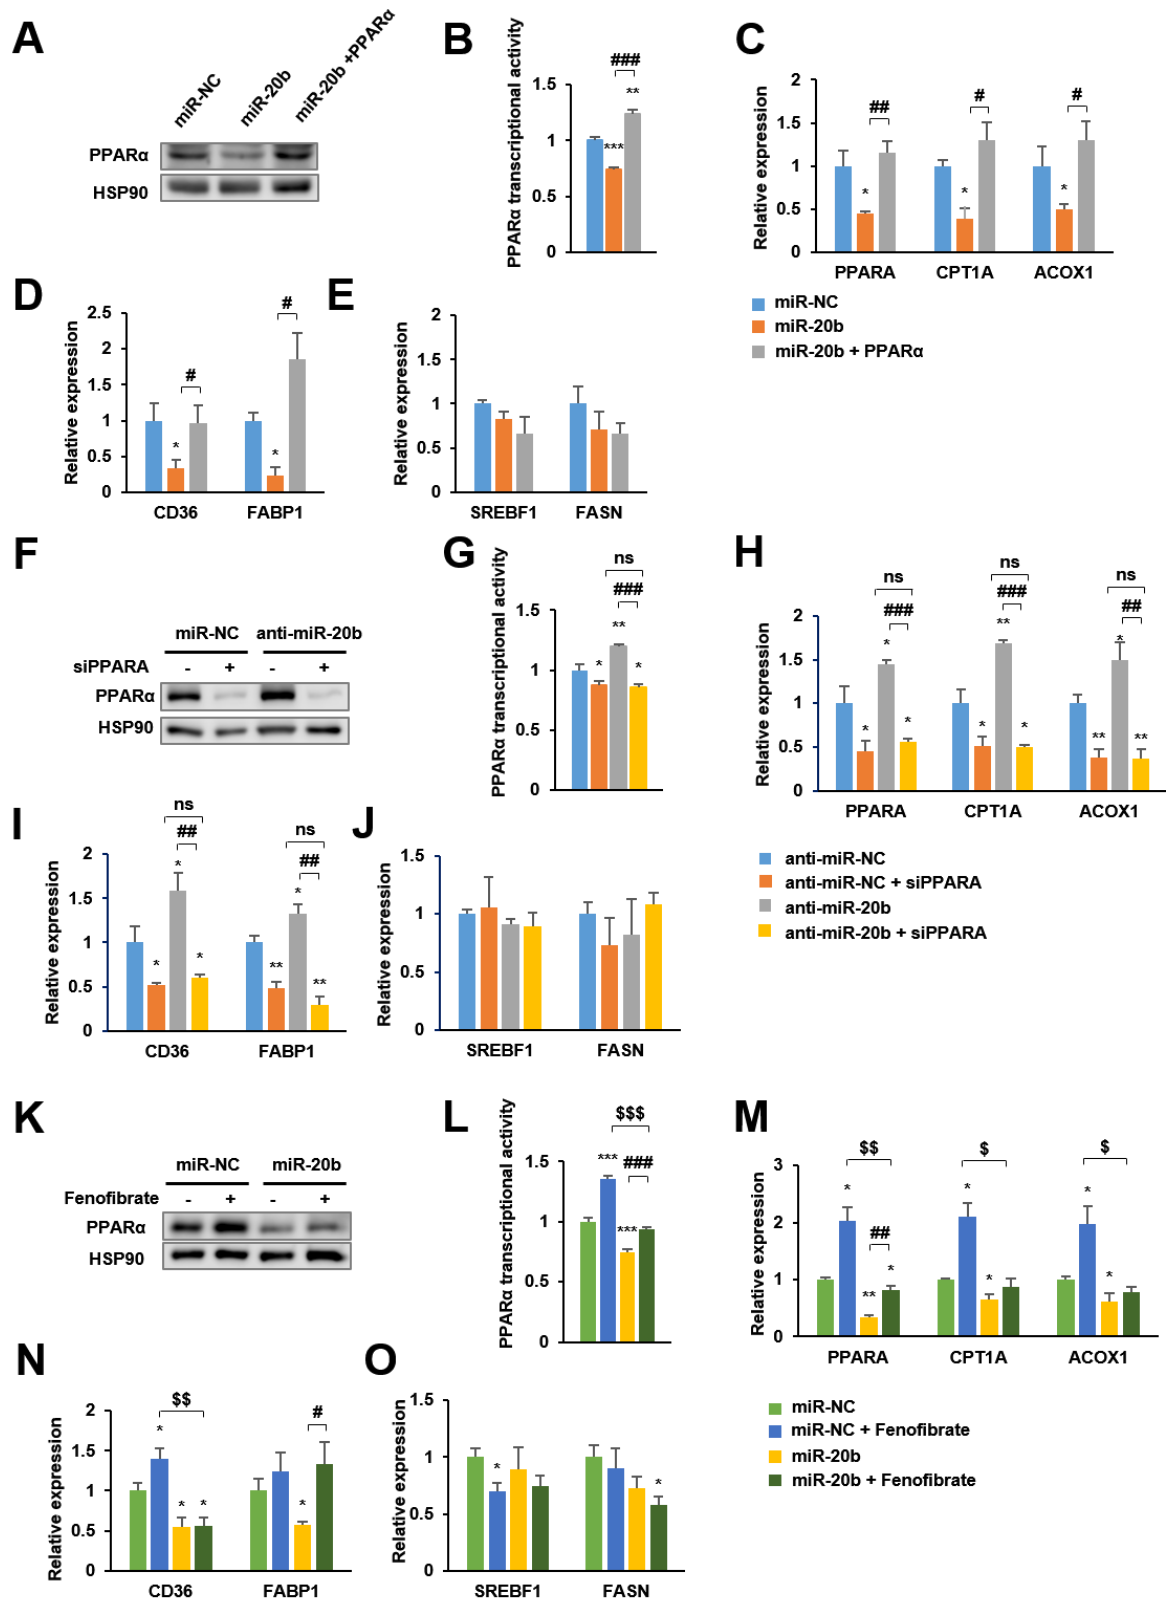

842

843

844 **FIGURE 6. The effects of miR-20b are mediated by PPAR $\alpha$ .**

845 HepG2 cells transfected with indicated miRNA, siRNA, or PPARA expression vector. Western blot  
846 analysis of PPAR $\alpha$  (A, F). Luciferase activity using the luciferase reporter DNA constructs containing  
847 PPRE (PPAR response element) was transfected in HepG2 cells. Luciferase activity was normalized  
848 to renilla activity (B, G). mRNAs level of FA  $\beta$ -oxidation, FA uptake, and lipogenesis were analyzed by  
849 real-time qPCR (C-E and H-J). After transfected with miR-NC or miR-20b, HepG2 cells were treated  
850 with fenofibrate (100  $\mu$ M). Protein level of PPAR $\alpha$  was analyzed by western blot (K). The  
851 transcriptional activity of PPAR $\alpha$  was measured (L). Genes involved in of FA  $\beta$ -oxidation, lipogenesis  
852 and FA uptake were determined by real-time qPCR (M-O). Relative values are normalized to miR-NC.  
853 Values represent means  $\pm$  SEM (n = 3). \* $P$  < 0.05, \*\* $P$  < 0.01, \*\*\* $P$  < 0.001 vs miR-NC. # $P$  < 0.05,  
854 ## $P$  < 0.01, ### $P$  < 0.001 vs miR-20b. \$ $P$  < 0.05, \$\$ $P$  < 0.01, \$\$\$ $P$  < 0.001 vs miR-NC + Fenofibrate.

**Figure 7. The effects of fenofibrate are limited in miR-20b-introduced mice.**

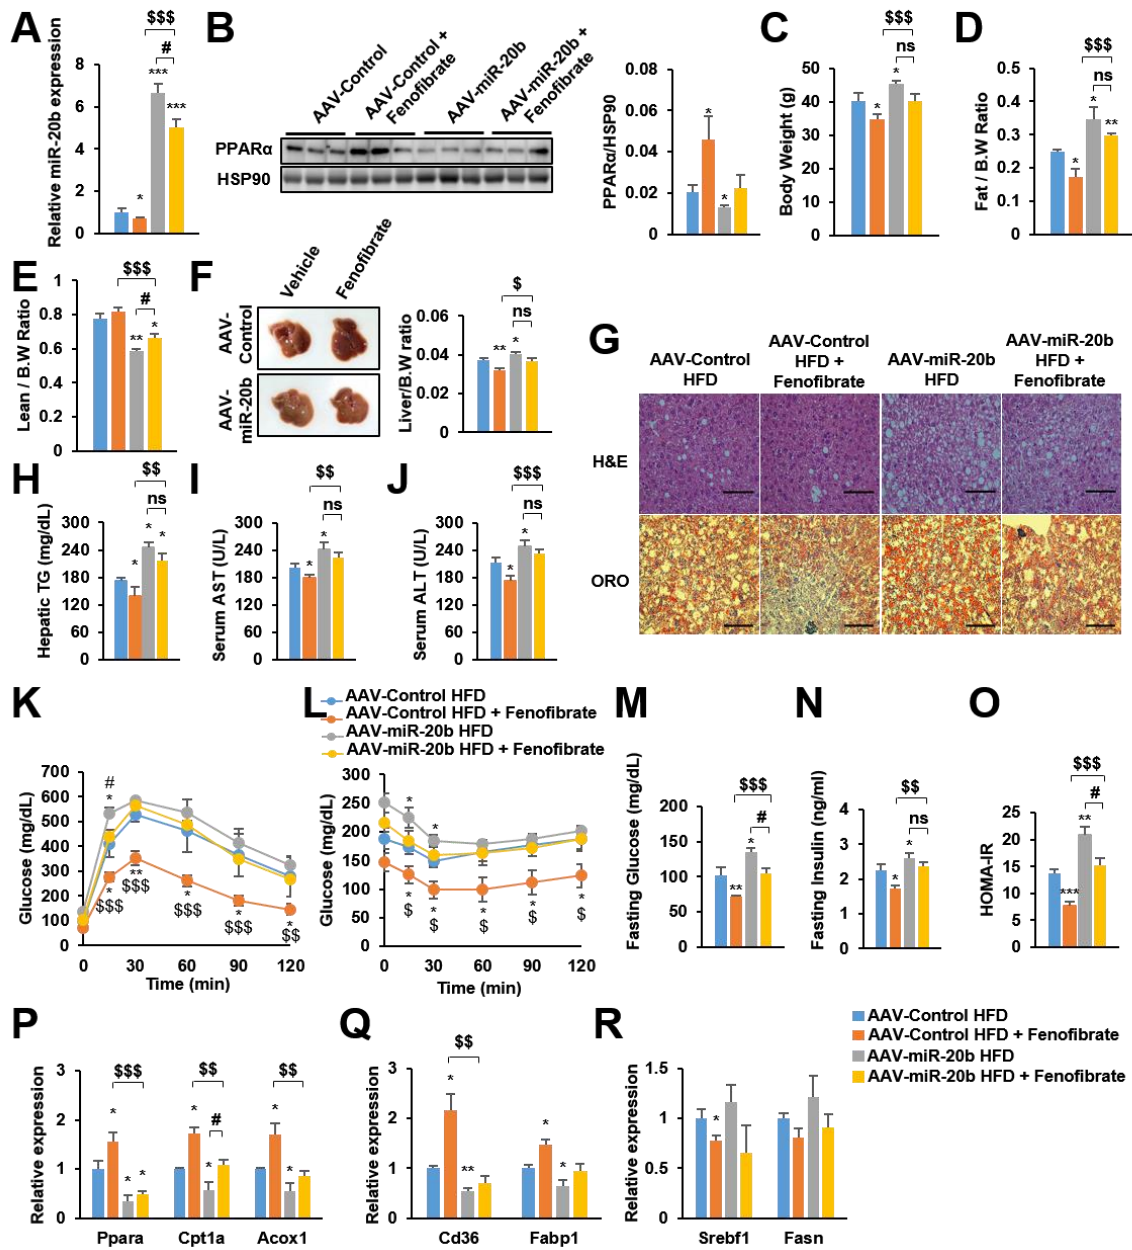

855

856

857 **FIGURE 7. The effects of fenofibrate are limited in miR-20b-introduced mice.**

858 C57BL/6J mice were fed a NCD or a HFD for 12 weeks with administration of indicated AAV (n = 5  
859 per group). Then, mice injected with vehicle or fenofibrate (100 mg/kg) for 4 weeks. Hepatic miR-20b  
860 (A) and PPAR $\alpha$  expression (B), body weight (C), the ratio of fat mass to body weight (D), the ratio of  
861 lean mass to body weight (E), representative images of liver and liver weight (F), representative  
862 images of H&E staining and Oil Red O staining of liver slides (G), hepatic TG (H), serum AST (I),  
863 serum ALT (J), glucose tolerance (K), insulin tolerance (L), fasting glucose (M), fasting insulin (N), and  
864 HOMA-IR (O) were analyzed in indicated mice. Scale bar is 100 $\mu$ m. Genes related to FA  $\beta$ -oxidation  
865 (P), FA uptake (Q), and lipogenesis (R) were determined by quantitative RT-PCR. Relative values are  
866 normalized to AAV-Control HFD. Values represent means  $\pm$  SEM (n = 5). \* $P$  < 0.05, \*\* $P$  < 0.01,  
867 \*\*\* $P$  < 0.001 vs AAV-Control HFD. ns, not significant, # $P$  < 0.05 vs AAV-miR-20b HFD. \$\$ $P$  < 0.01,  
868 \$\$\$ $P$  < 0.001 vs AAV-Control HFD + Fenofibrate.

869

870

**Figure 8. miR-20b promotes liver inflammation and fibrosis in MCD-Fed Mice.**

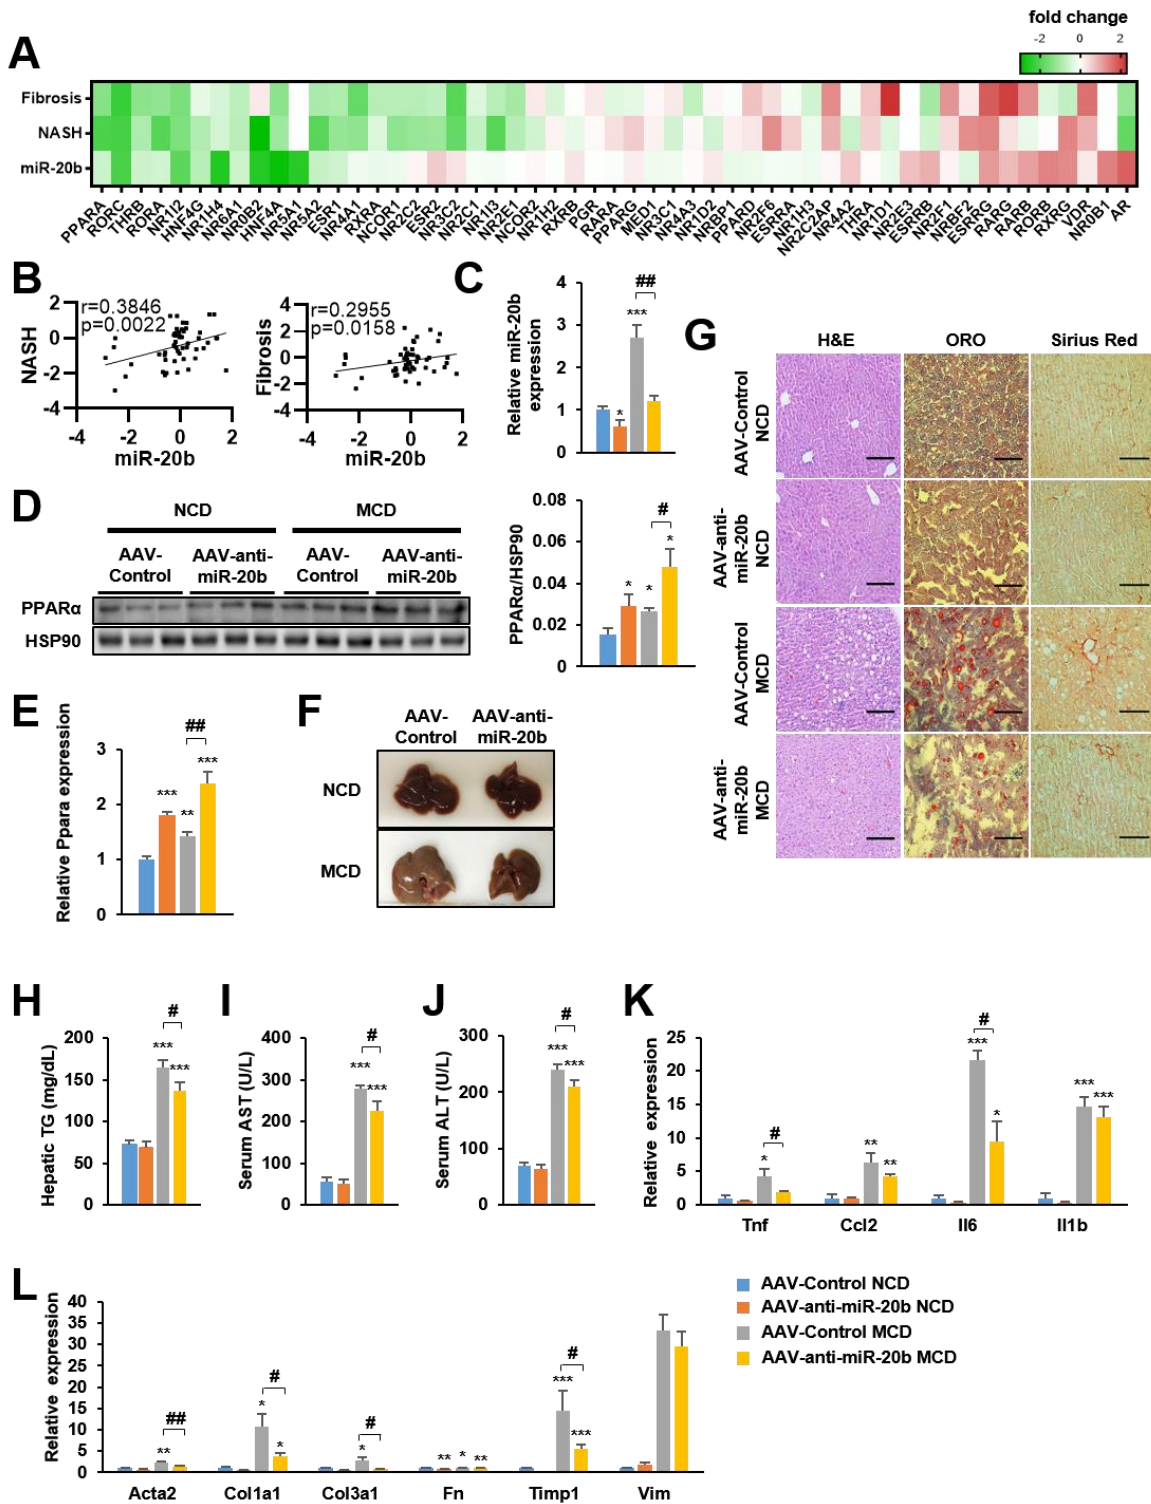

871

872

873 **FIGURE 8. miR-20b promotes liver inflammation and fibrosis in MCD-Fed Mice.**

874 Heatmap (A) and correlation (B) of hepatic nuclear receptor gene expression in RNA-seq (Figure 2)  
875 with public databases of liver fibrosis or NASH patients. The values are fold change compared to  
876 each control samples. C57BL/6J were fed a NCD or a MCD for 4 weeks with administration of  
877 indicated AAV (n = 5 per group). Before 1 week of MCD challenge, mice were injected with AAV-  
878 Control or AAV-anti-miR-20b. Hepatic miR-20b (C) and PPAR $\alpha$  expression(D, E), representative  
879 images of liver (F), H&E staining, Oil Red O staining, and Sirius Red staining of liver slides (G),  
880 Hepatic TG (H), serum AST (I), and serum ALT (J) were analyzed in indicated mice. Scale bar is  
881 100 $\mu$ m. Genes related to inflammation (K) and fibrosis (L) were determined by quantitative RT-PCR.  
882 Relative values are normalized to AAV-Control NCD. Values represent means  $\pm$  SEM (n = 5).  
883 \* $P$  < 0.05, \*\* $P$  < 0.01, \*\*\* $P$  < 0.001 vs AAV-Control NCD. # $P$  < 0.05, ## $P$  < 0.01 vs AAV-Control MCD.

884

**Figure 9. E2F1 is upregulated in both NAFLD patients and mice model**

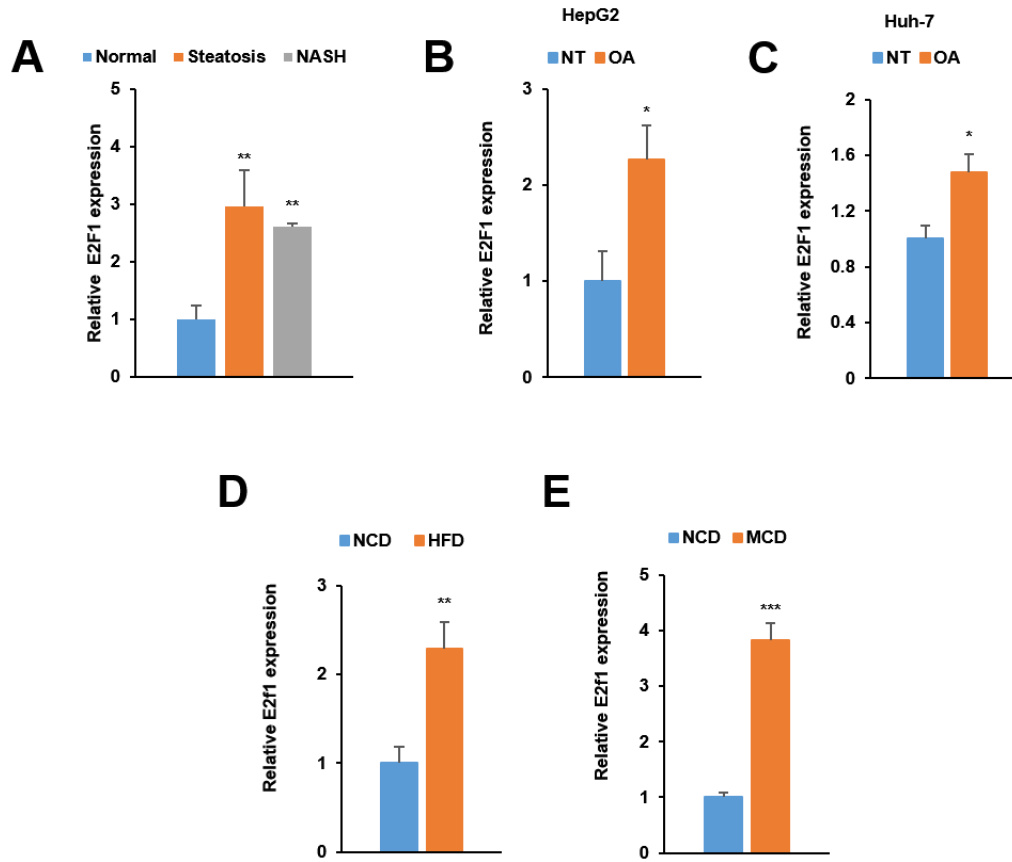

885  
886

887 **Figure 9. E2F1 is upregulated in both NAFLD patients and mice model**

888 The expression of *E2F1* was analyzed by quantitative RT-PCR. Hepatic *E2F1* expression levels of  
889 steatosis or NASH patients were normalized to those of normal patients. \* $P < 0.05$  and \*\* $P < 0.01$  vs  
890 normal patients (A). *E2F1* expression levels from HepG2 cells (B) and Huh-7 cells (C) treated with OA  
891 for 24 h were normalized to no treatment (NT). Hepatic *E2f1* expression levels from C57BL/6J mice  
892 fed a HFD (D) and a MCD (E) were normalized to NCD. Values represent means  $\pm$  SEM (n = 3-5).  
893 \* $P < 0.05$ , \*\* $P < 0.01$ , \*\*\* $P < 0.001$  vs NT in cells or NCD-fed mice, respectively.

894



| <b>Key Resources Table</b>                |                                        |                                                                                                |                                     |                                                    |
|-------------------------------------------|----------------------------------------|------------------------------------------------------------------------------------------------|-------------------------------------|----------------------------------------------------|
| <b>Reagent type (species) or resource</b> | <b>Designation</b>                     | <b>Source or reference</b>                                                                     | <b>Identifiers</b>                  | <b>Additional information</b>                      |
| Genetic reagent ( <i>Mus. Musculus</i> )  | <b>C57BL/6JBomTac</b>                  | DBL                                                                                            |                                     |                                                    |
| cell line ( <i>Homo sapiens</i> )         | HepG2                                  | ATCC                                                                                           | HB-8065                             |                                                    |
| cell line ( <i>Homo sapiens</i> )         | Huh7                                   | Dr. Yoshiharu Matsuura; originally from Japanese Collection of Research Bioresources Cell Bank | JCRB0403<br>,<br>RRID:CV<br>CL_0336 |                                                    |
| Antibody                                  | Anti-PPAR $\alpha$                     | abcam                                                                                          | Cat#<br>ab24509                     | WB 1:1000                                          |
| Antibody                                  | Anti-HSP90                             | Cell Signaling Technology                                                                      | Cat#<br>4877S                       | WB 1:1000                                          |
| Sequence-based reagent                    | miR-20b (miR-20b mimic)                | GenePharma                                                                                     | N/A                                 | Sequence:<br>CAAAGUGC<br>UCAUAGUG<br>CAGGUAG       |
| Sequence-based reagent                    | anti-miR-20b (miR-20b inhibitor)       | GenePharma                                                                                     | N/A                                 | Sequence:<br>CUACCUGC<br>ACUAUGAG<br>CACUUUG       |
| Sequence-based reagent                    | PPAR $\alpha$ siRNA                    | GenePharma                                                                                     | N/A                                 | Sequence:<br>CGGCGAGG<br>ATAGTTCT<br>GGAAGCTT<br>T |
| Sequence-based reagent                    | Primers for qPCR                       | This paper                                                                                     | N/A                                 | See Materials and Methods                          |
| Recombinant DNA reagent                   | psiCHECK-2-PPAR $\alpha$ -WT (plasmid) | This paper                                                                                     | N/A                                 |                                                    |

|                         |                                              |                          |                |                                                                                                           |
|-------------------------|----------------------------------------------|--------------------------|----------------|-----------------------------------------------------------------------------------------------------------|
| Recombinant DNA reagent | psiCHECK-2-PPAR $\alpha$ -Mut (plasmid)      | This paper               | N/A            |                                                                                                           |
| Recombinant DNA reagent | pOTTC385-pAAV CMV-IE IRES EGFP-miR-20b       | This paper               | N/A            |                                                                                                           |
| Recombinant DNA reagent | pOTTC385-pAAV CMV-IE IRES EGFP-anti-miR-20b  | This paper               | N/A            |                                                                                                           |
| commercial assay or kit | Dual-Luciferase kit                          | Promega                  | Cat# E1910     |                                                                                                           |
| commercial assay or kit | RNeasy mini kit                              | Qiagen                   | Cat# 74004     |                                                                                                           |
| commercial assay or kit | QuickChange II Site-Directed Mutagenesis Kit | Agilent                  | Cat# 200521    |                                                                                                           |
| commercial assay or kit | AAVpro <sup>®</sup> Purification Kit         | Takara Bio.              | Cat# 6675      |                                                                                                           |
| commercial assay or kit | B-hydroxybutyrate assay Kit                  | abcam                    | Cat# ab83390   |                                                                                                           |
| Chemical Compound, drug | Oleic acid                                   | Sigma-Aldrich            | Cat# O1008     |                                                                                                           |
| Chemical Compound, drug | Fenofibrate                                  | Santa Cruz biotechnology | Cat# sc-204751 | - HepG2 cells were treated with fenofibrate (100 $\mu$ M)<br>- mice injected with fenofibrate (100 mg/kg) |

895

**Figure 1. miR-20b significantly increases in the livers of dietary obese mice and human.**

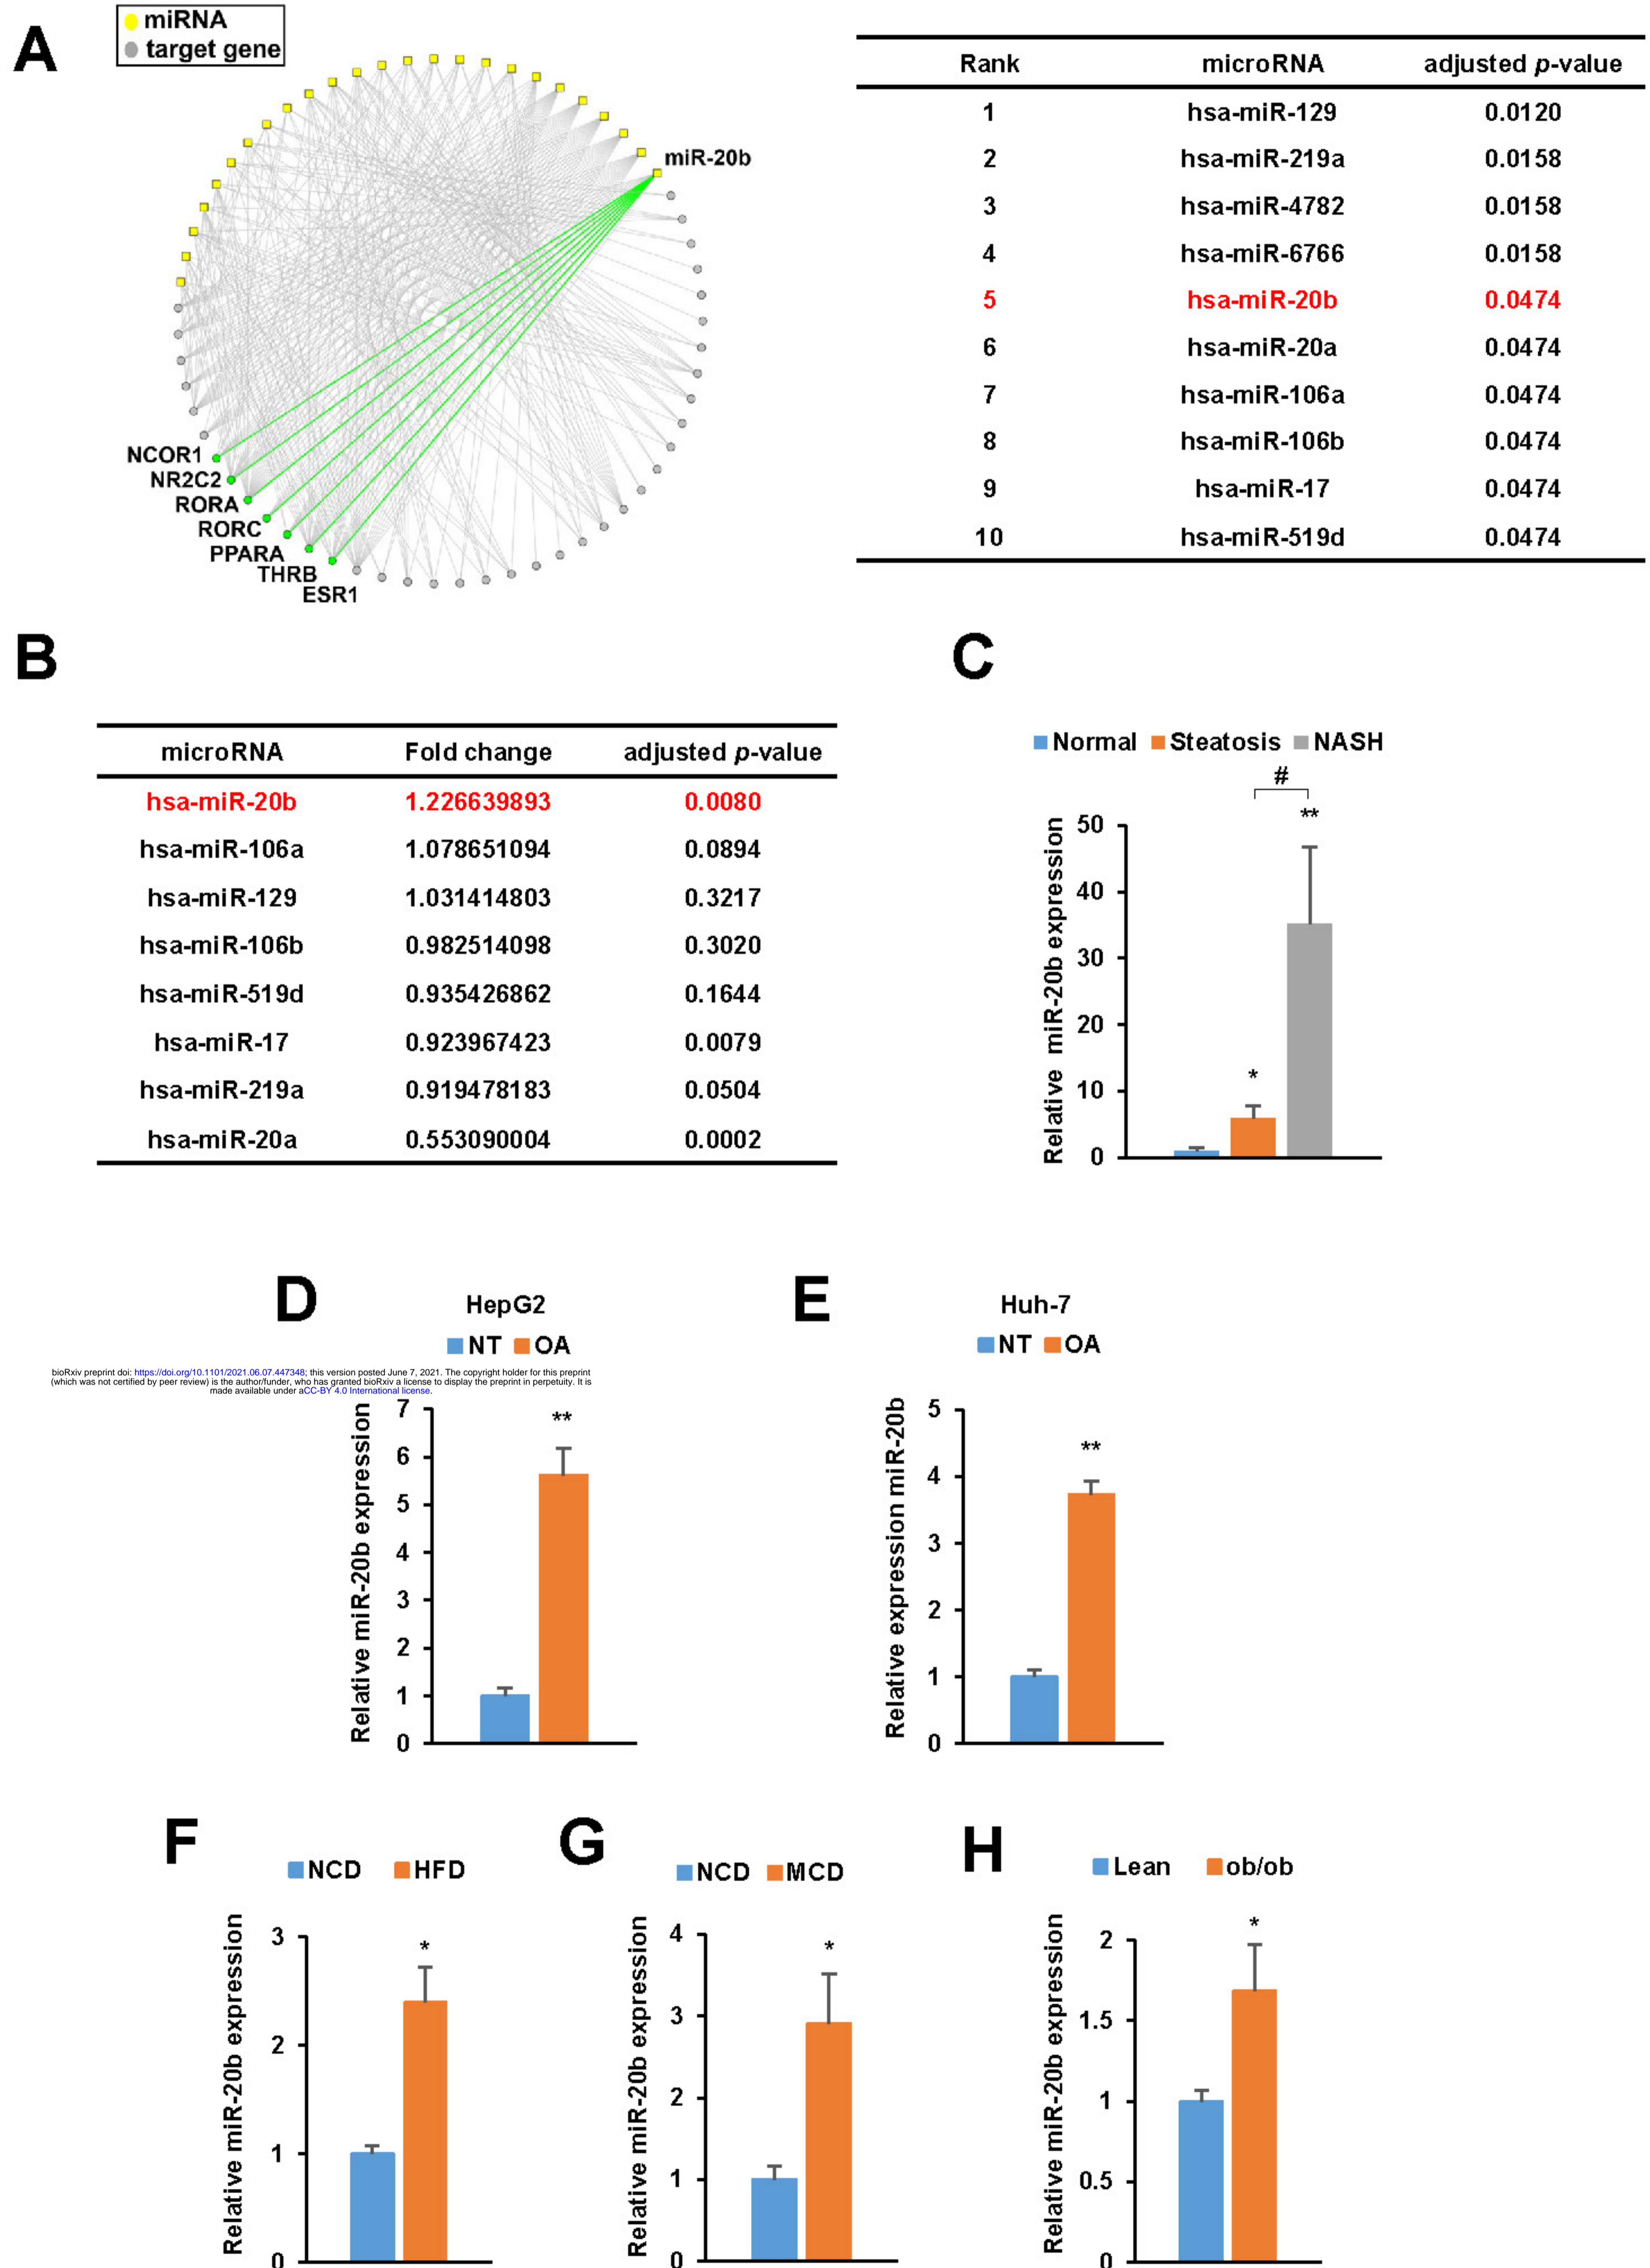



Figure 1-figure supplement 1. Clinical characteristics of patients with control individuals (N=5), steatosis (steatosis > 50%, N=4) and NASH patients (N=4).

| Patients                  | Normal |       |       |       |      | Steatosis |       |       |       | NASH |       |      |       |
|---------------------------|--------|-------|-------|-------|------|-----------|-------|-------|-------|------|-------|------|-------|
|                           |        |       |       |       |      |           |       |       |       |      |       |      |       |
| Age (years)               | 54     | 45    | 41    | 59    | 58   | 58        | 72    | 54    | 70    | 61   | 67    | 71   | 68    |
| Gender                    | F      | M     | F     | M     | M    | M         | M     | F     | M     | M    | M     | M    | F     |
| Weight (kg)               | 60.5   | 67    | 66.15 | 73.75 | 51.1 | 59.1      | 70.1  | 54.91 | 62.5  | 73.5 | 58.7  | 58.7 | 65.16 |
| BMI                       | 26.39  | 22.65 | 24.33 | 27.22 | 18.2 | 23.92     | 25.29 | 21.97 | 22.98 | 24.7 | 21.02 | 23.5 | 27.34 |
| AST (IU/L)                | 26     | 13    | 26    | 28    | 18   | 20        | 23    | 28    | 20    | 31   | 58    | 20   | 64    |
| ALT (IU/L)                | 30     | 38    | 20    | 28    | 20   | 33        | 23    | 9     | 16    | 35   | 32    | 21   | 31    |
| GGT (IU/L)                | 30     | N/A   | 33    | 31    | 26   | 26        | 34    | 11    | 38    | 110  | 136   | 37   | 158   |
| ALP (IU/L)                | 47     | 60    | 73    | 74    | 93   | 62        | 70    | 63    | 68    | 99   | 77    | 63   | 88    |
| Billirubin (mg/dL)        | 0.9    | 0.9   | 1.1   | 1.1   | 0.7  | 0.6       | 1     | 0.7   | 0.4   | 0.7  | 0.5   | 0.5  | 0.9   |
| INR                       | 0.97   | 1.06  | 1     | 1.03  | 0.97 | 1         | 0.93  | 1.07  | 1     | 1.01 | 0.97  | 1.09 | 1     |
| Total Cholesterol (mg/dL) | 203    | 88    | 179   | 162   | 178  | 171       | 115   | 169   | 148   | 238  | 161   | 260  | 258   |



**Figure 2. PPAR $\alpha$  is a direct target of miR-20b.**

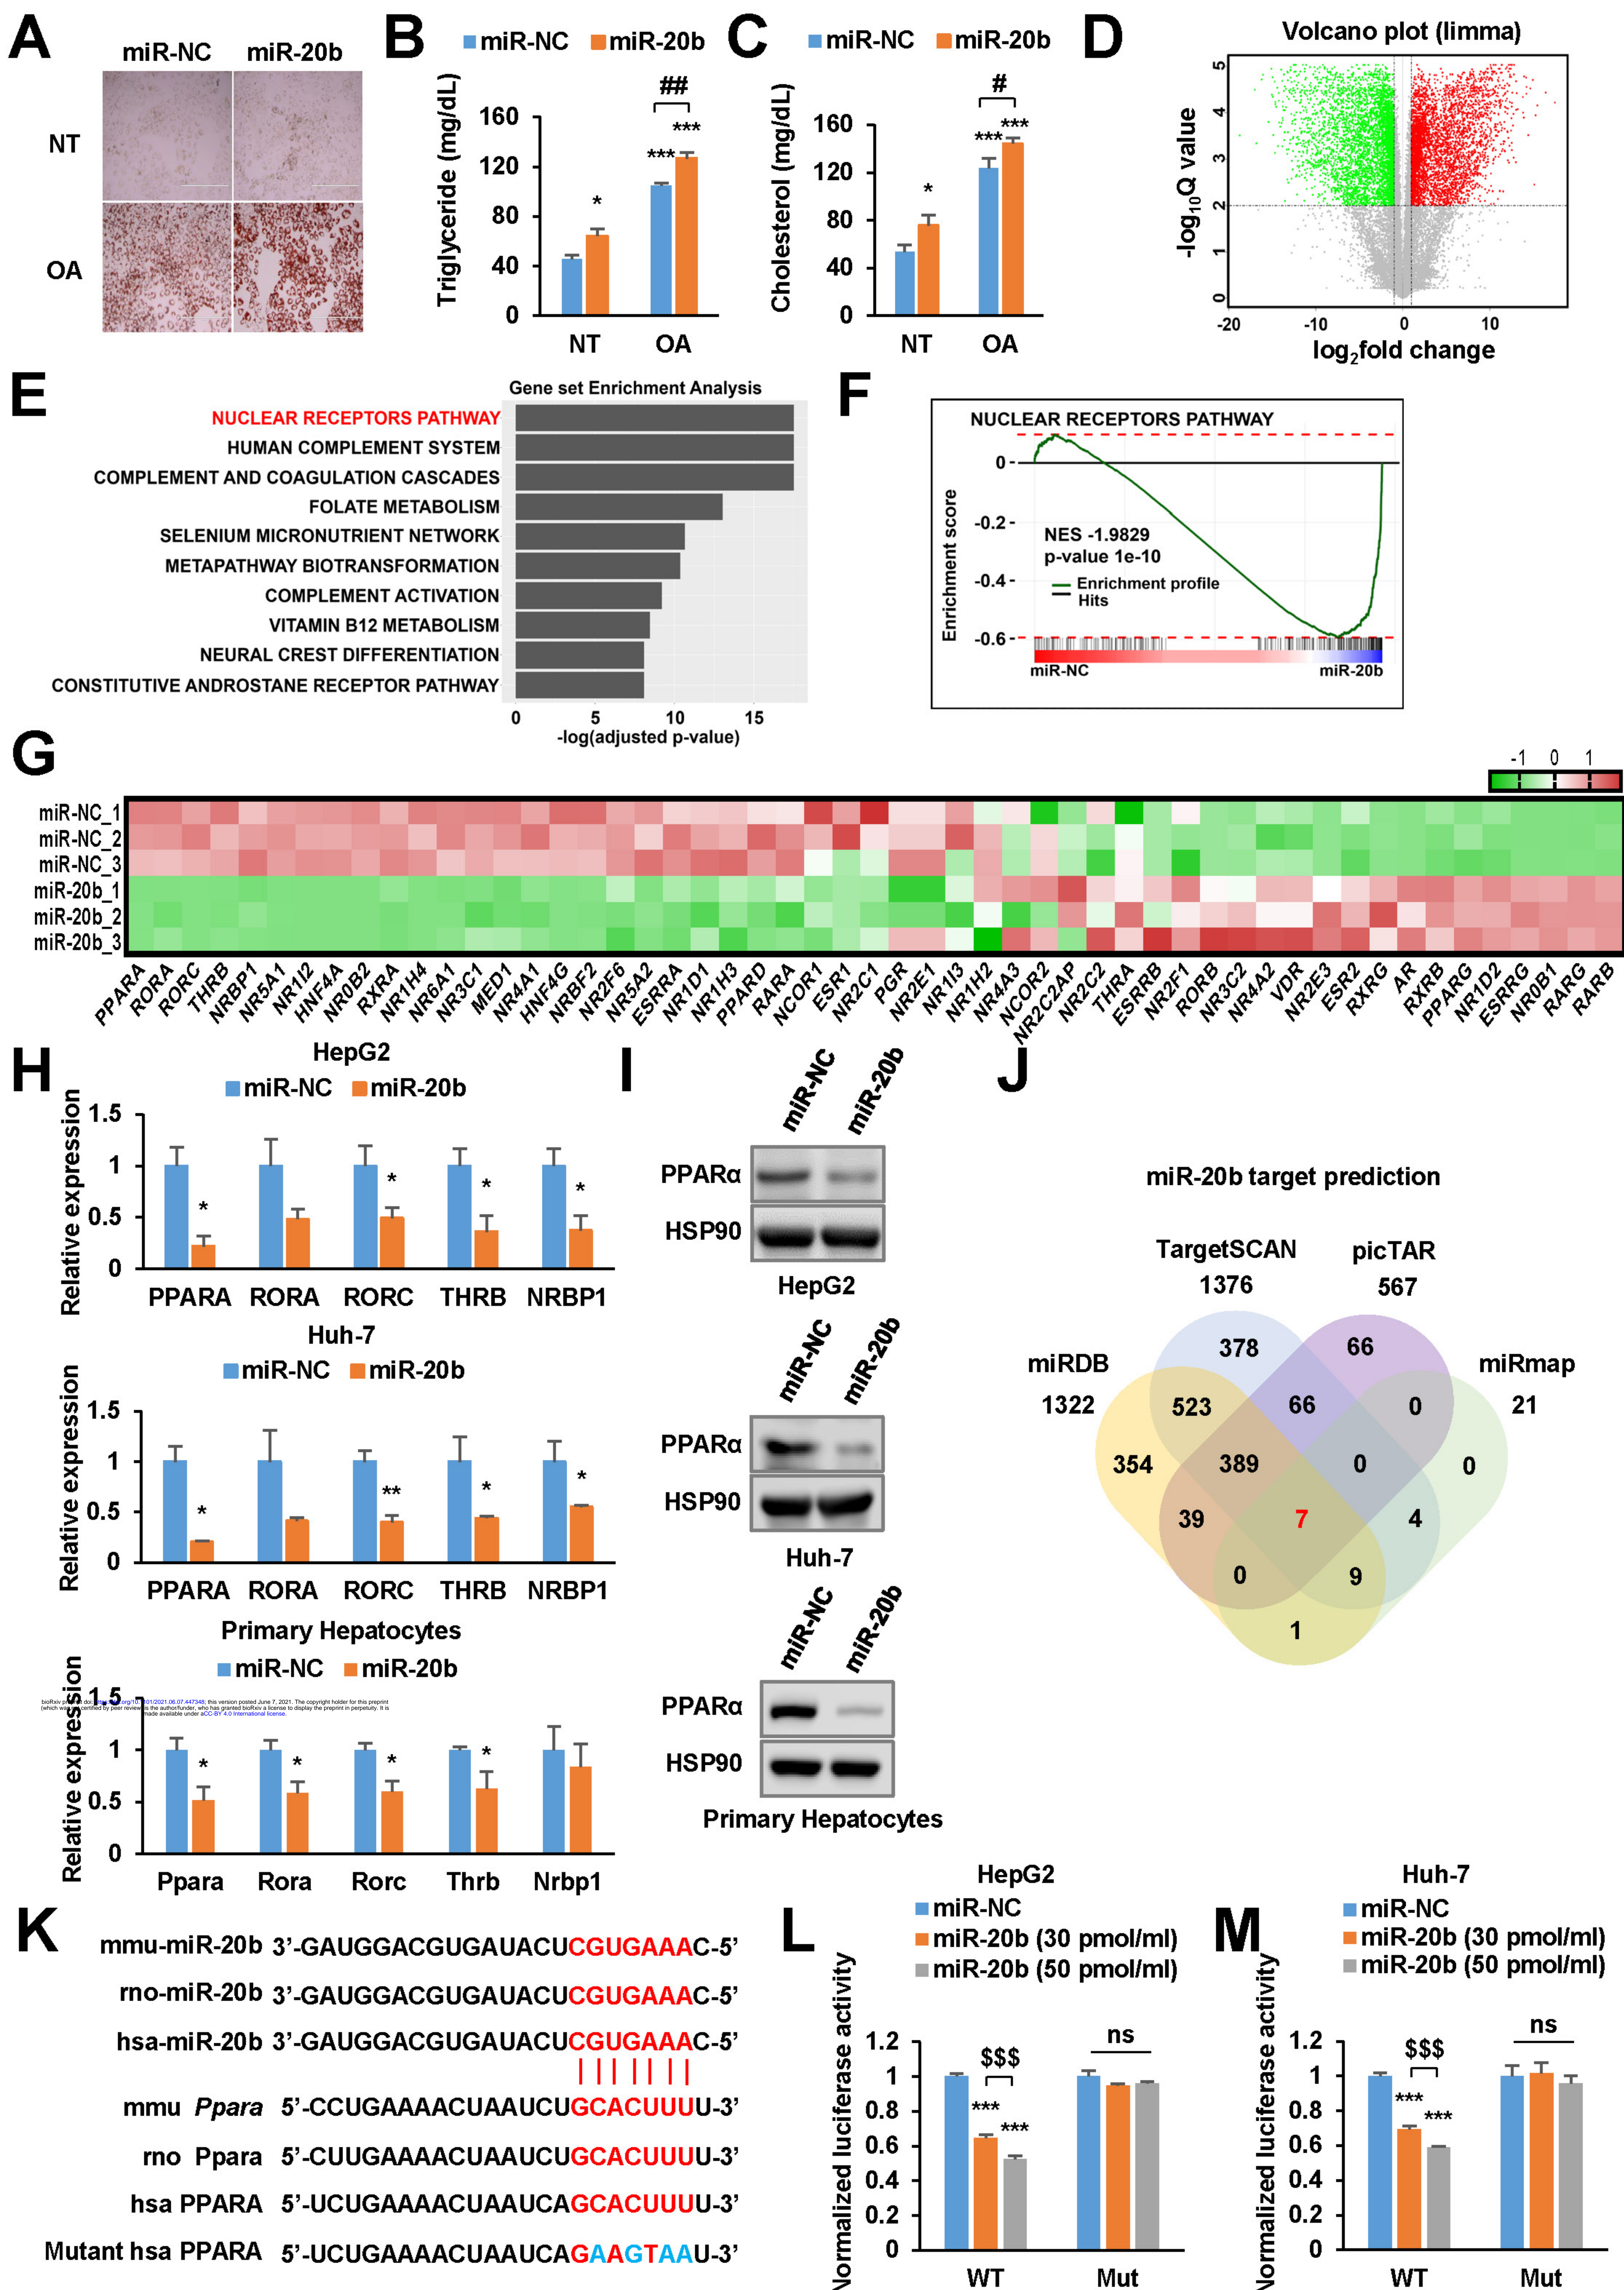



Figure 2-figure supplement 1. Analysis of PPAR $\alpha$  related pathway in RNA-seq of miR-20b overexpressed HepG2 cells.

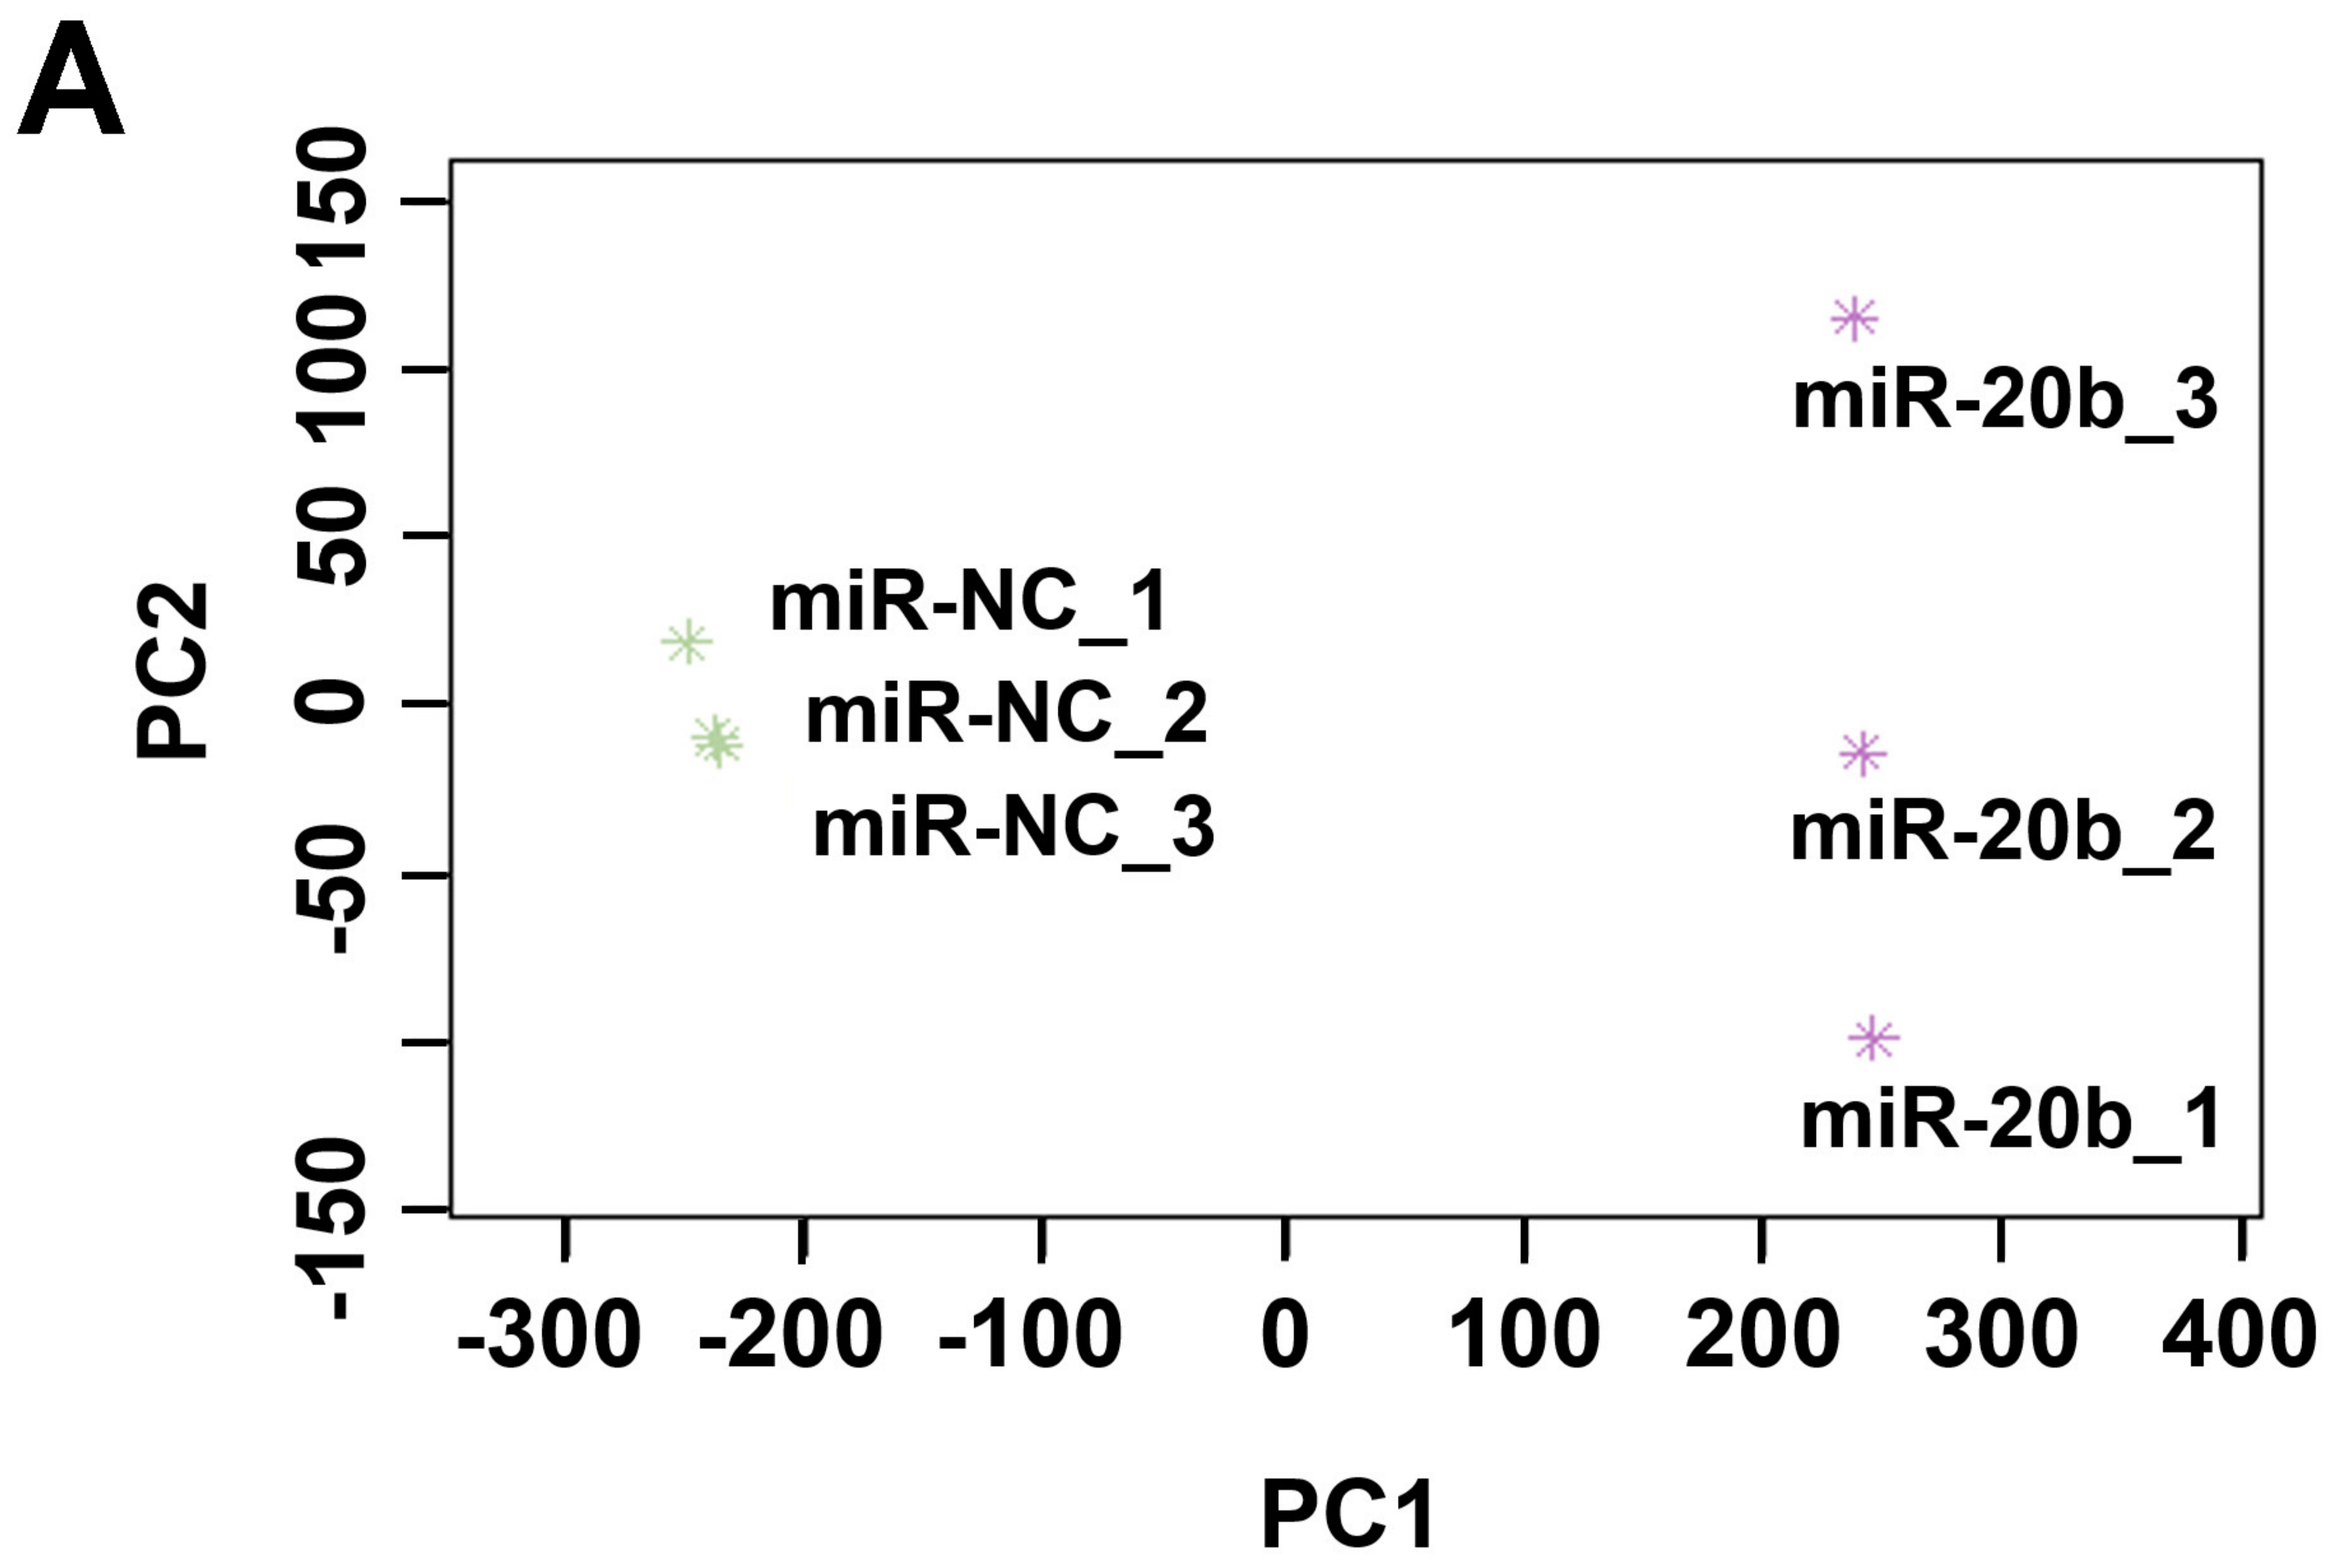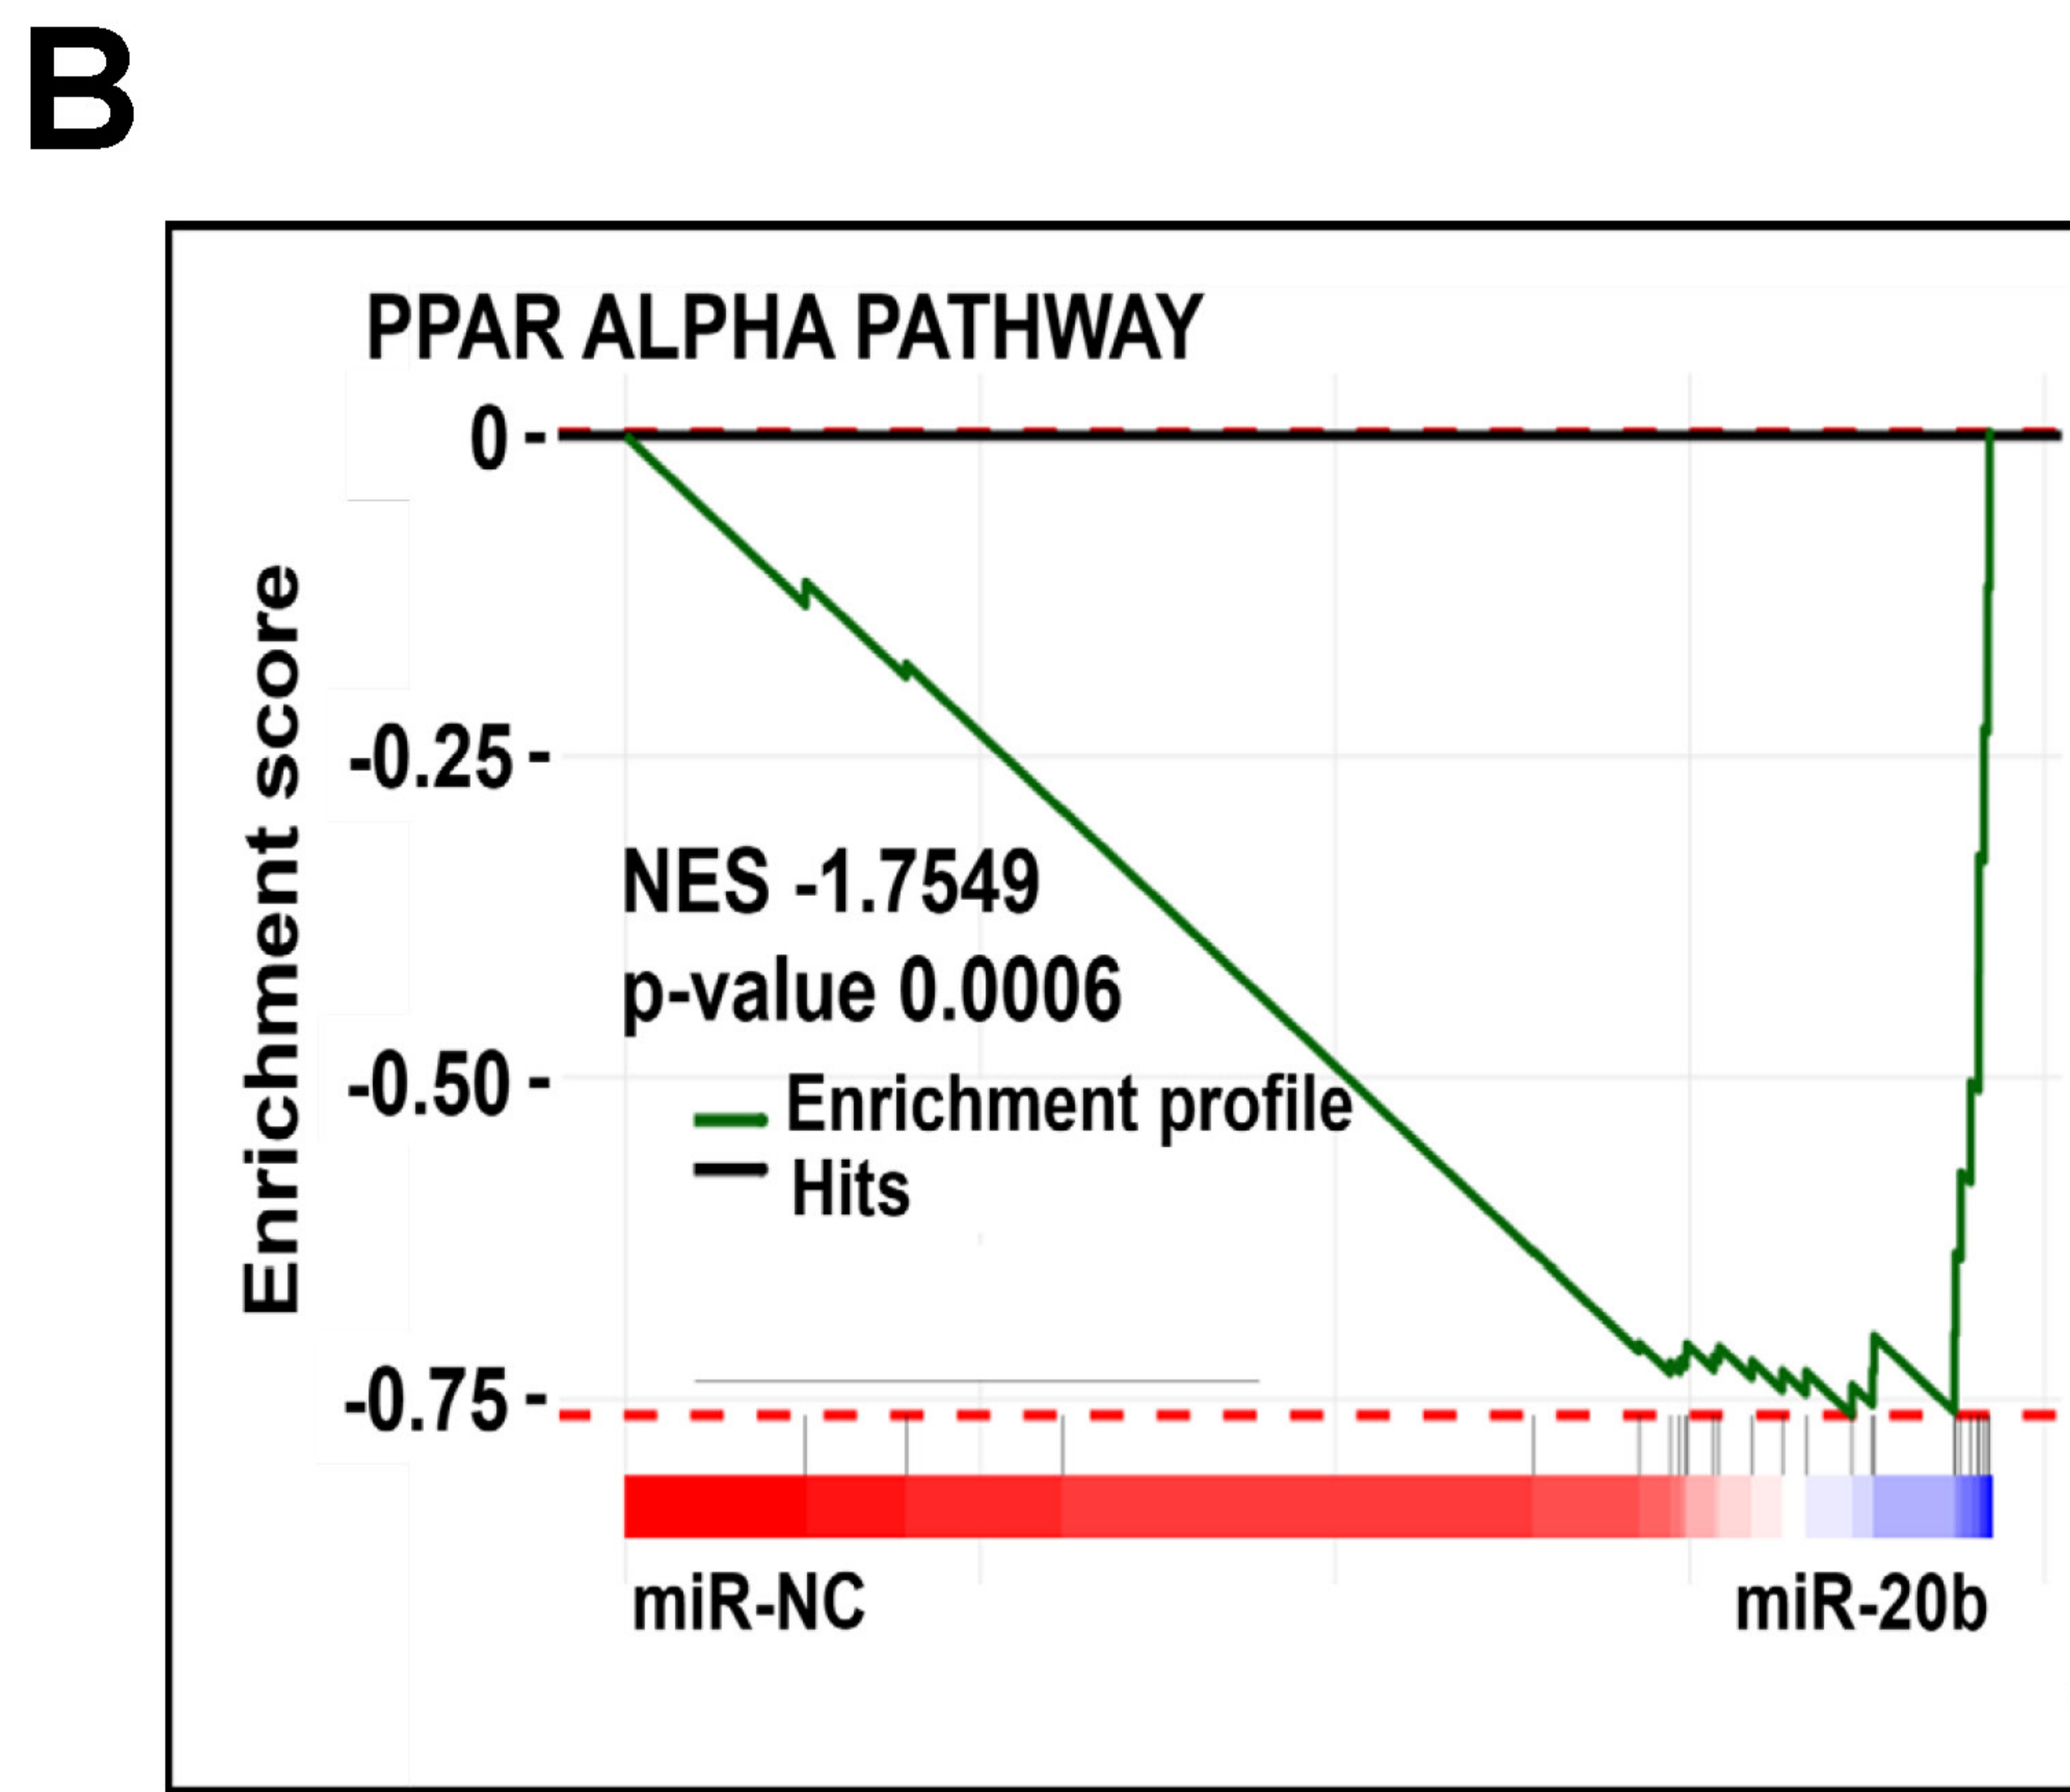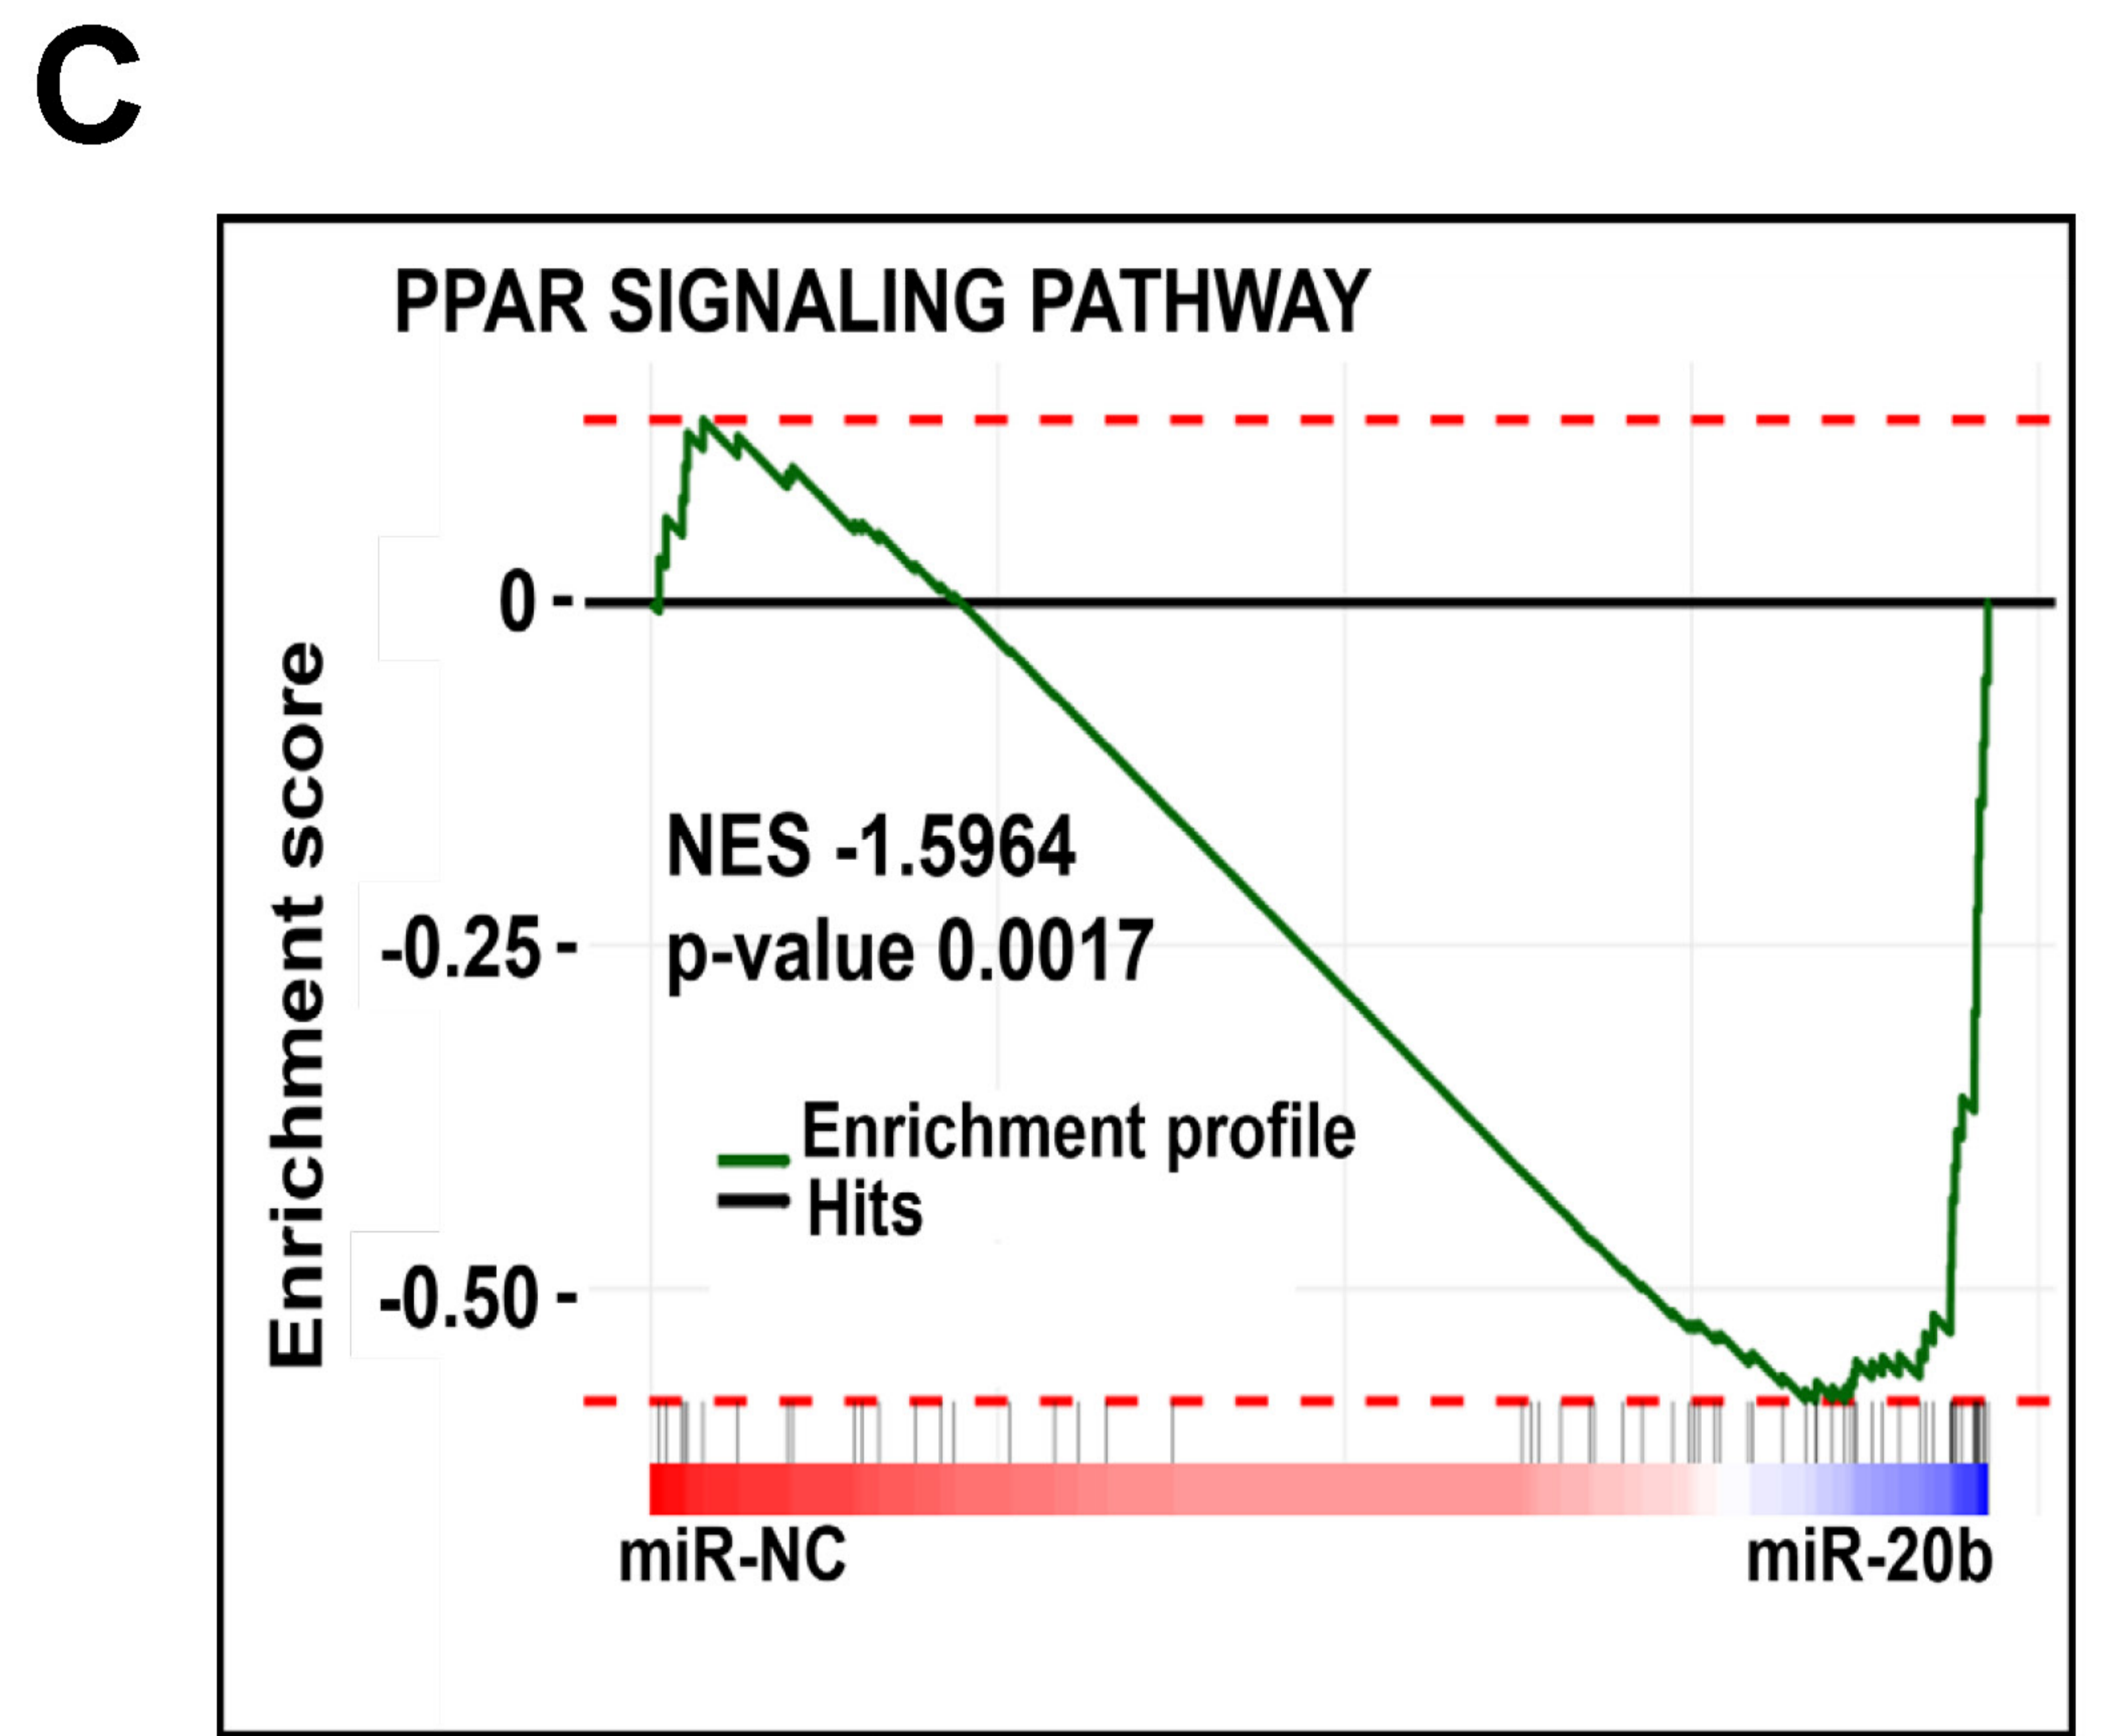



Figure 2-figure supplement 2. PPAR $\alpha$  is the primary target of the overlapped candidates.

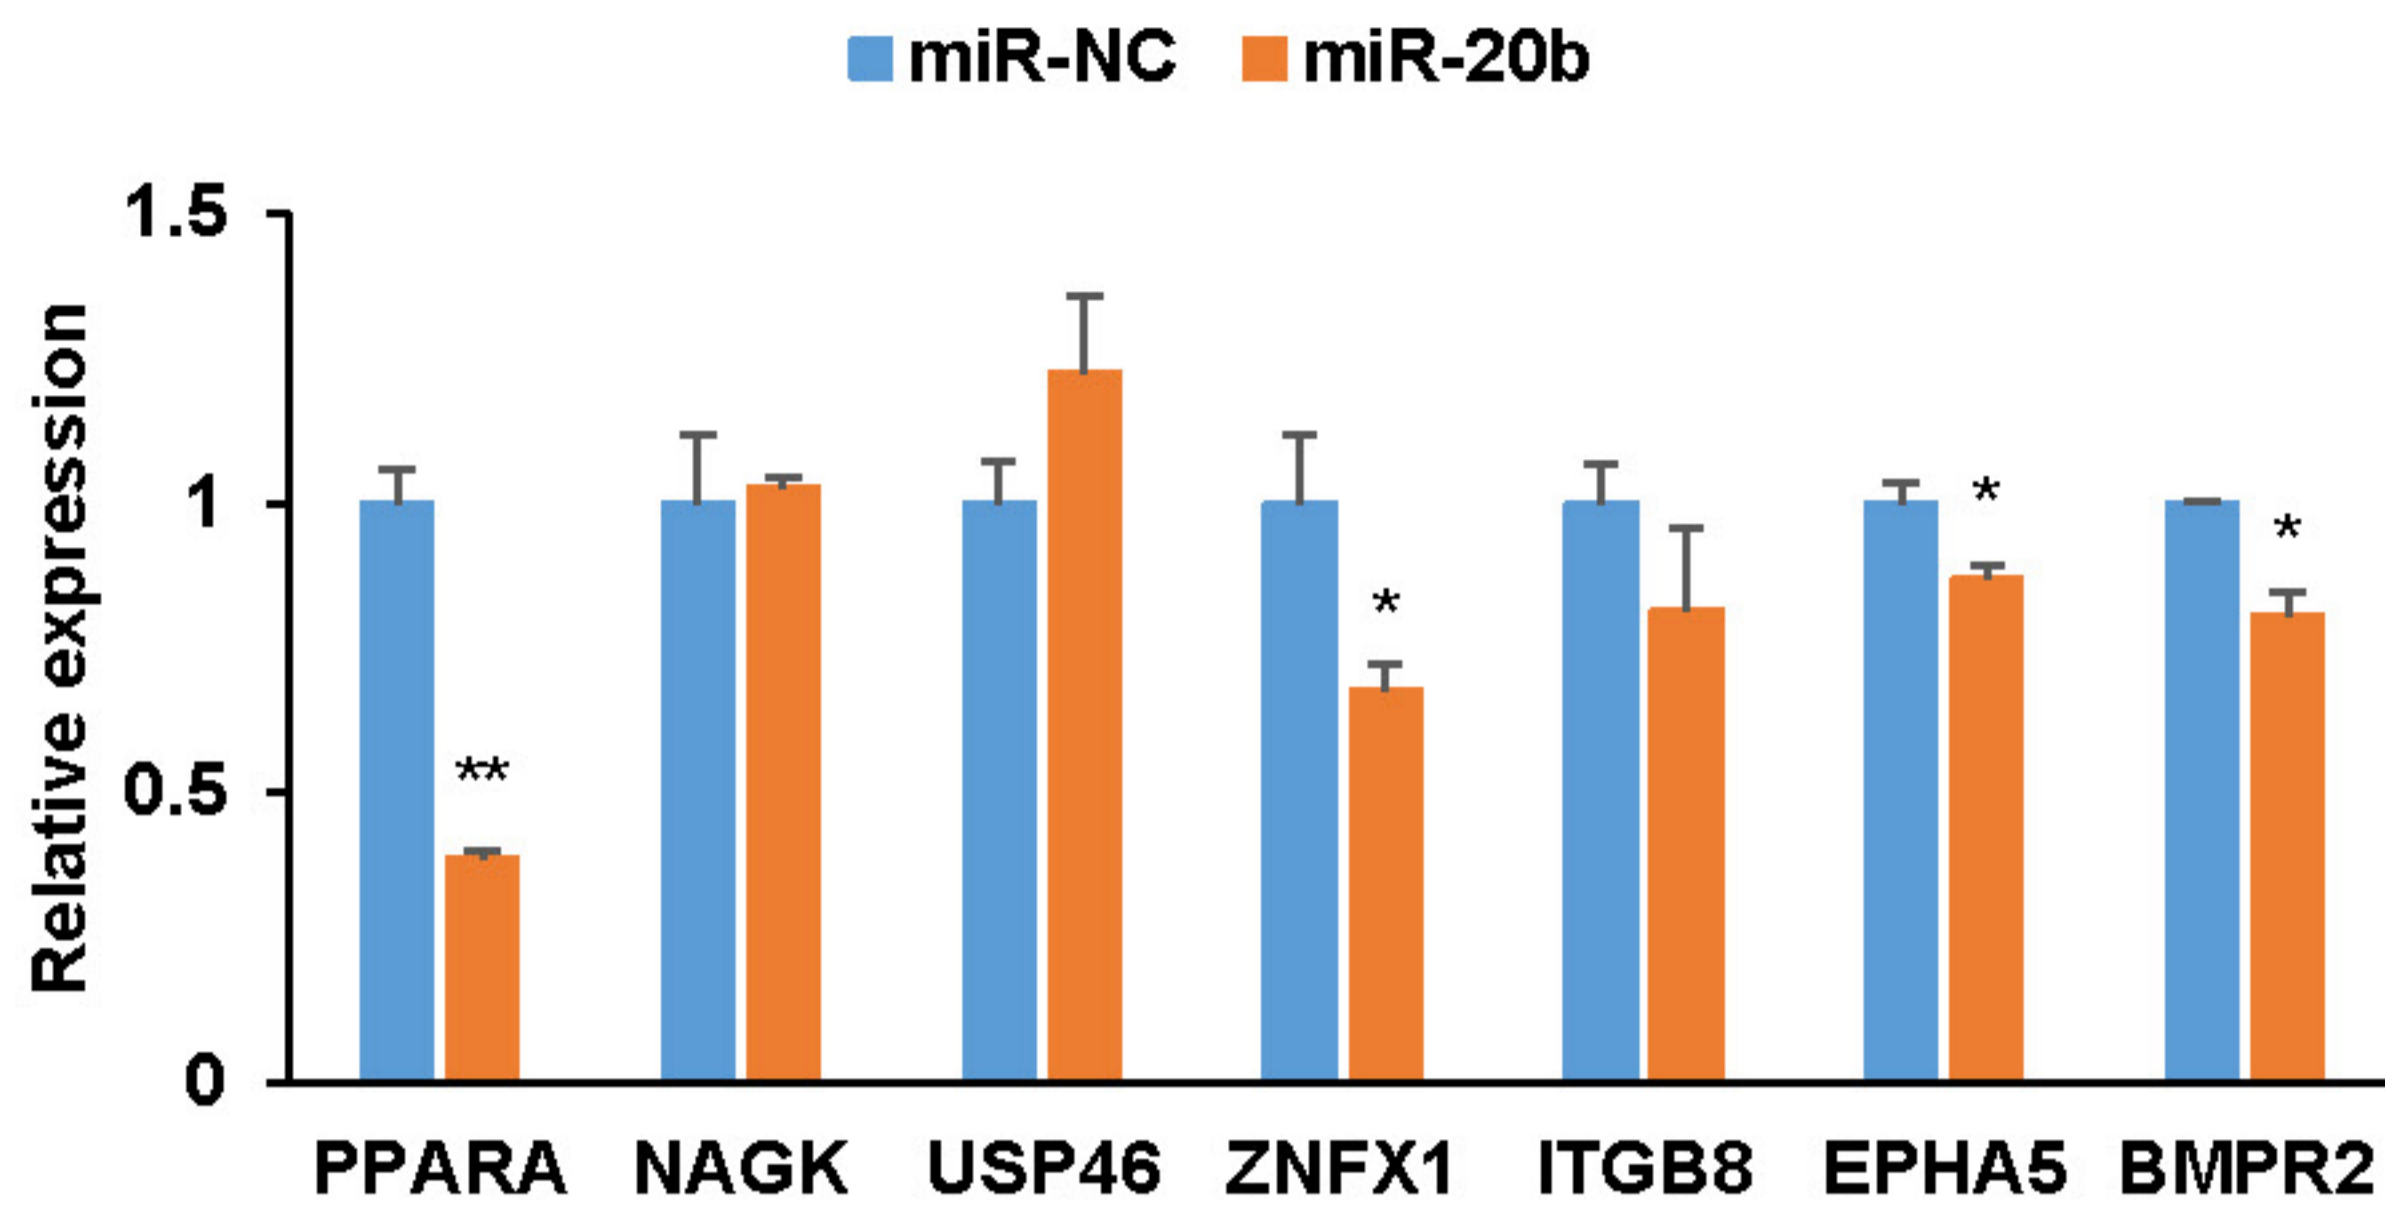

Figure 3. miR-20b regulates fatty acid metabolism.

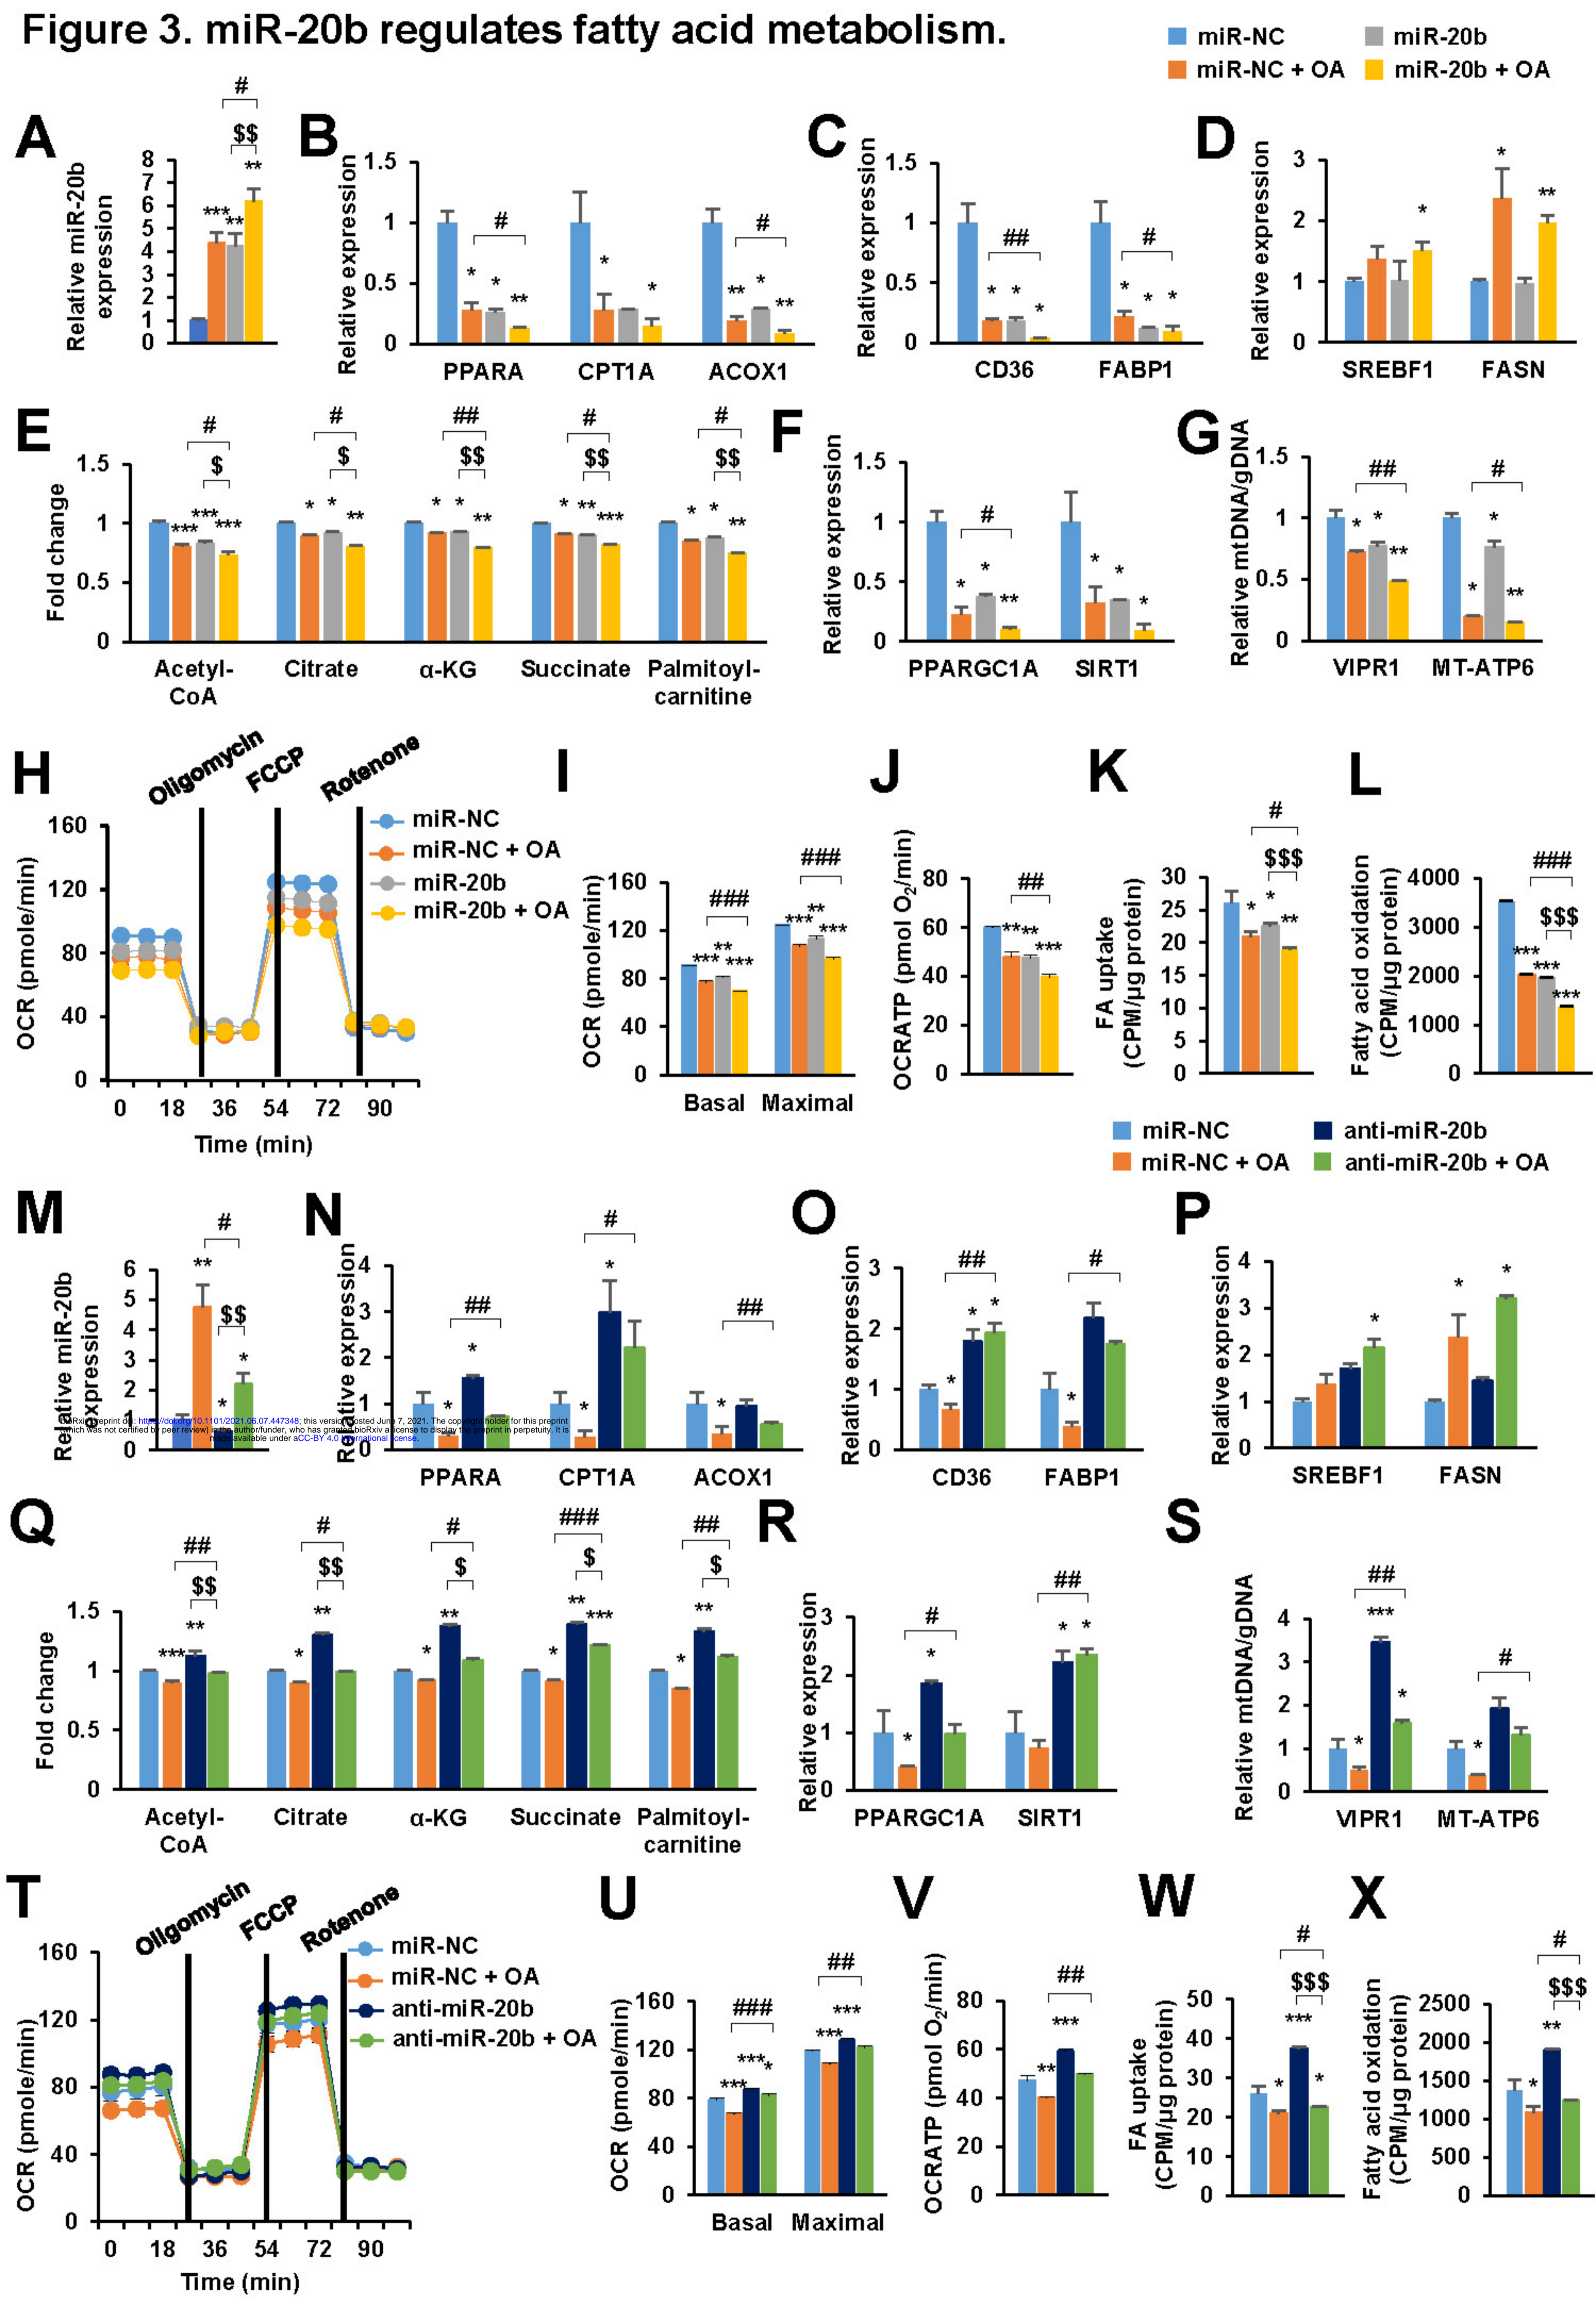



Figure 3-figure supplement 1. The expression of PPAR $\alpha$  is regulated both in human and mice.

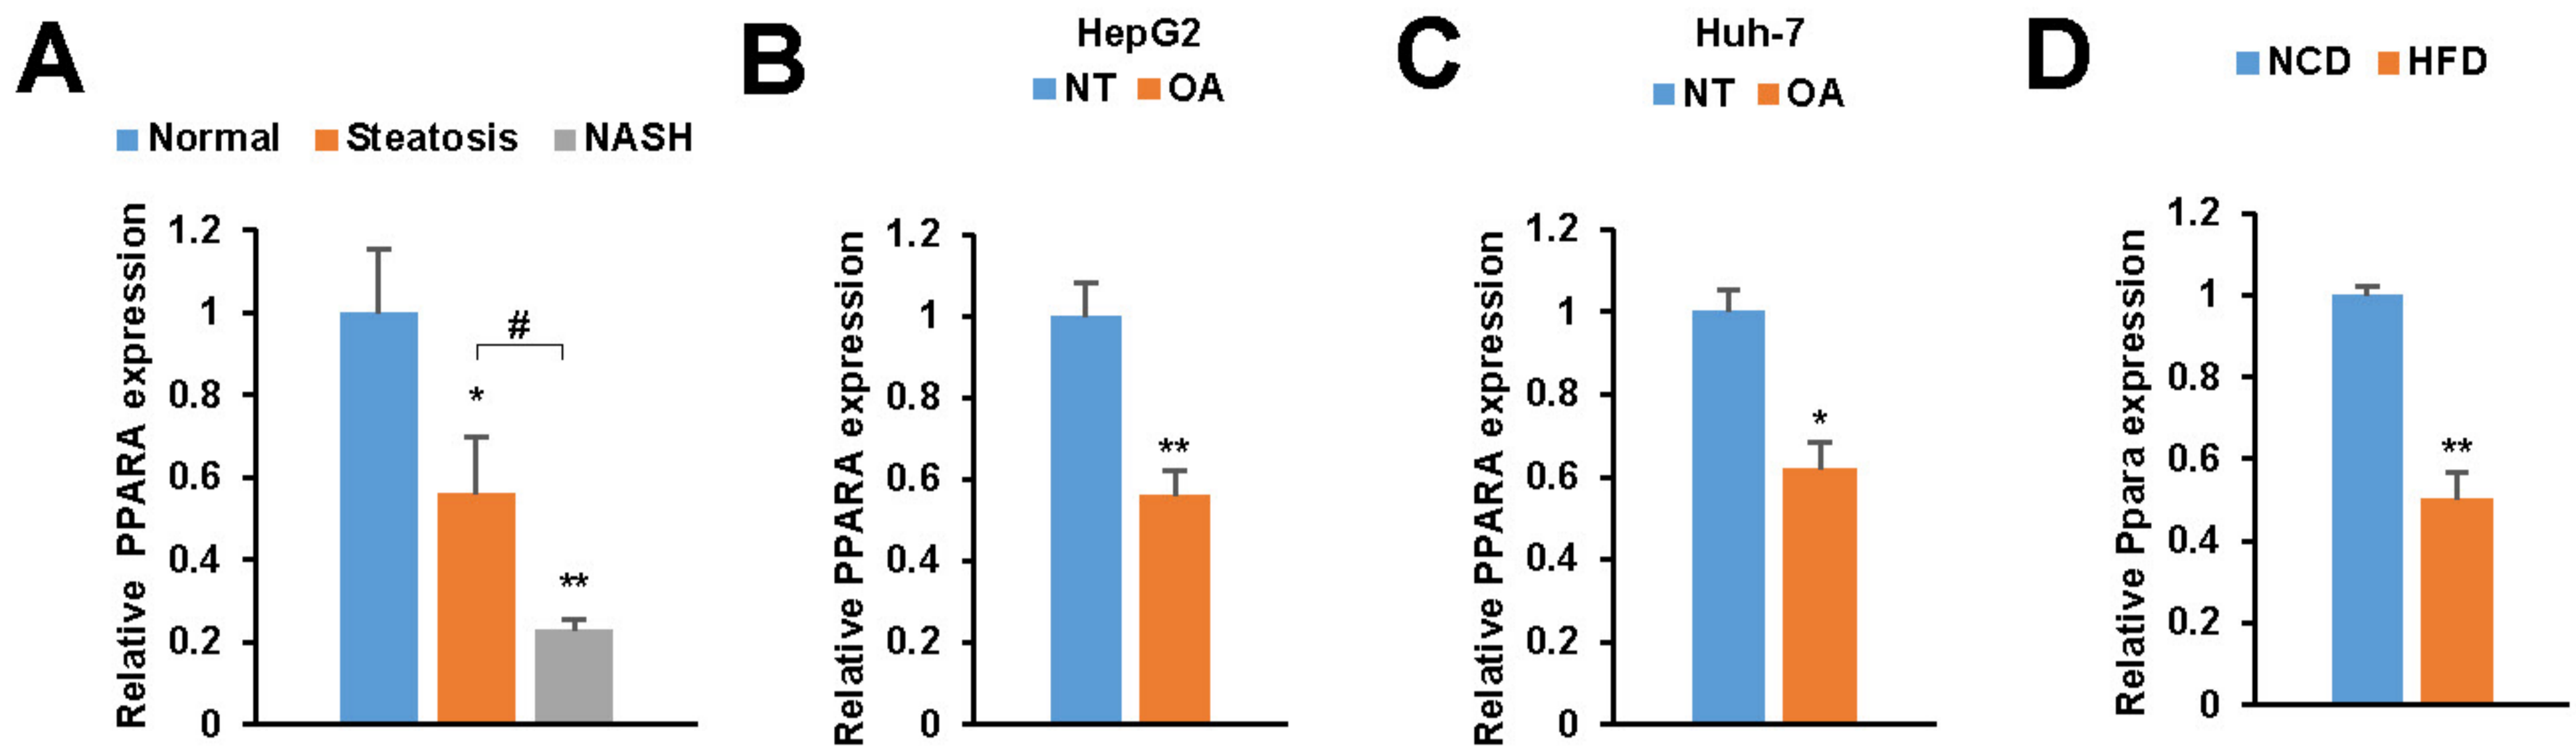

# Figure 3-figure supplement 2. miR-20b induces hepatic steatosis in primary hepatocytes

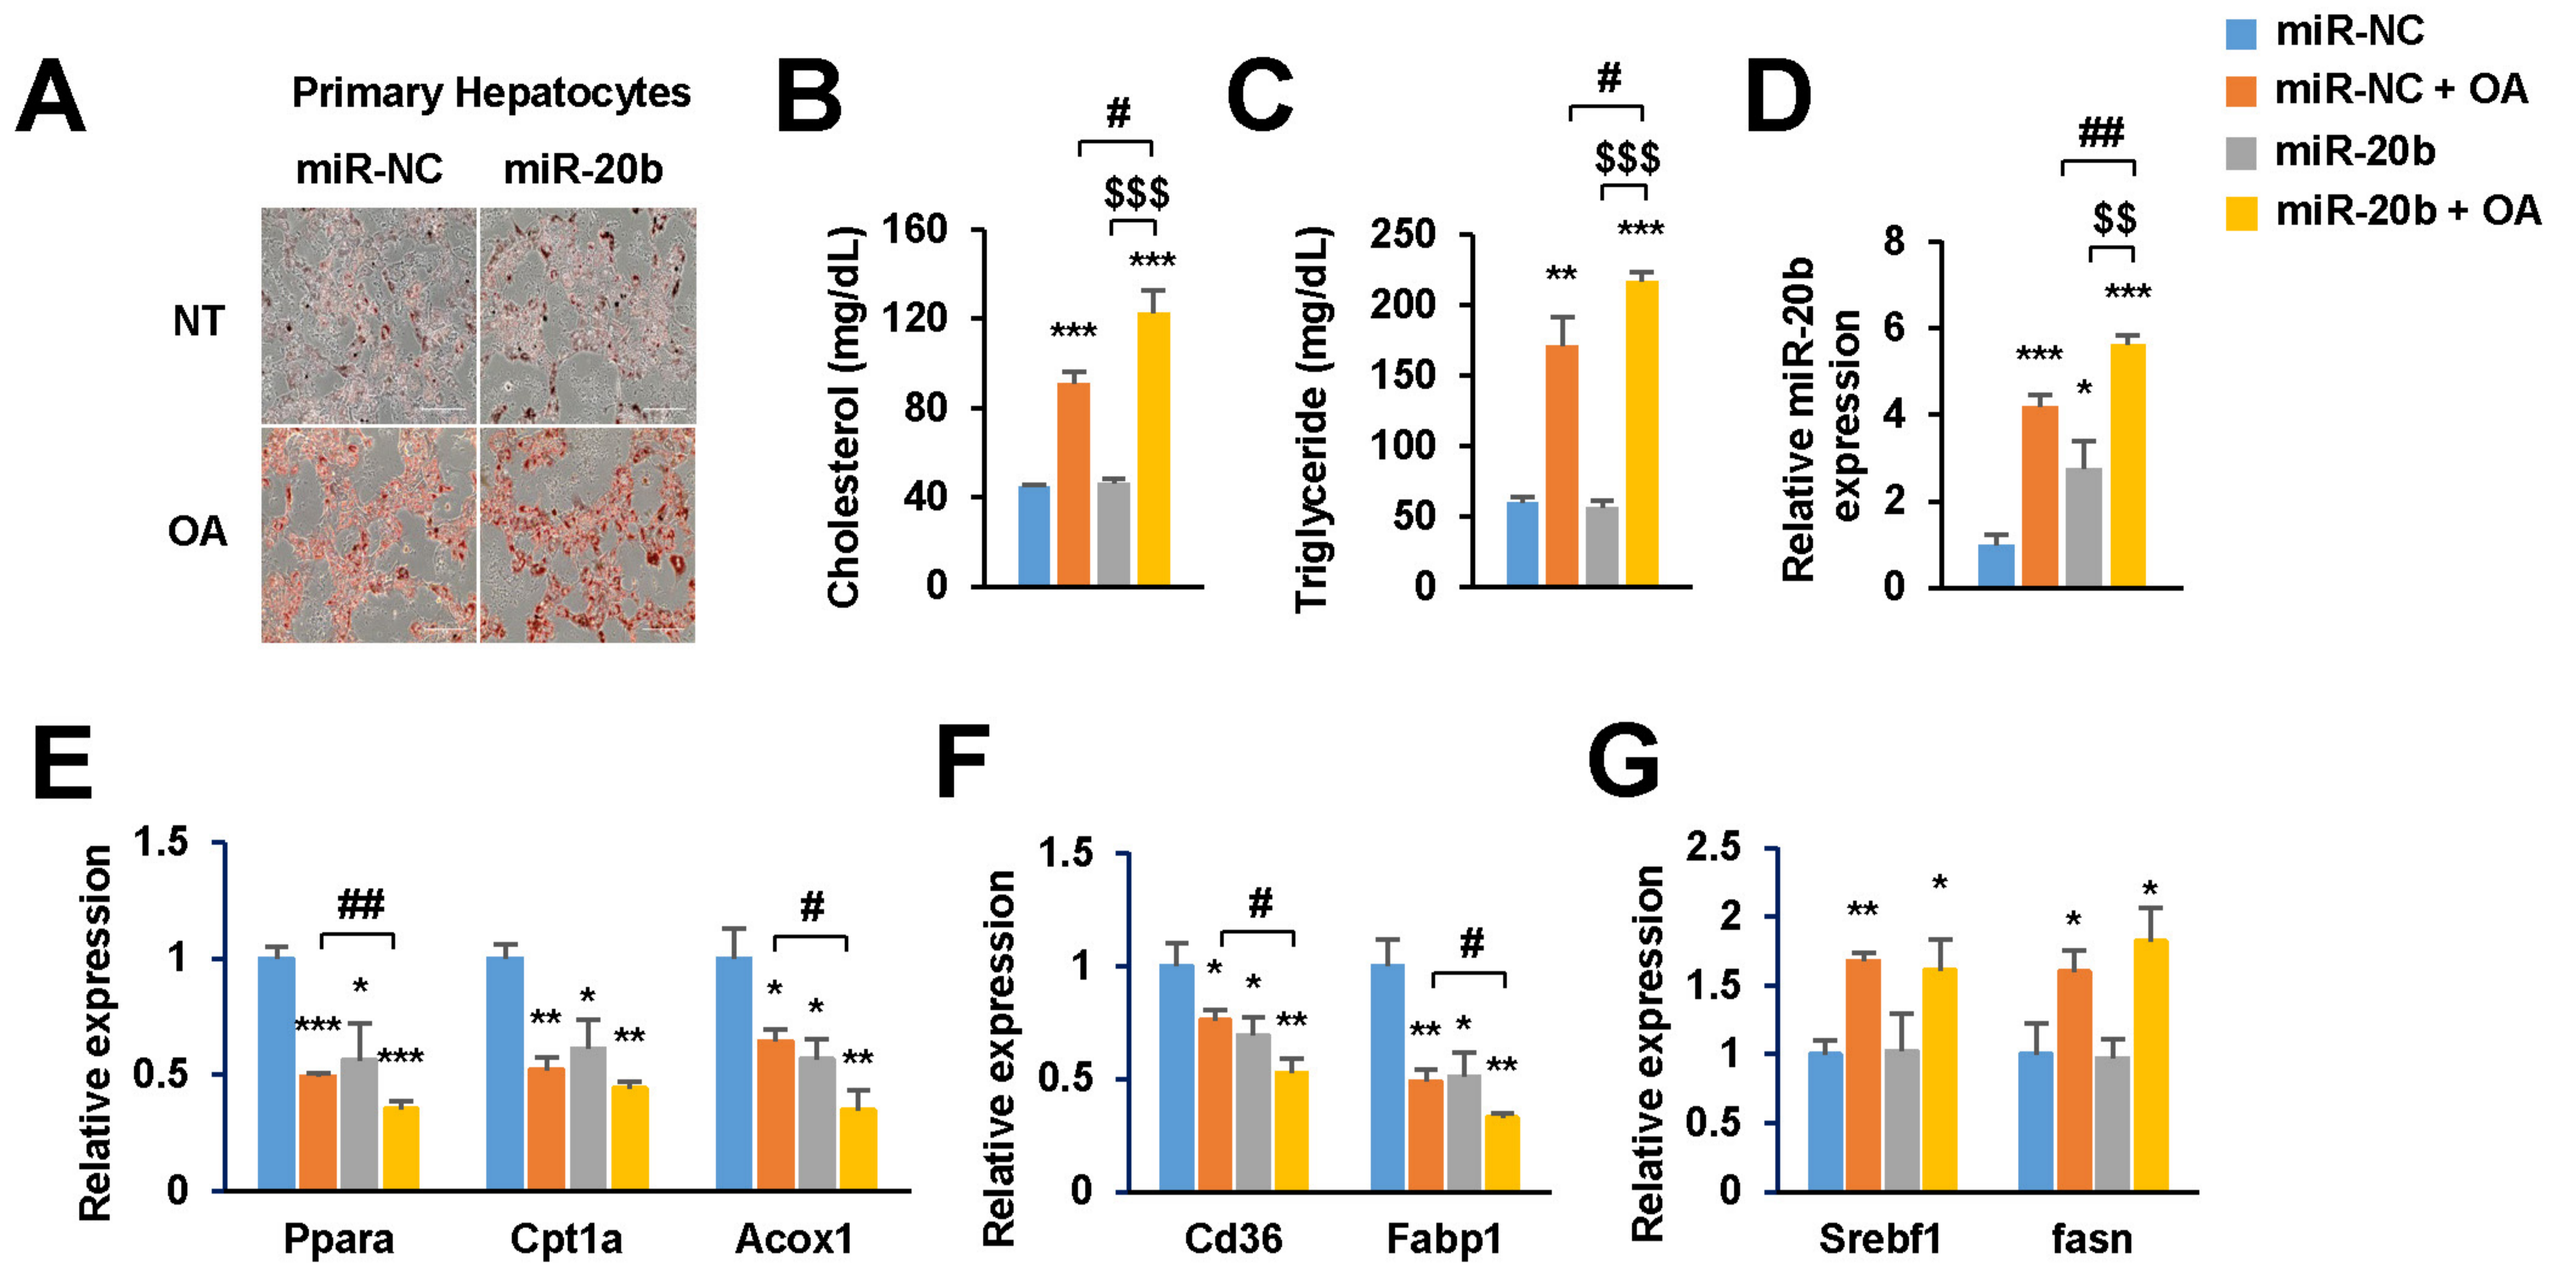



# Figure 3-figure supplement 3. Ketogenesis is not regulated by miR-20b in HepG2 cells.

## A

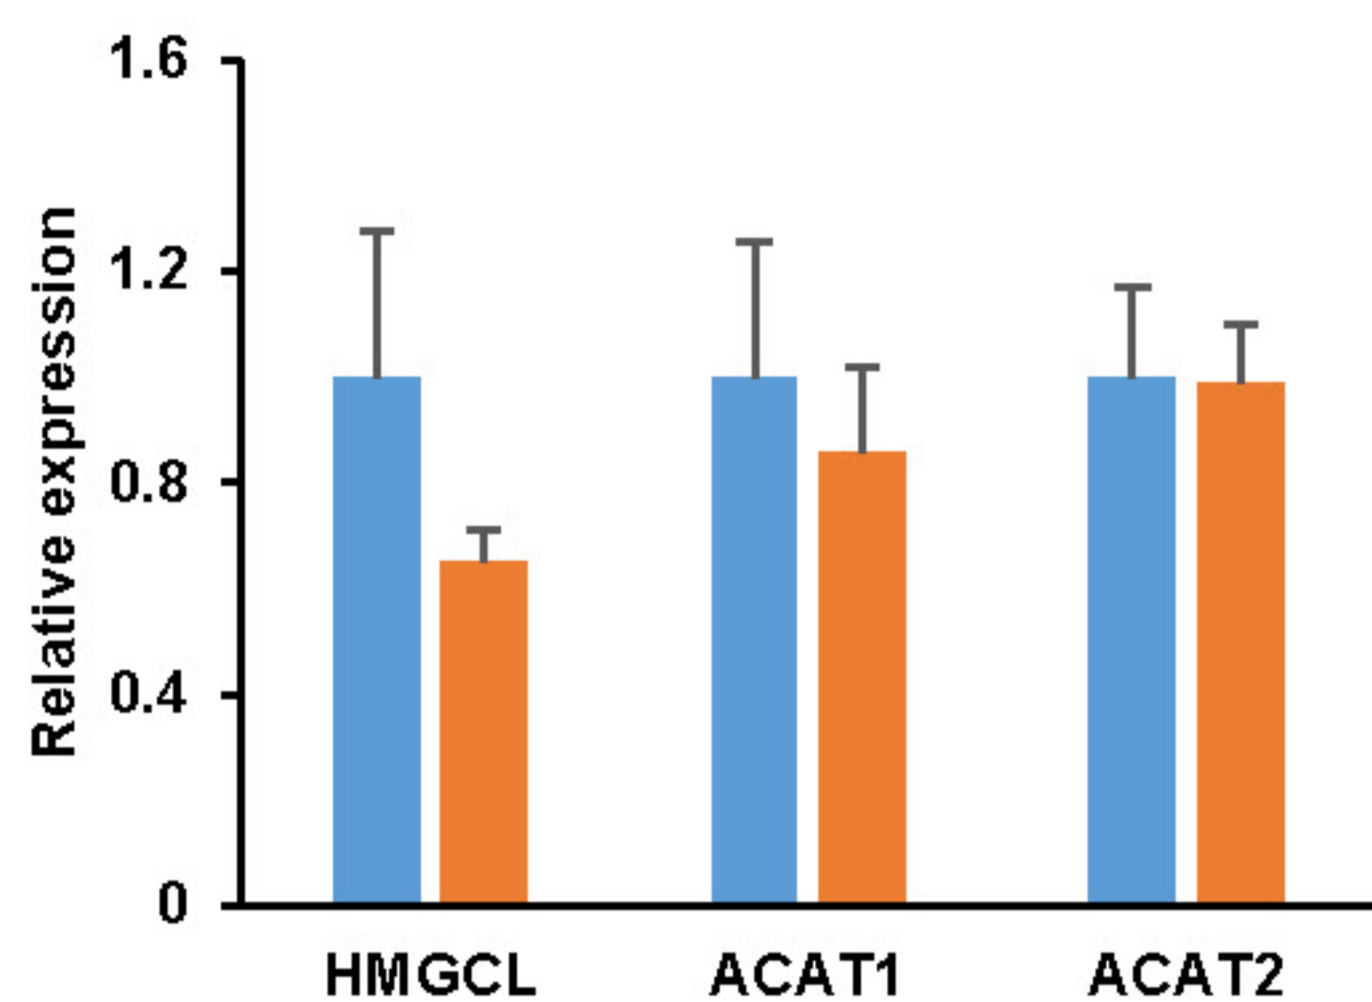

## B

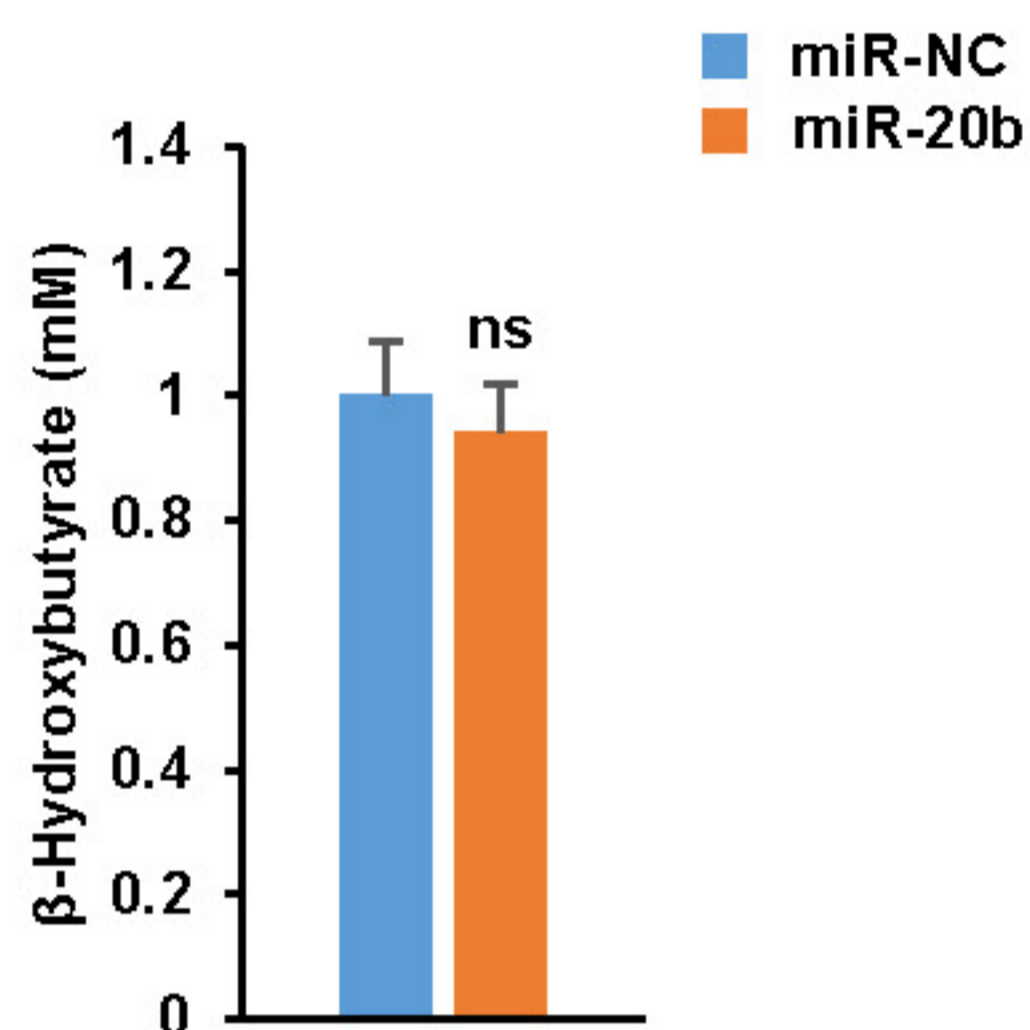

## C

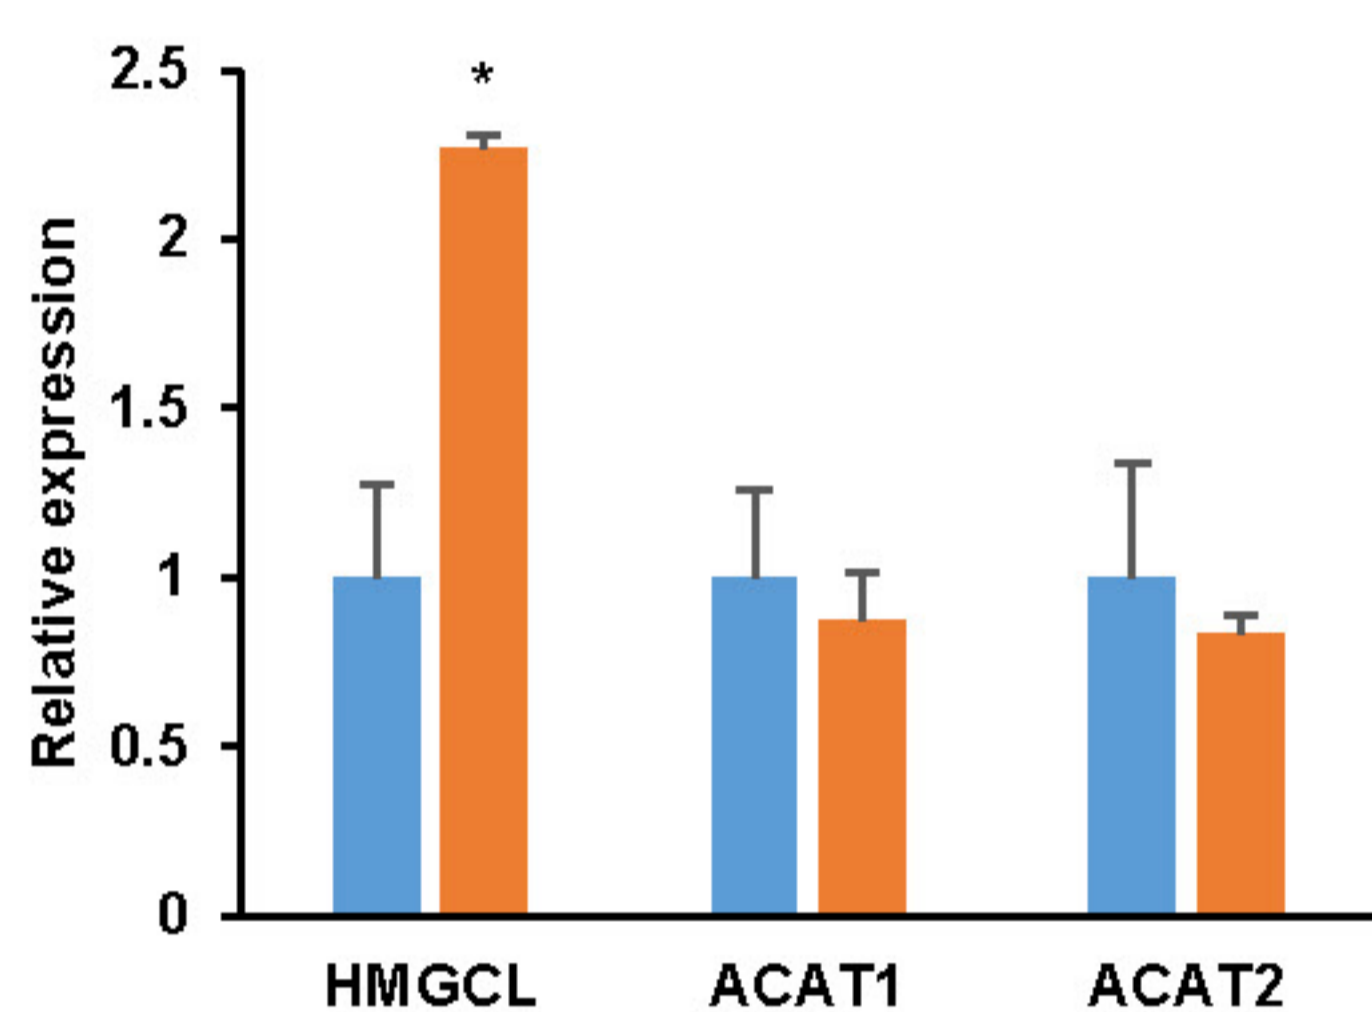

## D

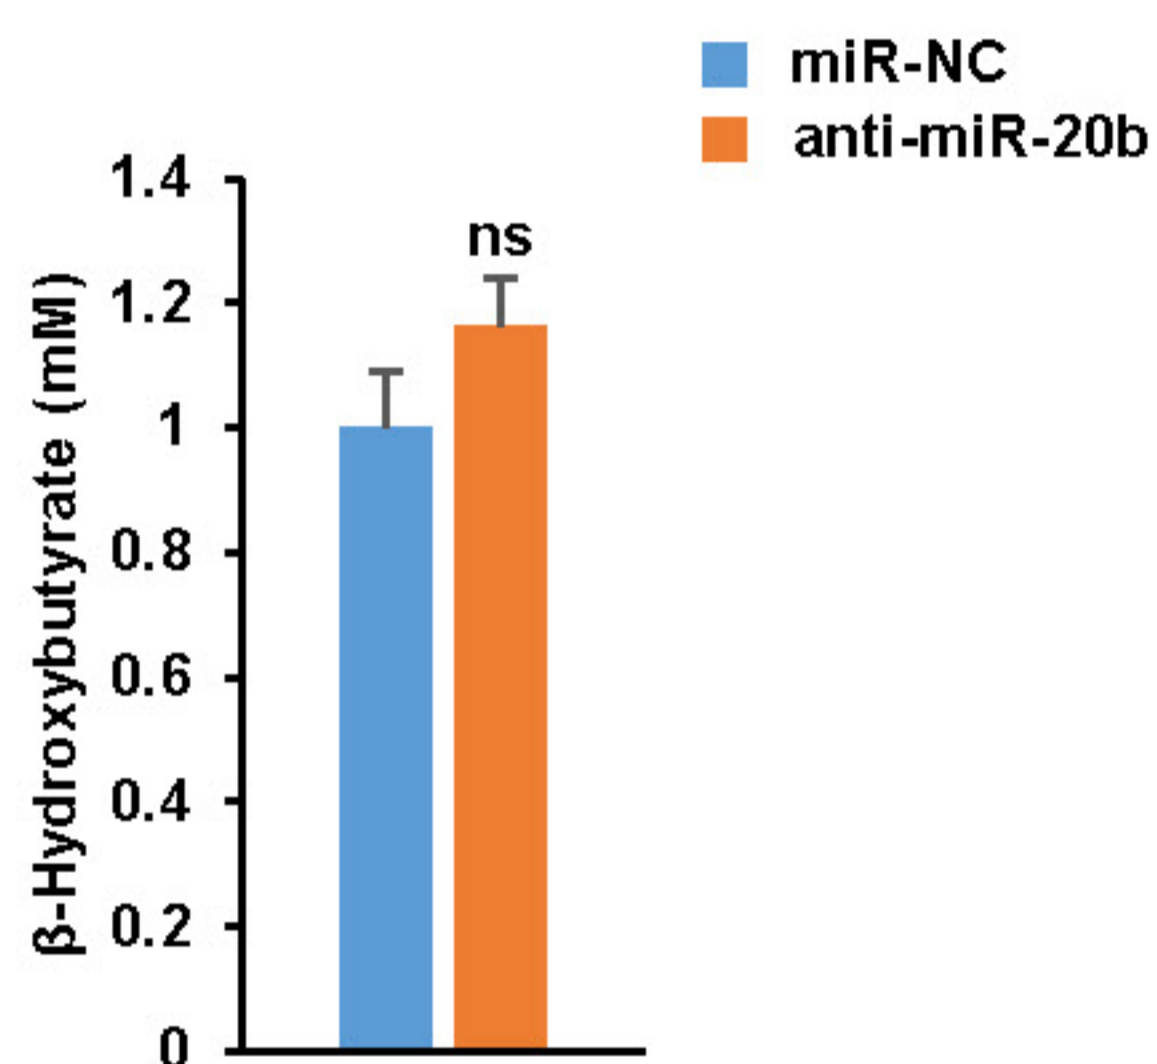



**Figure 3-figure supplement 4. Inhibition of miR-20b alleviates hepatic steatosis in HepG2 cells.**

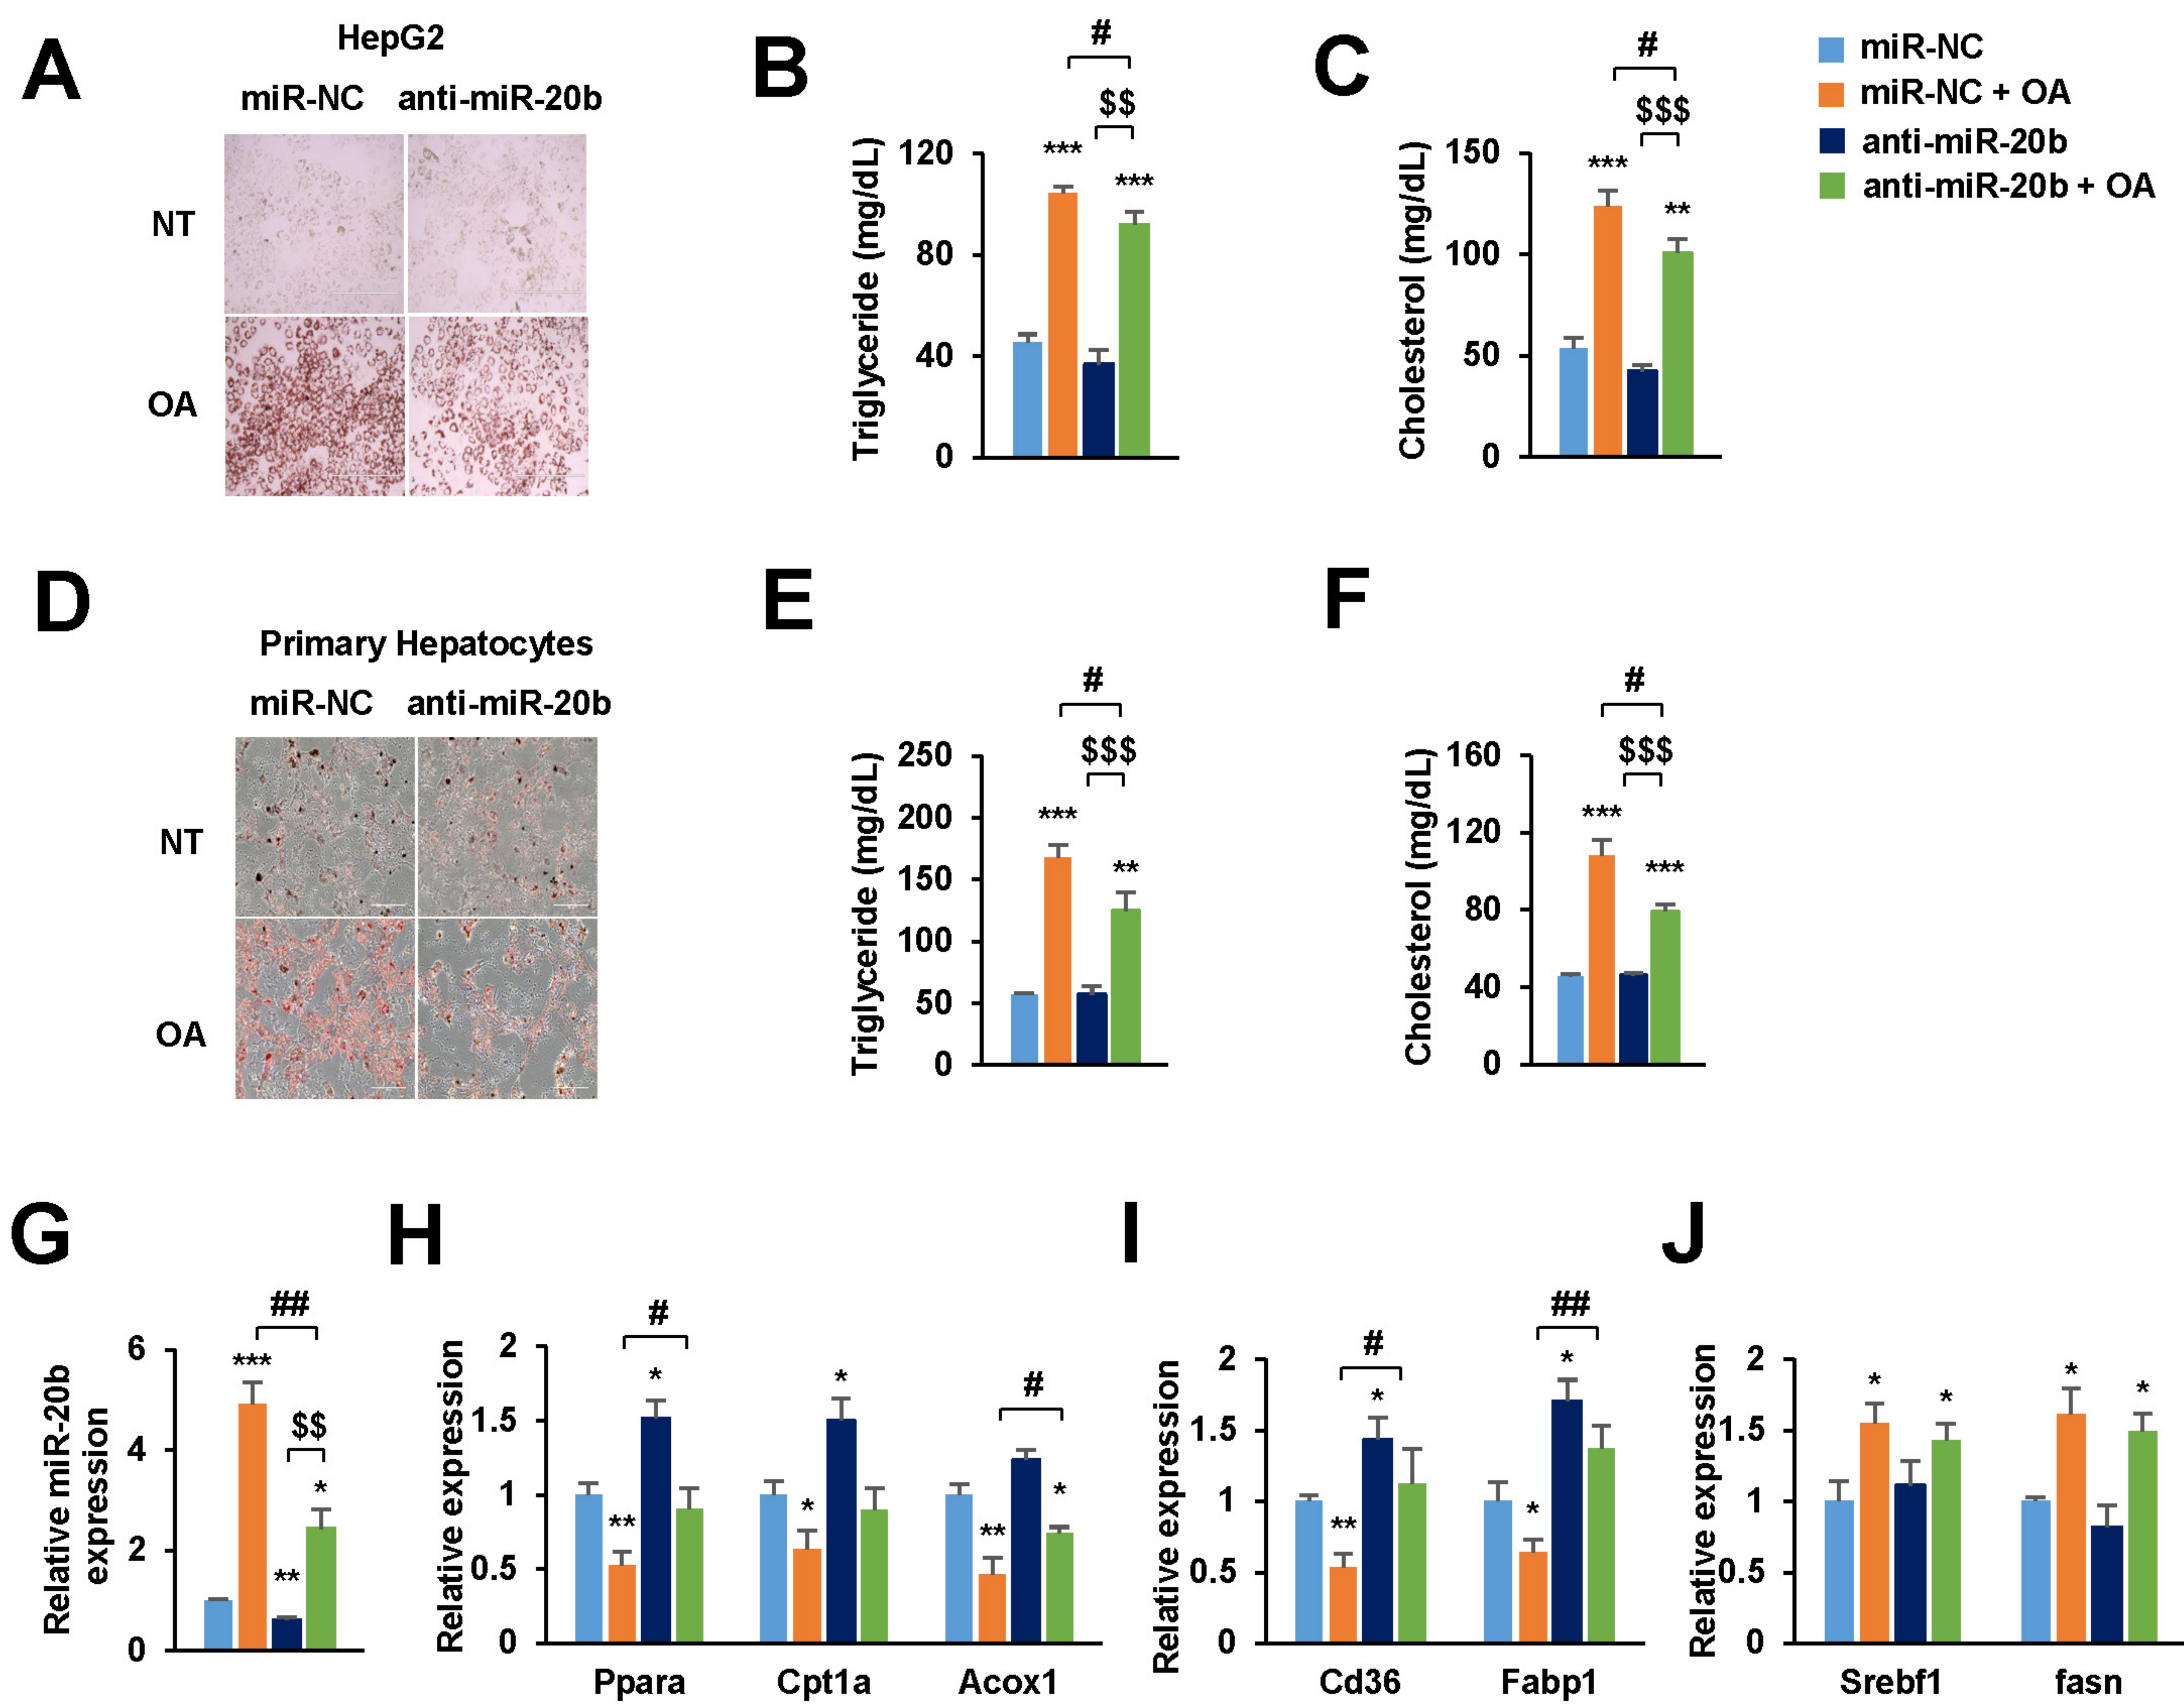



Figure 4. miR-20b promotes hepatic steatosis in HFD-fed mice

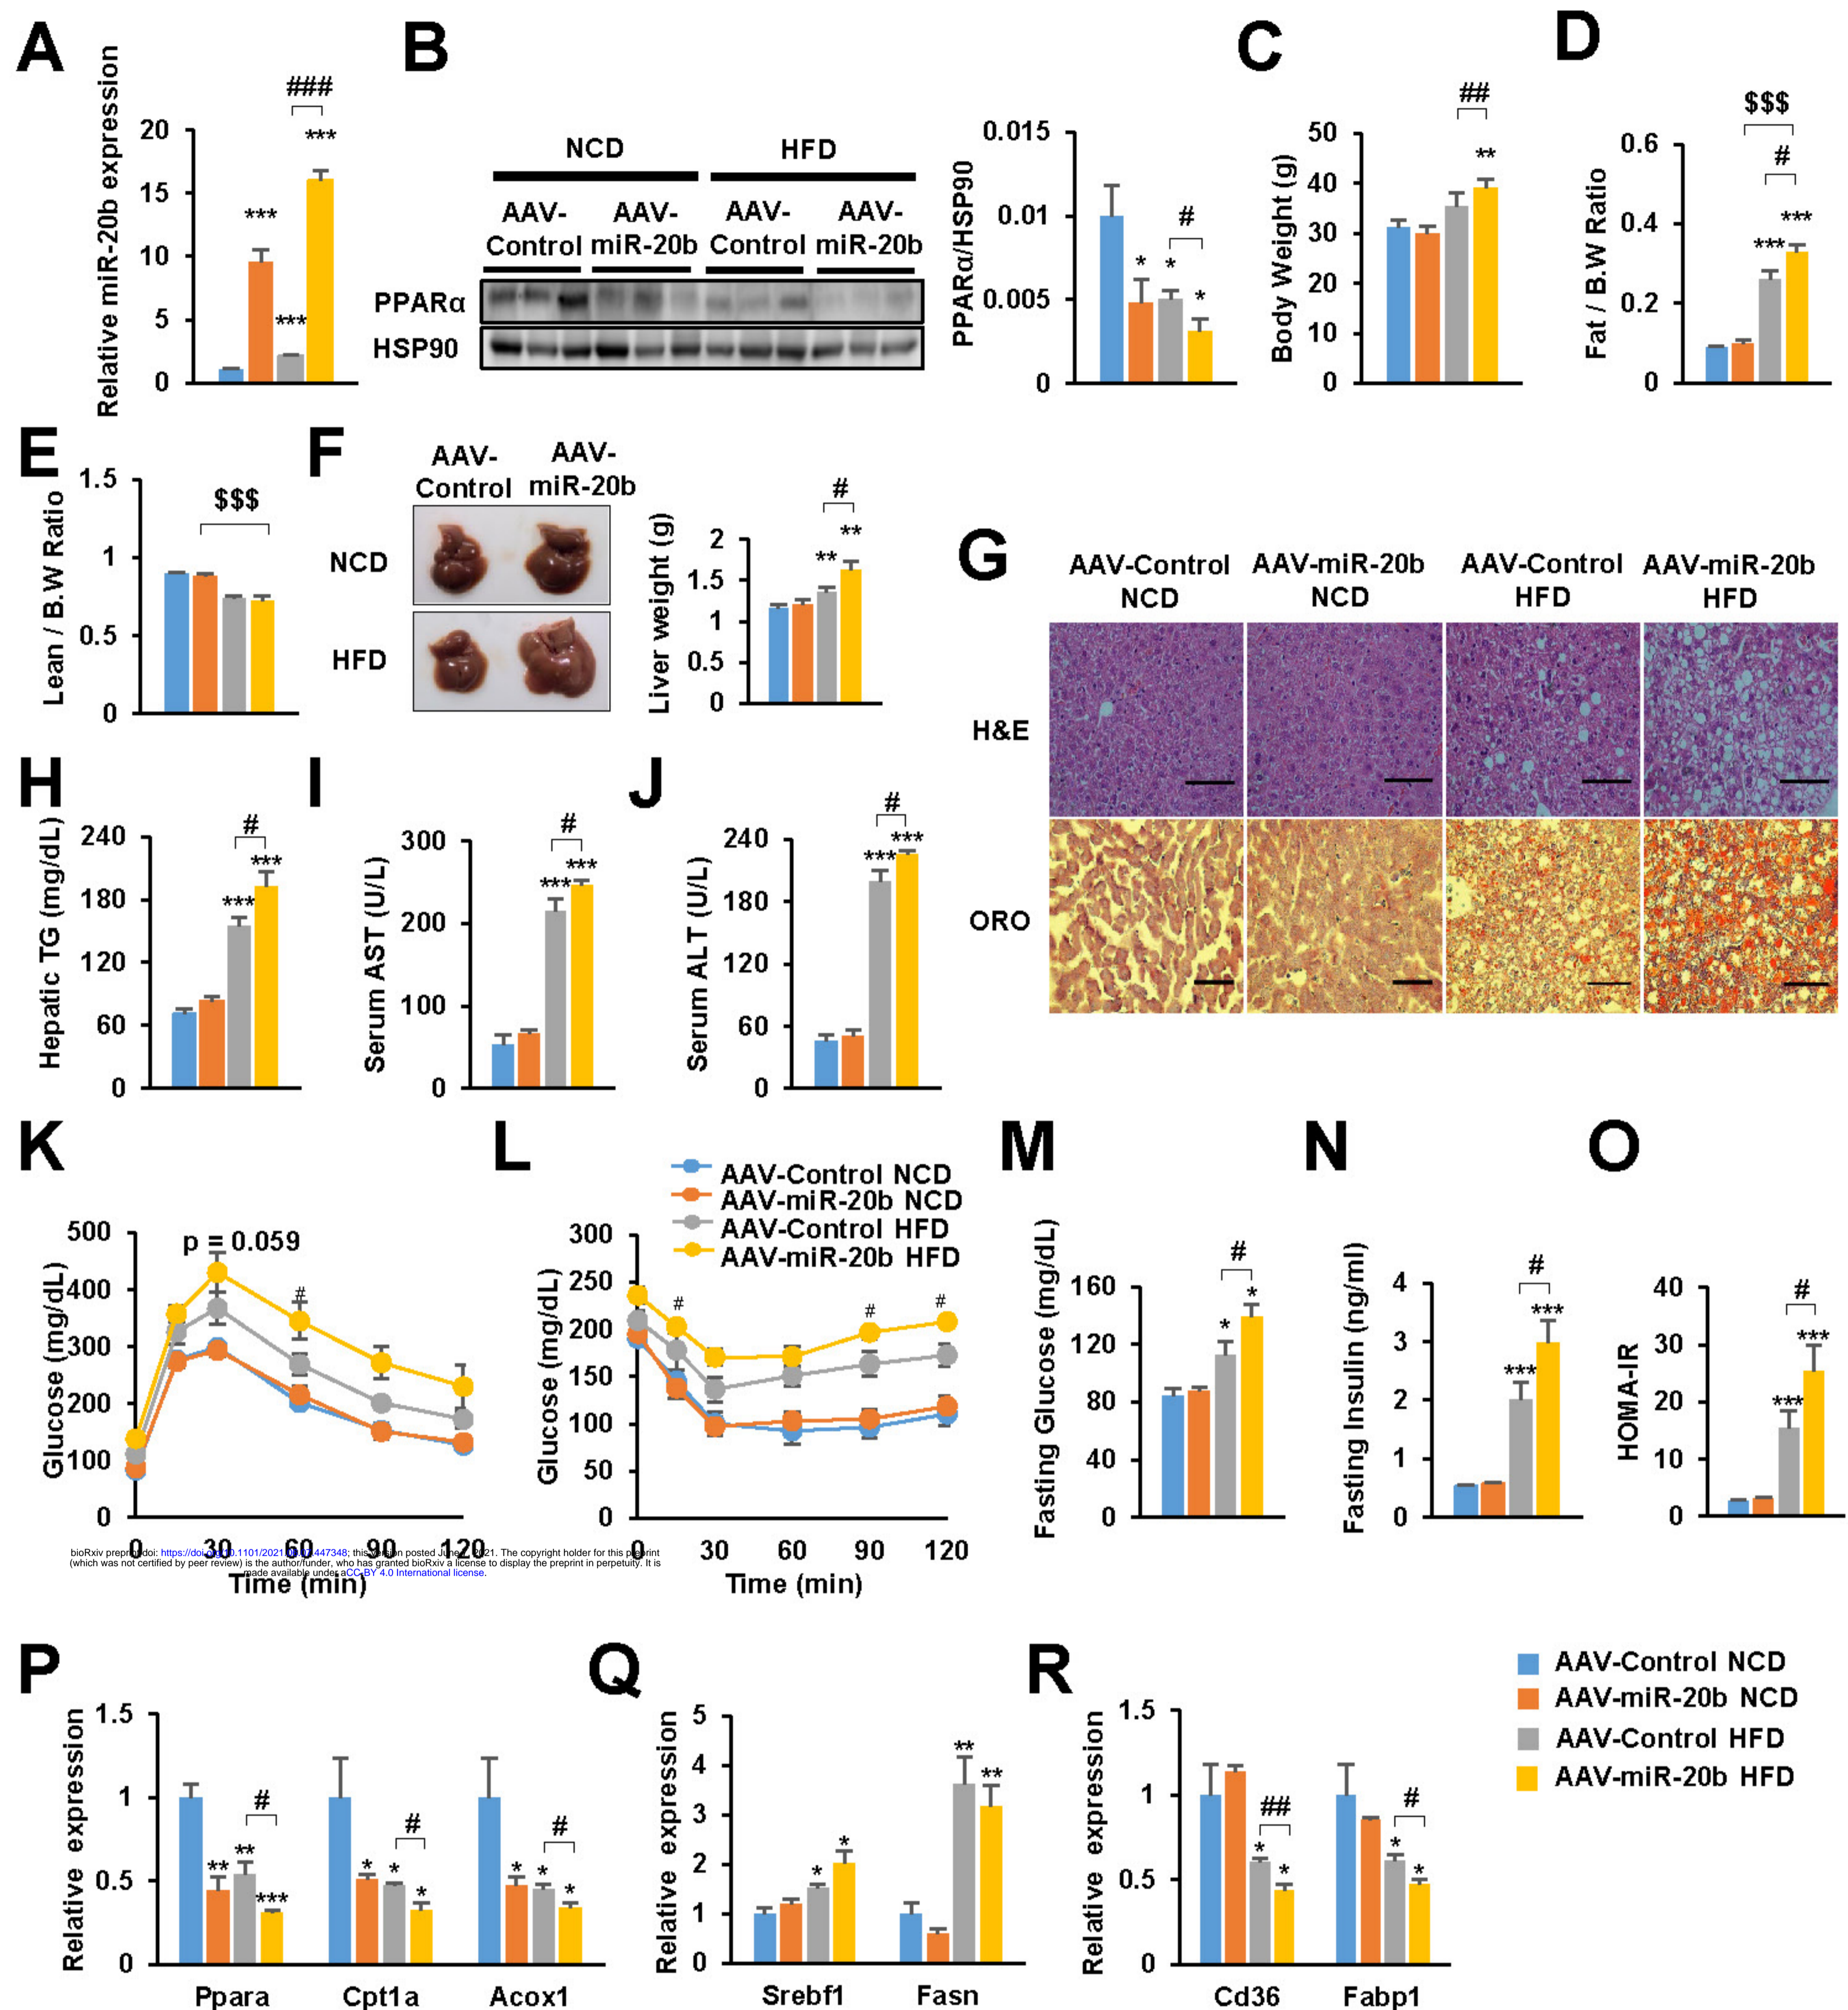



Figure 4-figure supplement 1. The expression of miR-20b in peripheral tissues.

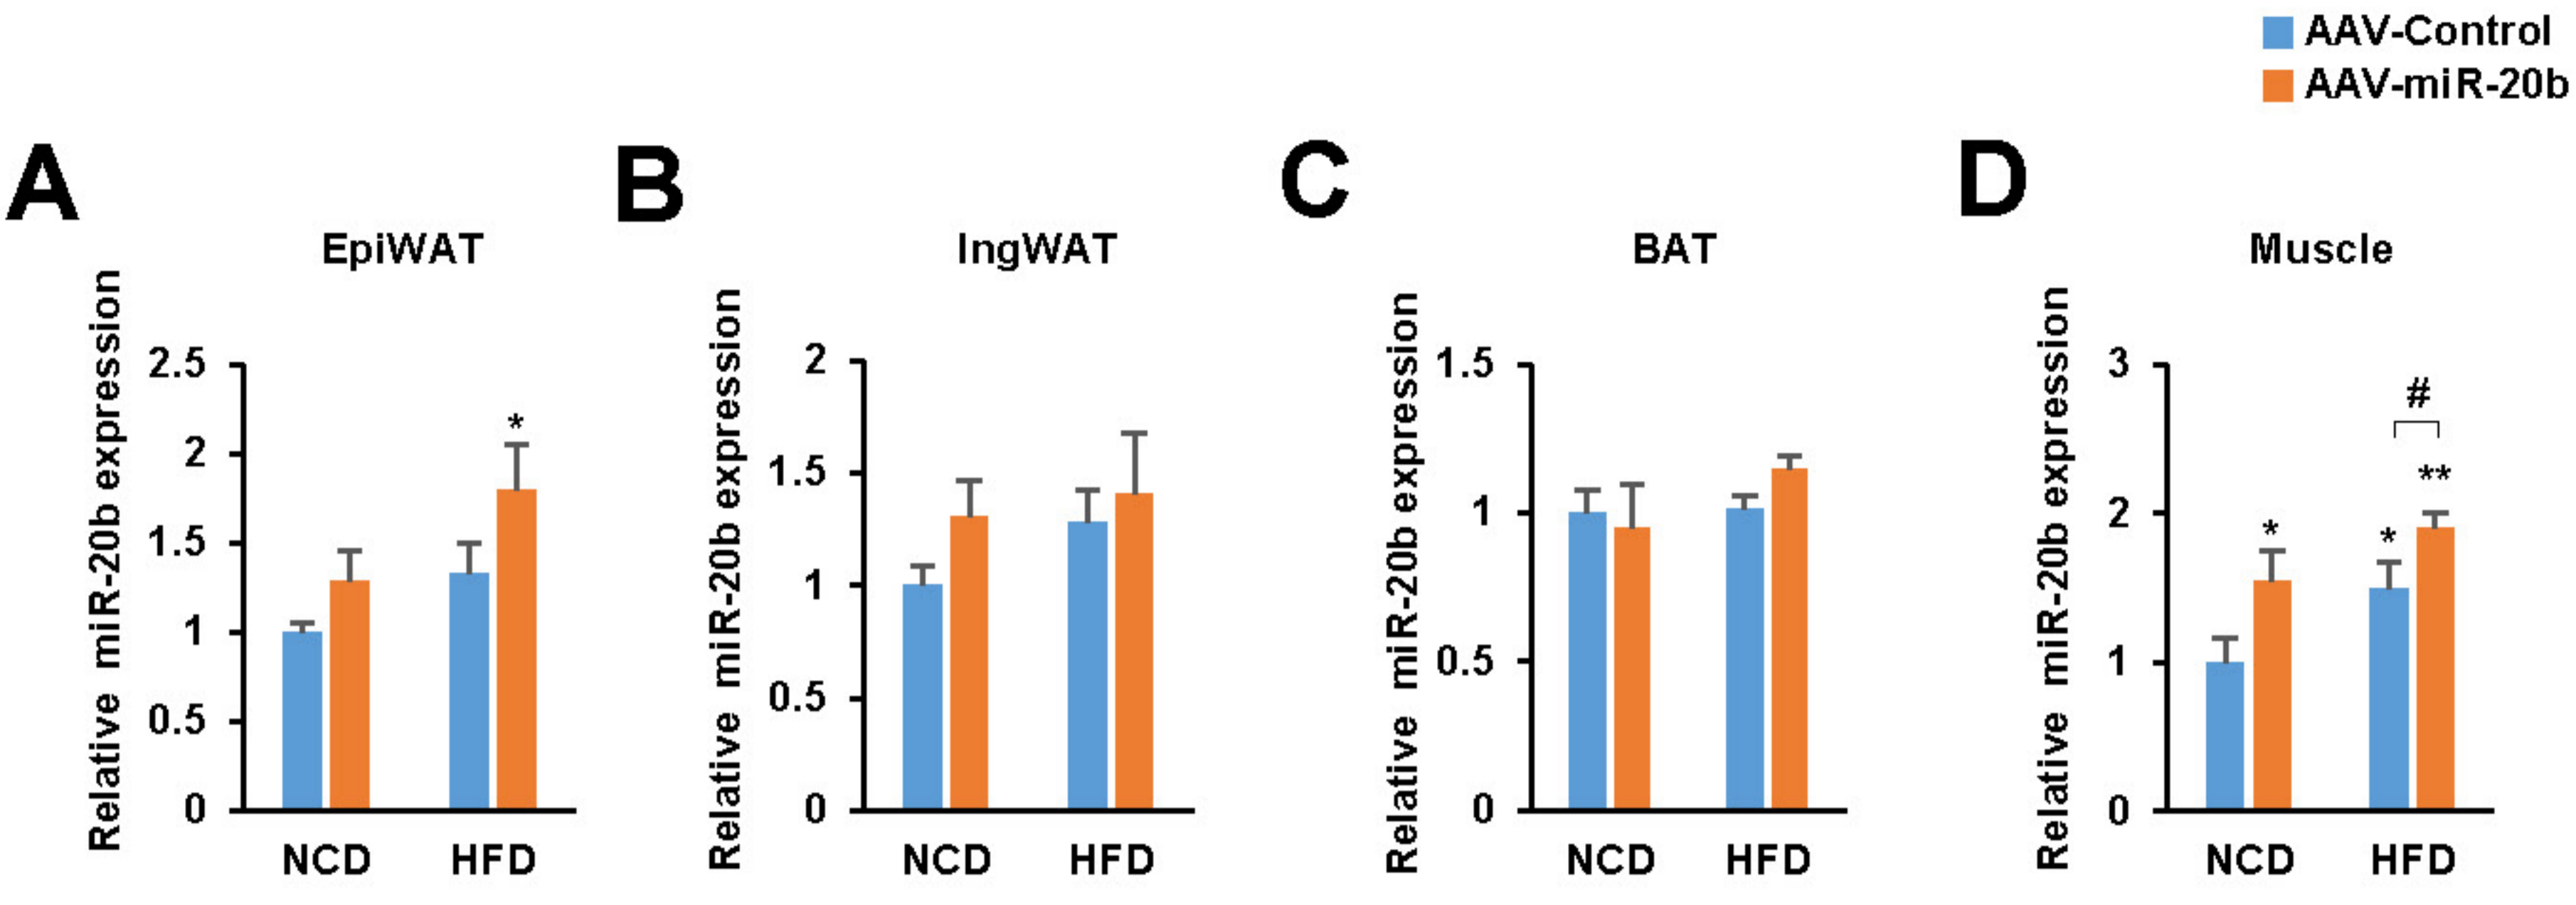

bioRxiv preprint doi: <https://doi.org/10.1101/2021.06.07.447348>; this version posted June 7, 2021. The copyright holder for this preprint (which was not certified by peer review) is the author/funder, who has granted bioRxiv a license to display the preprint in perpetuity. It is made available under aCC-BY 4.0 International license.

Figure 4-figure supplement 2. The weight of peripheral tissues with AAV-miR-20b

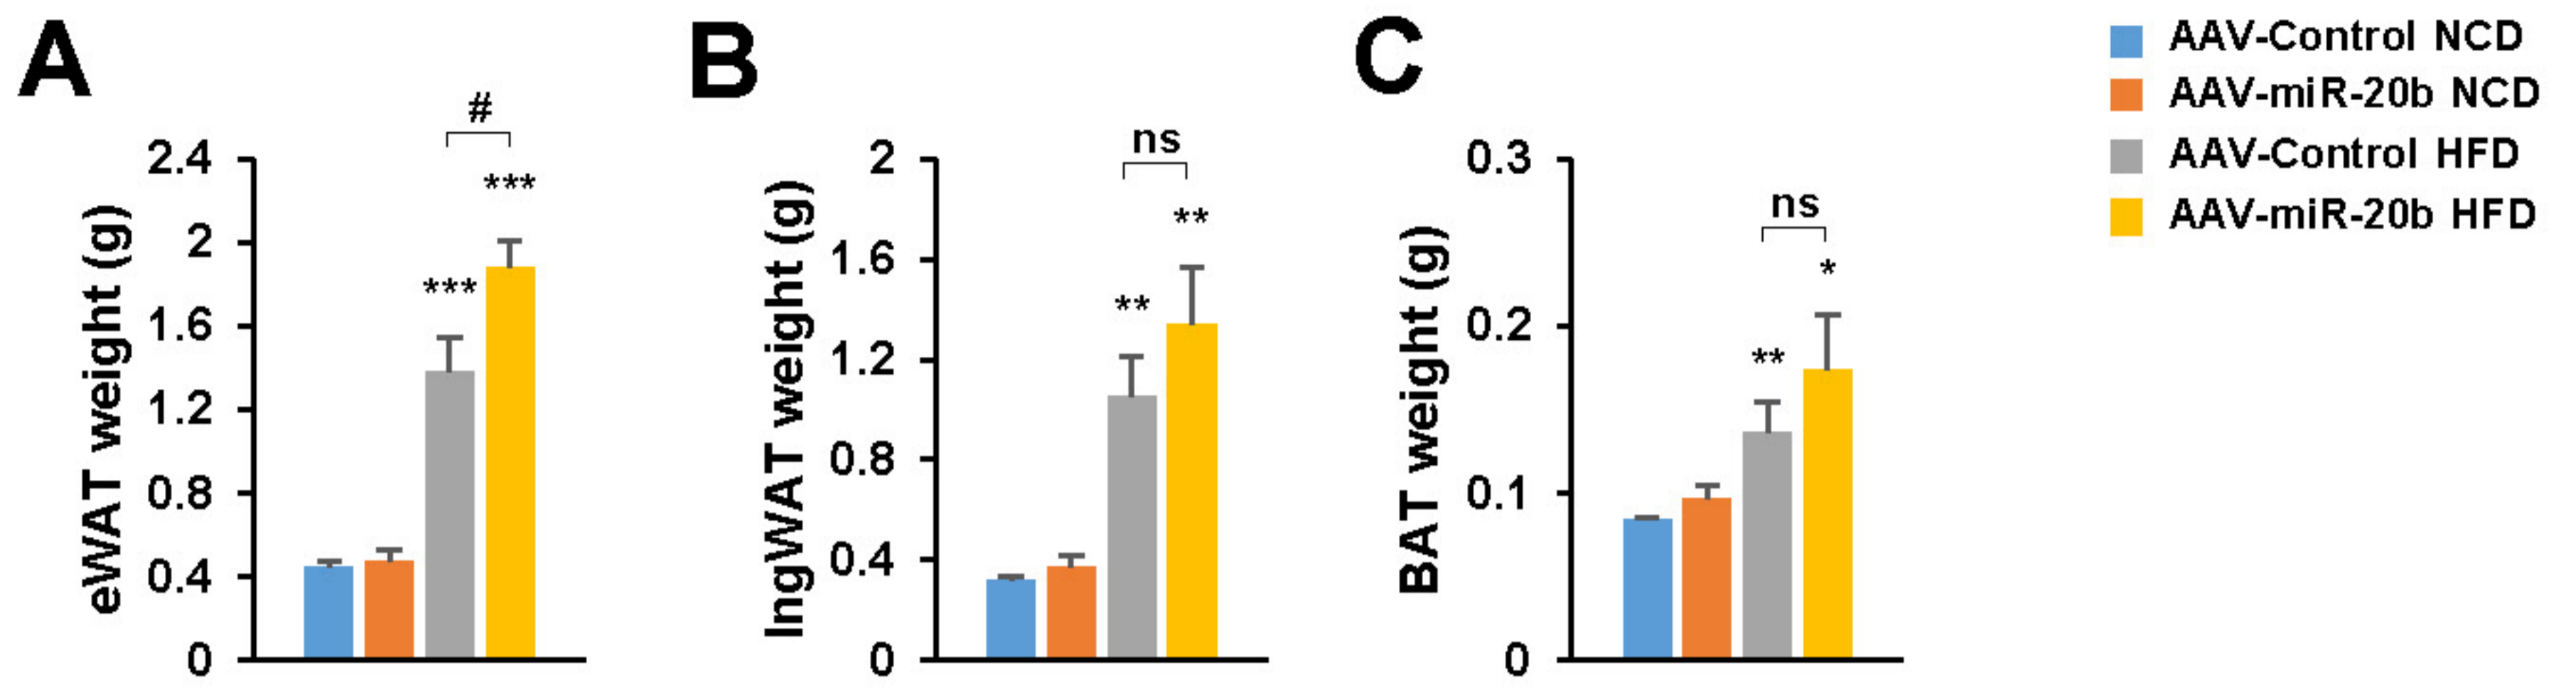



Figure 5. Inhibition of miR-20b alleviates hepatic steatosis in HFD-fed mice.

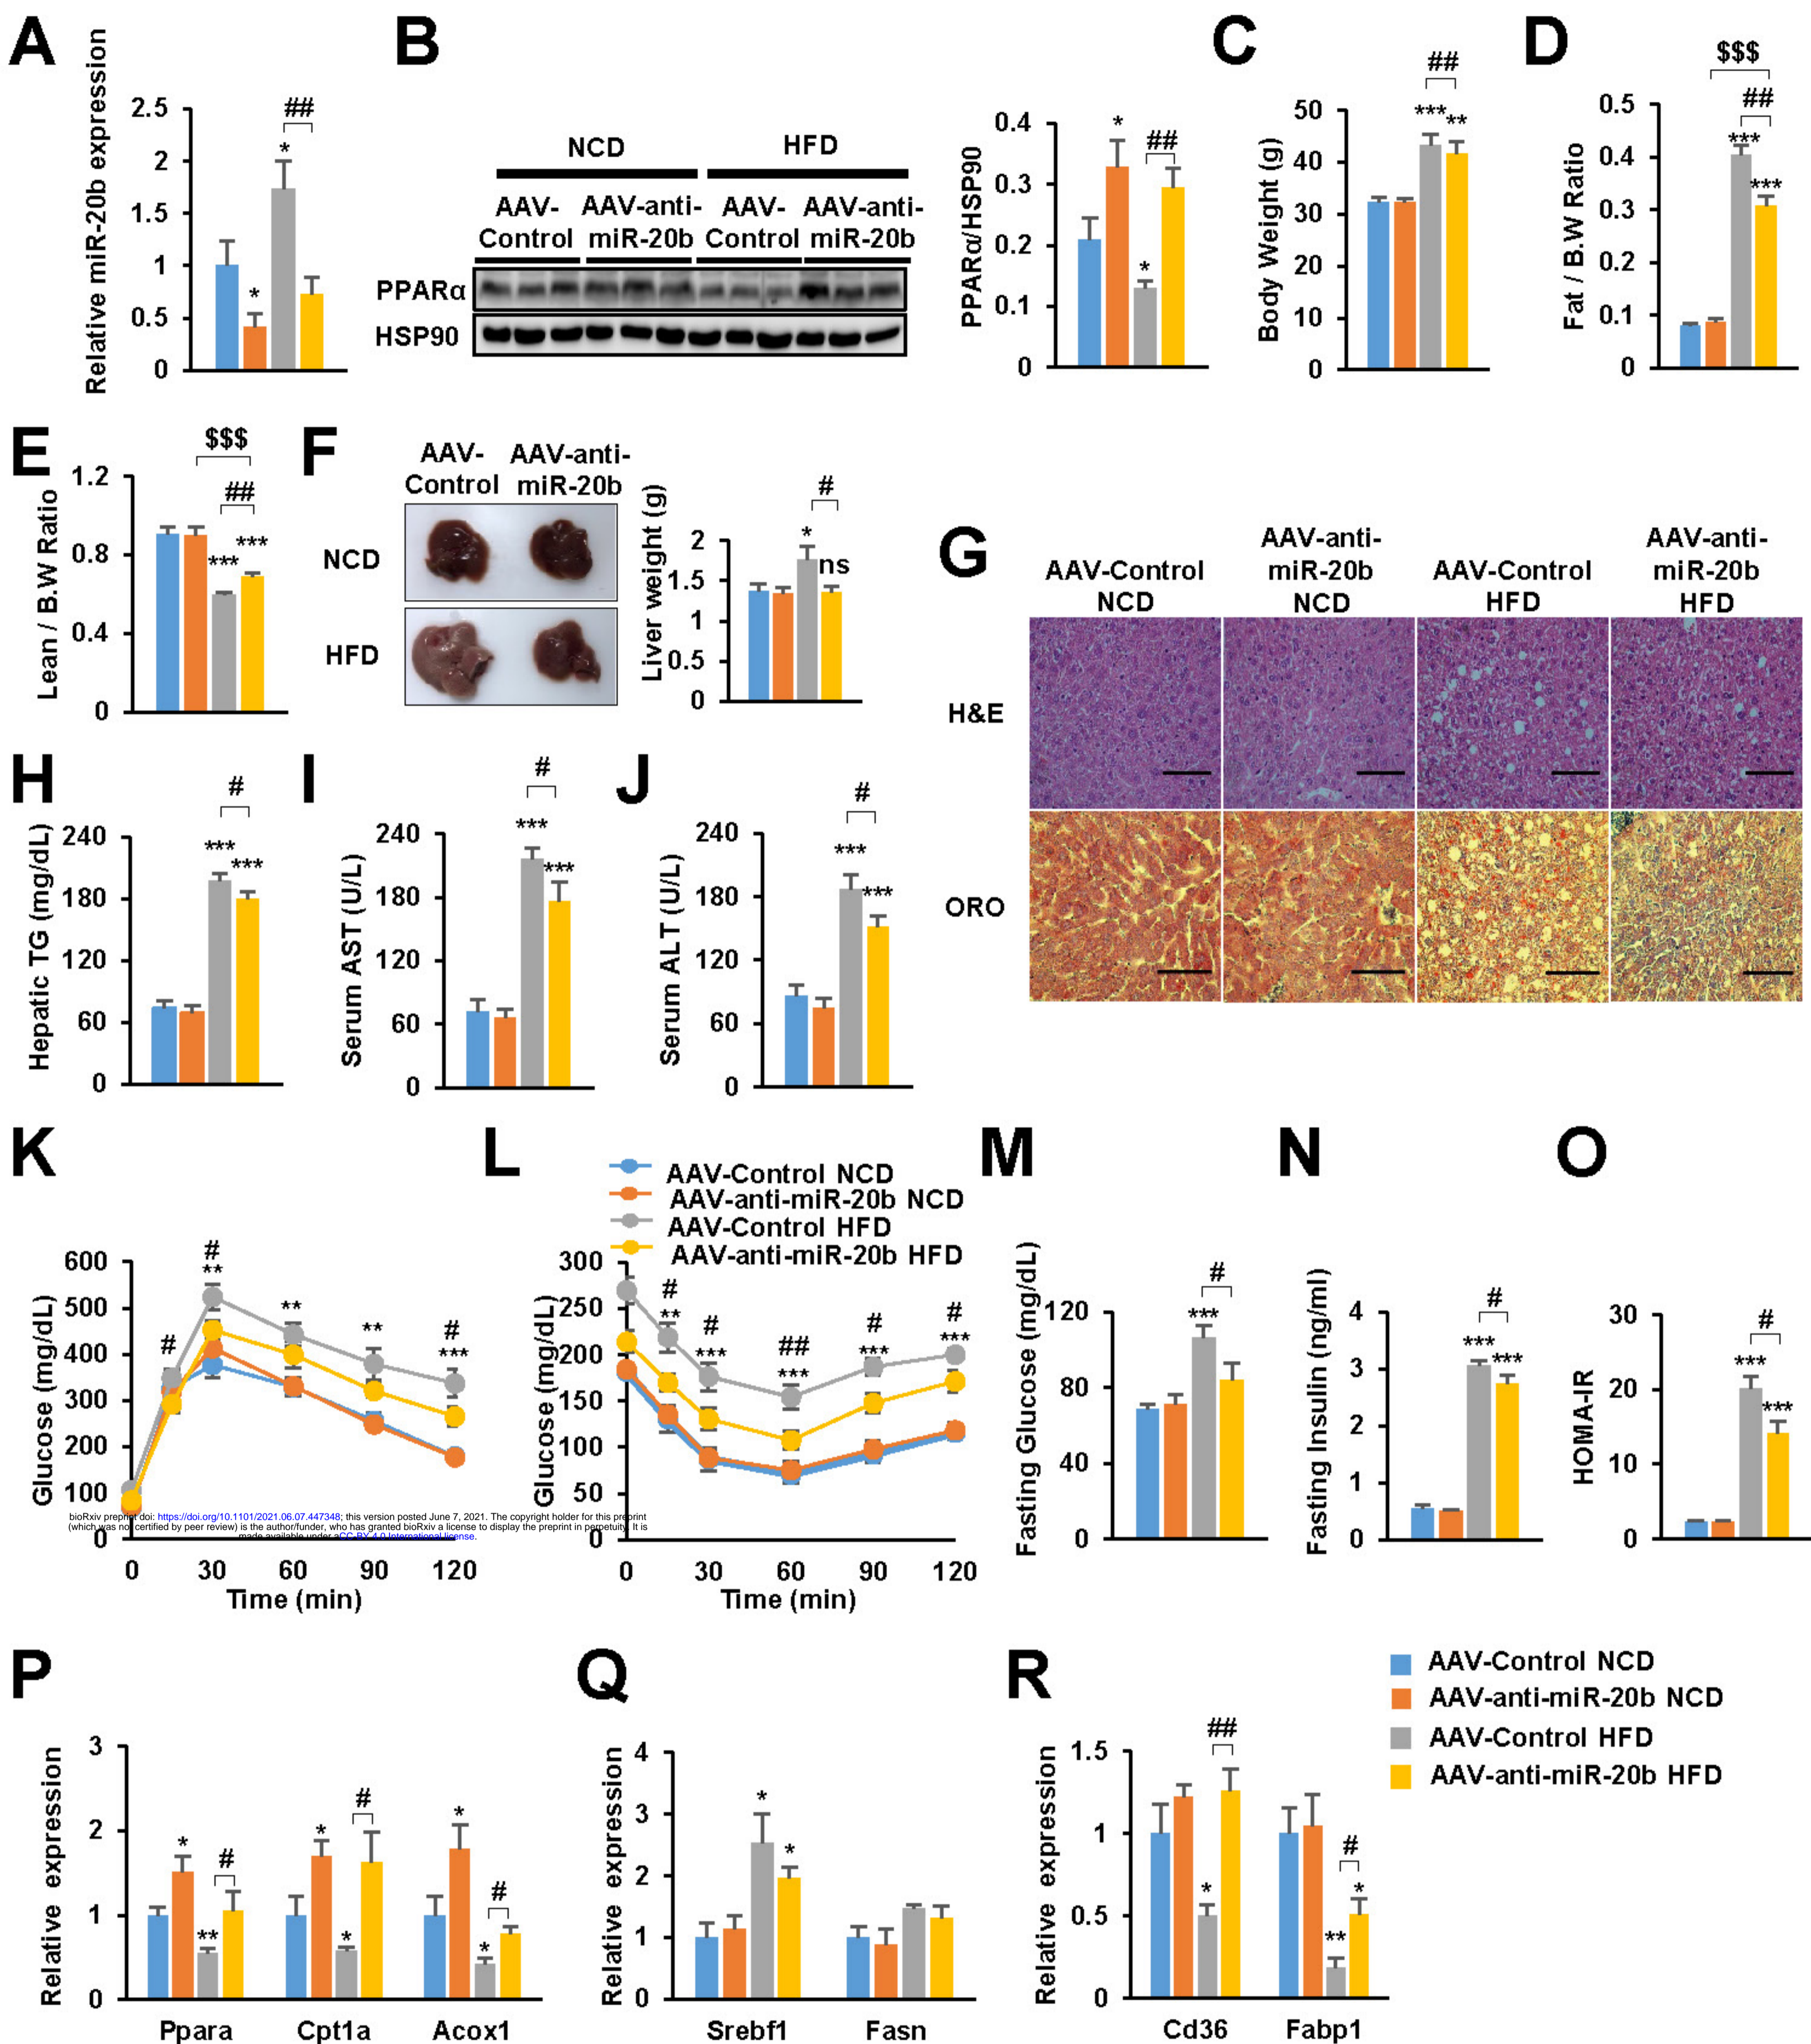



Figure 5-figure supplement 1. The weight of peripheral tissues with AAV-anti-miR-20b

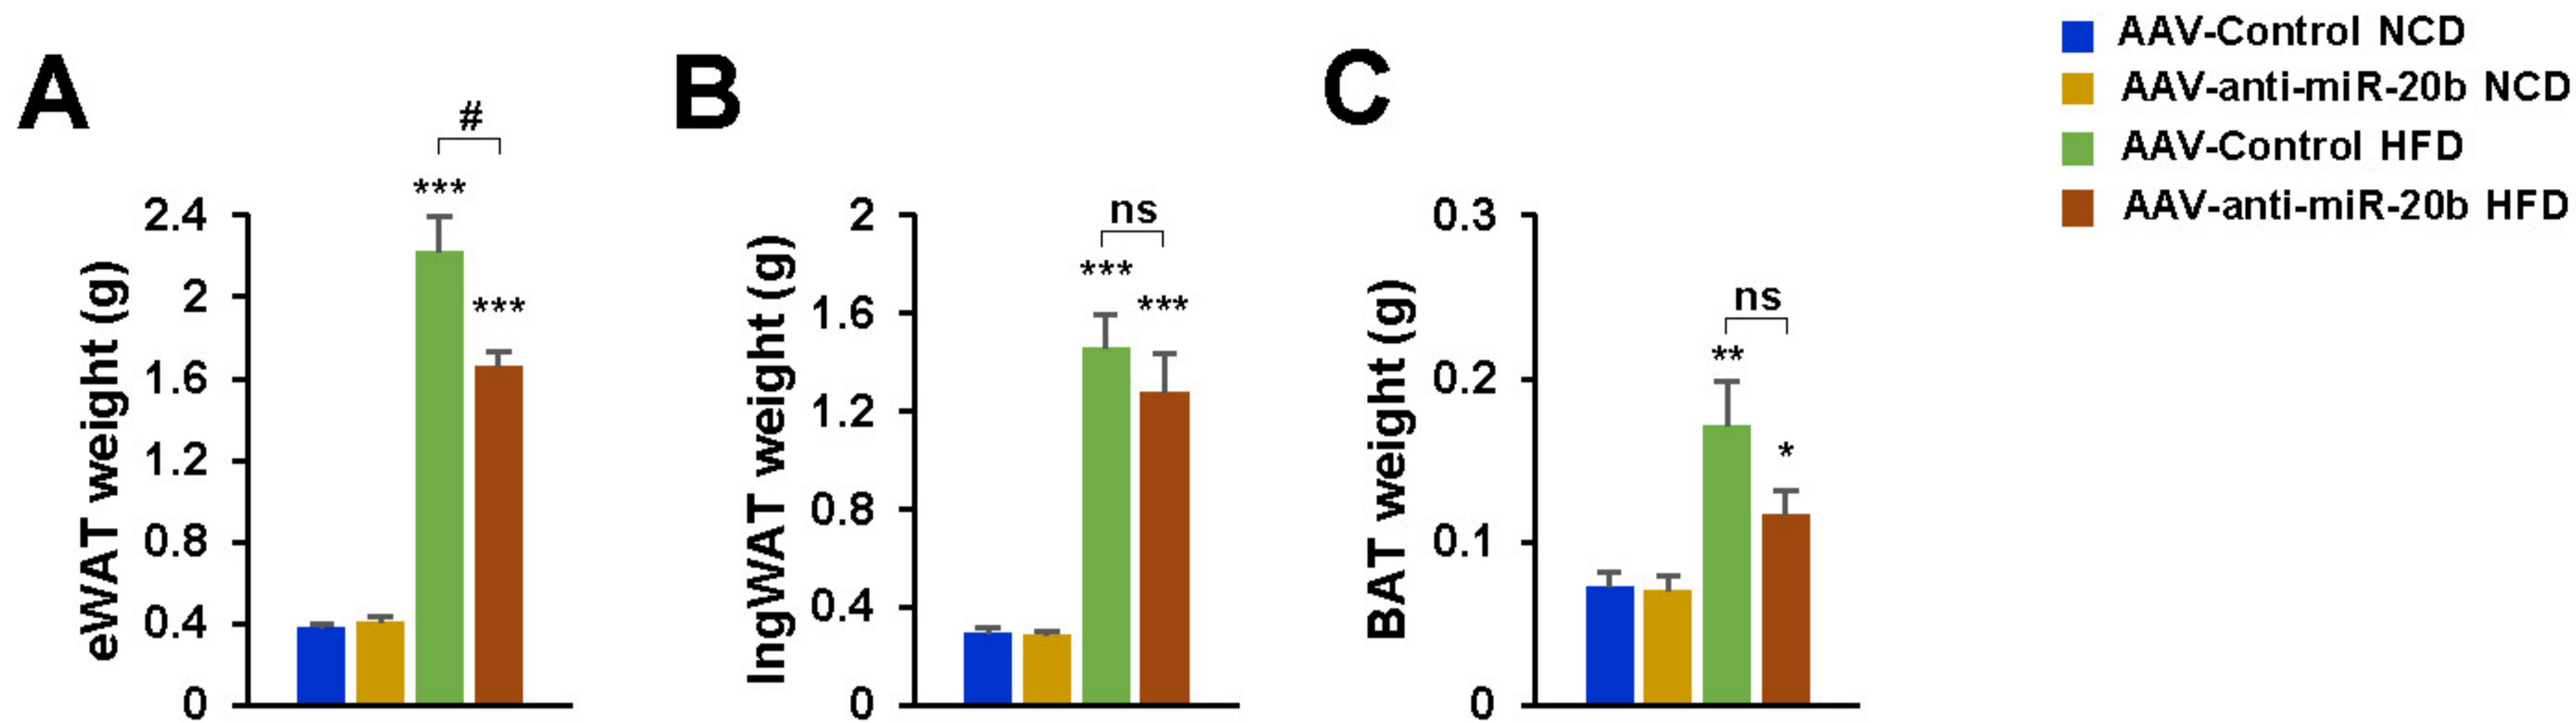

Figure 6. The effects of miR-20b are mediated by PPAR $\alpha$ .

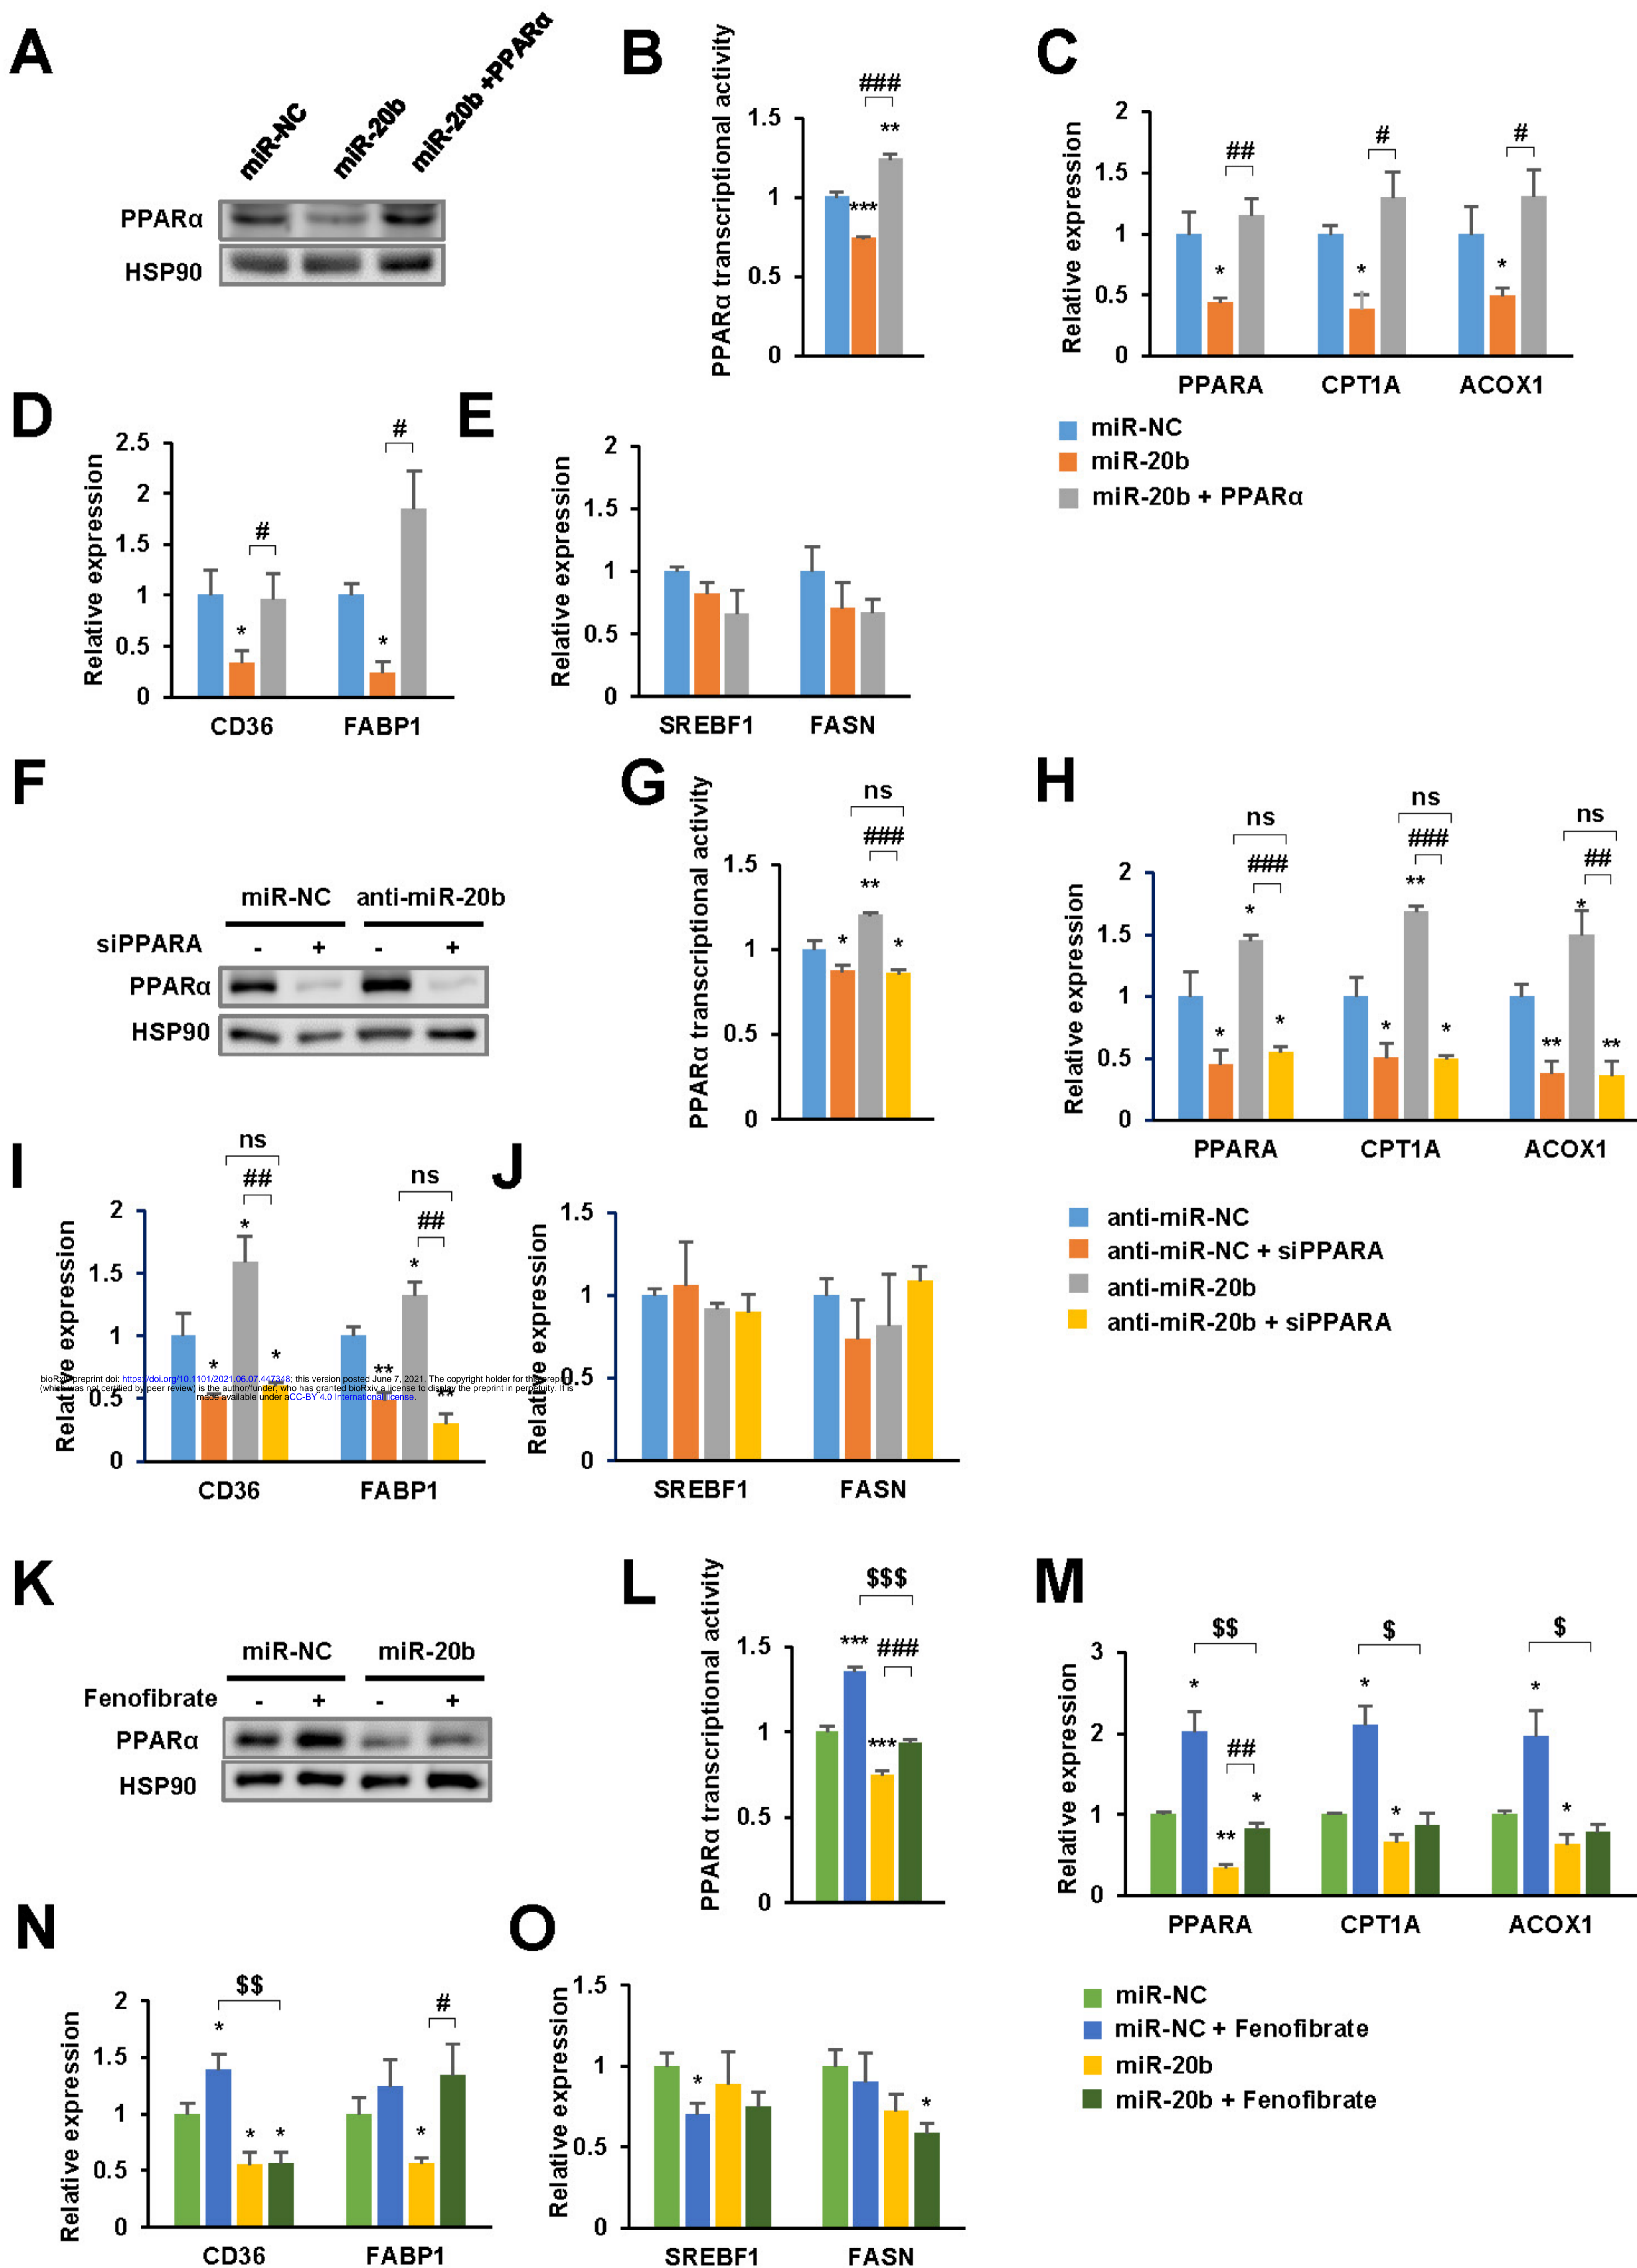



Figure 7. The effects of fenofibrate are limited in miR-20b-introduced mice.

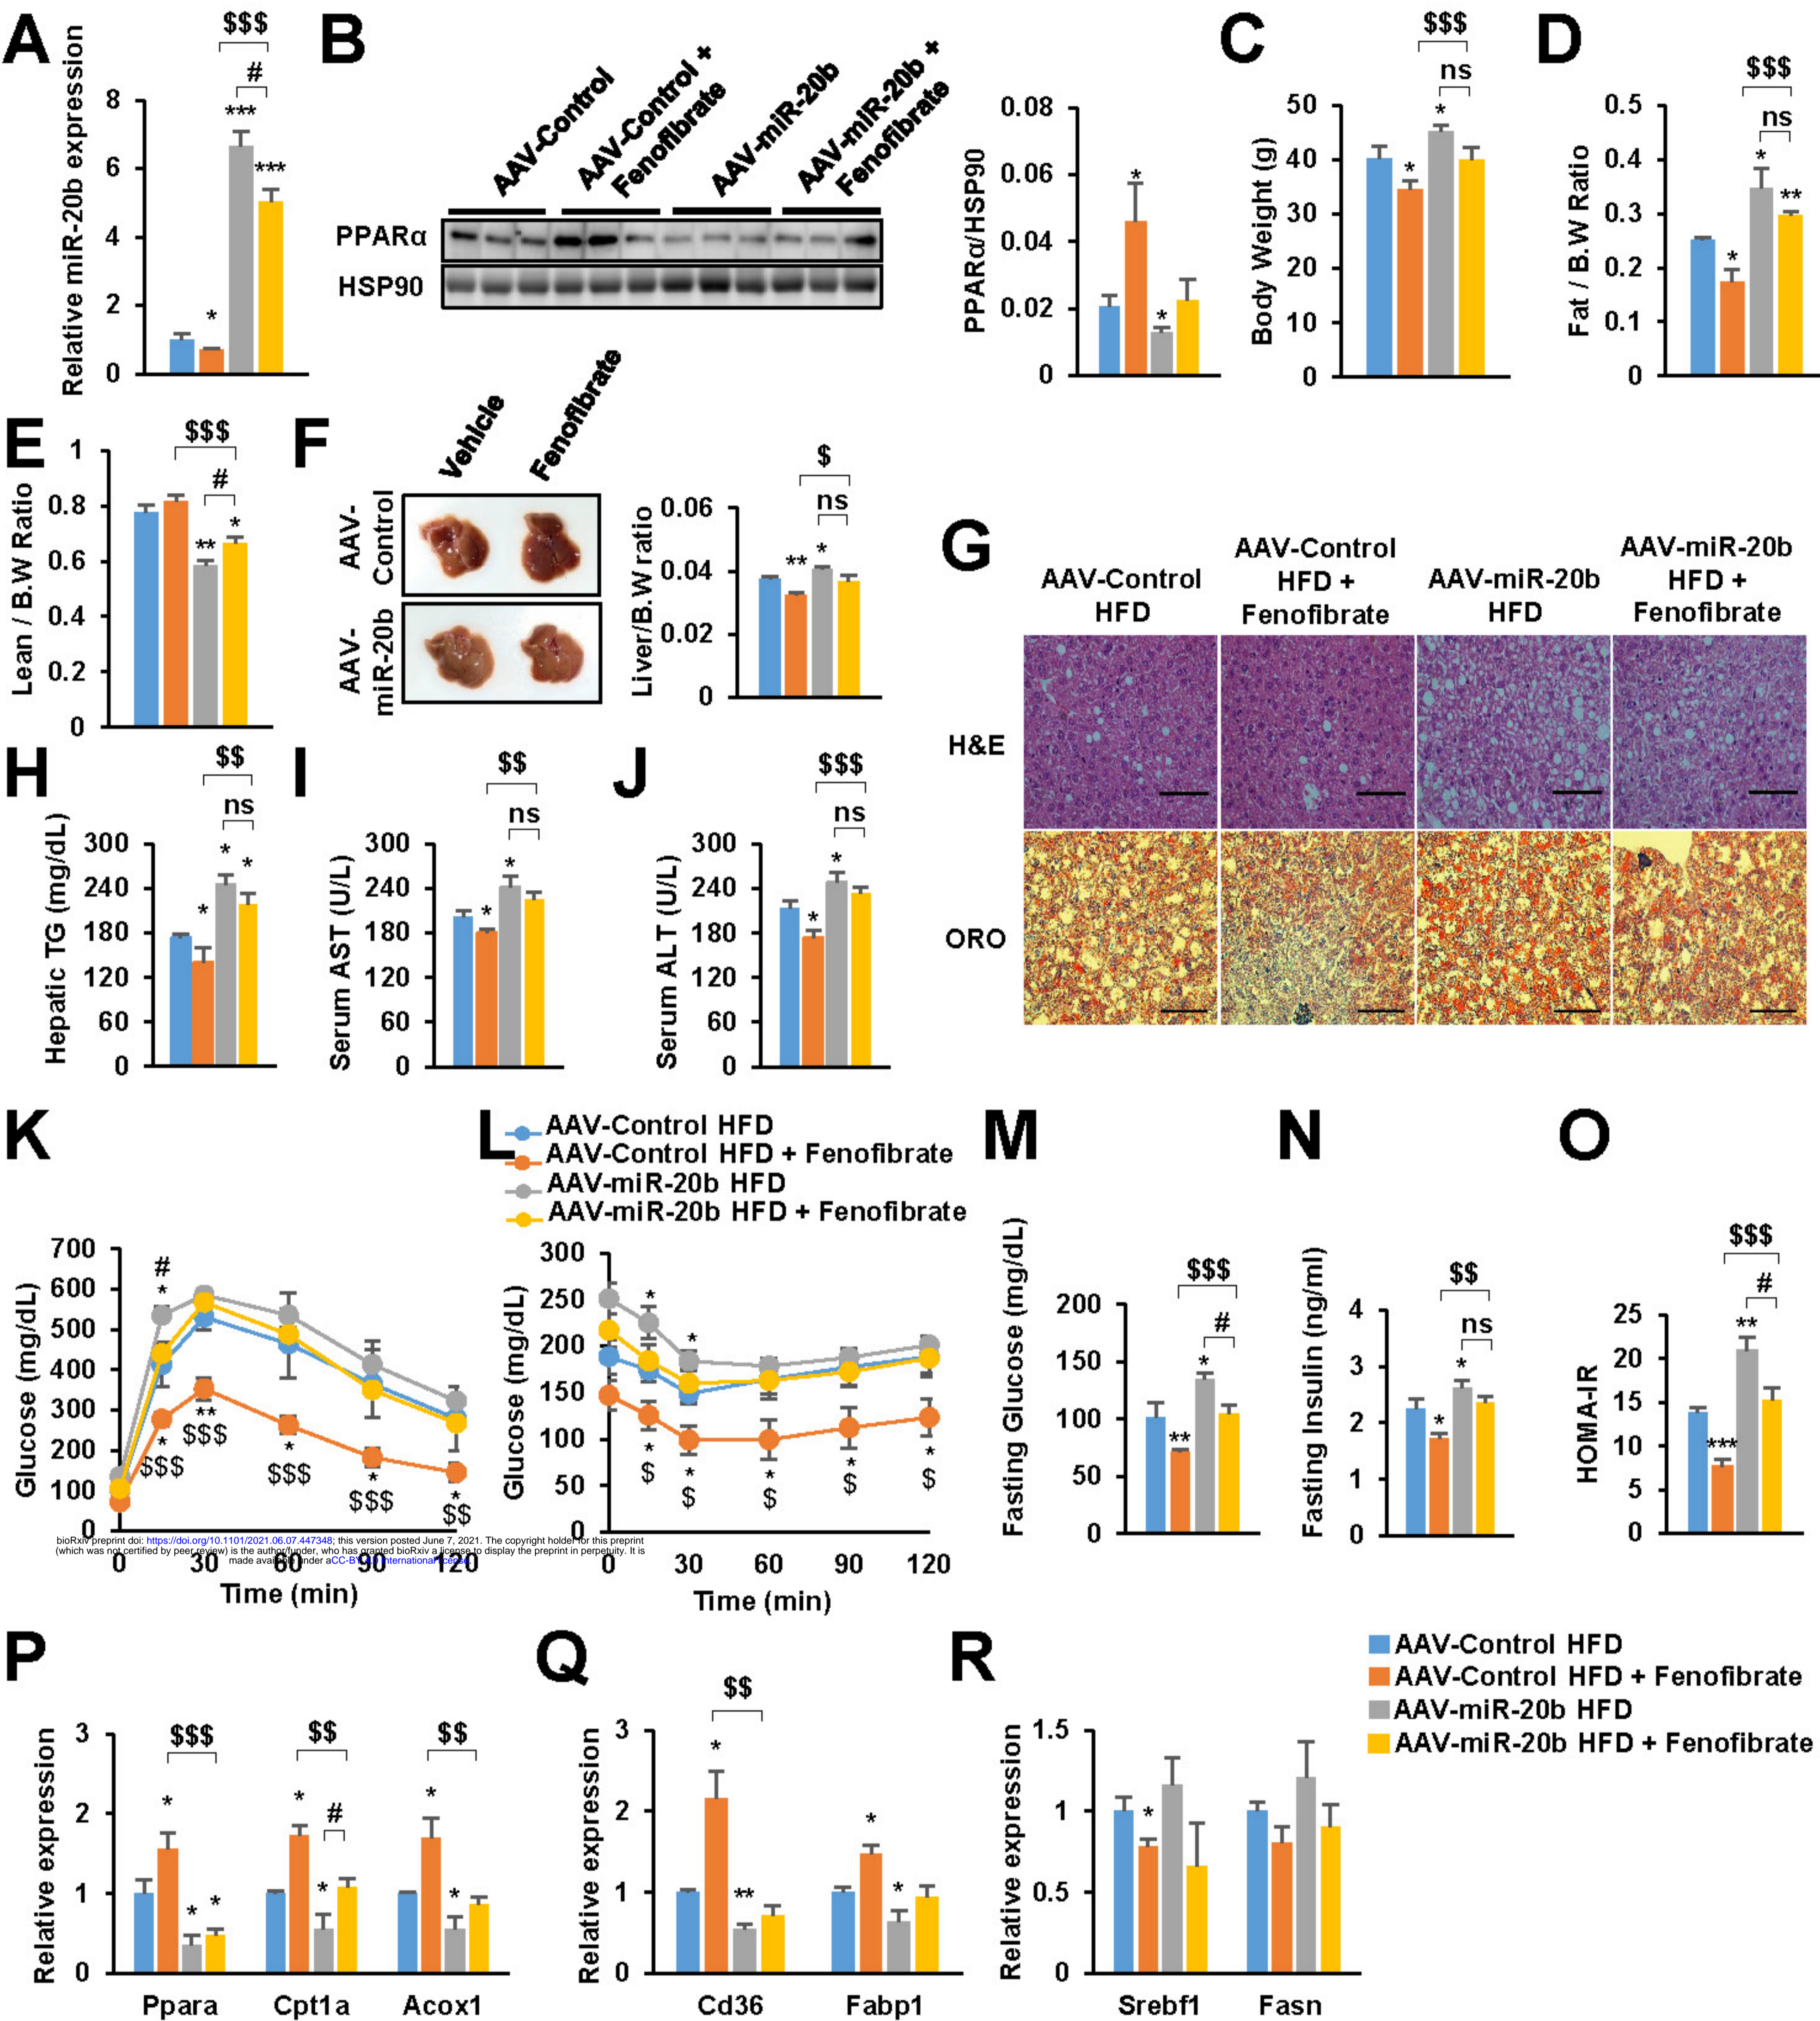



Figure 8. miR-20b promotes liver inflammation and fibrosis in MCD-Fed Mice.

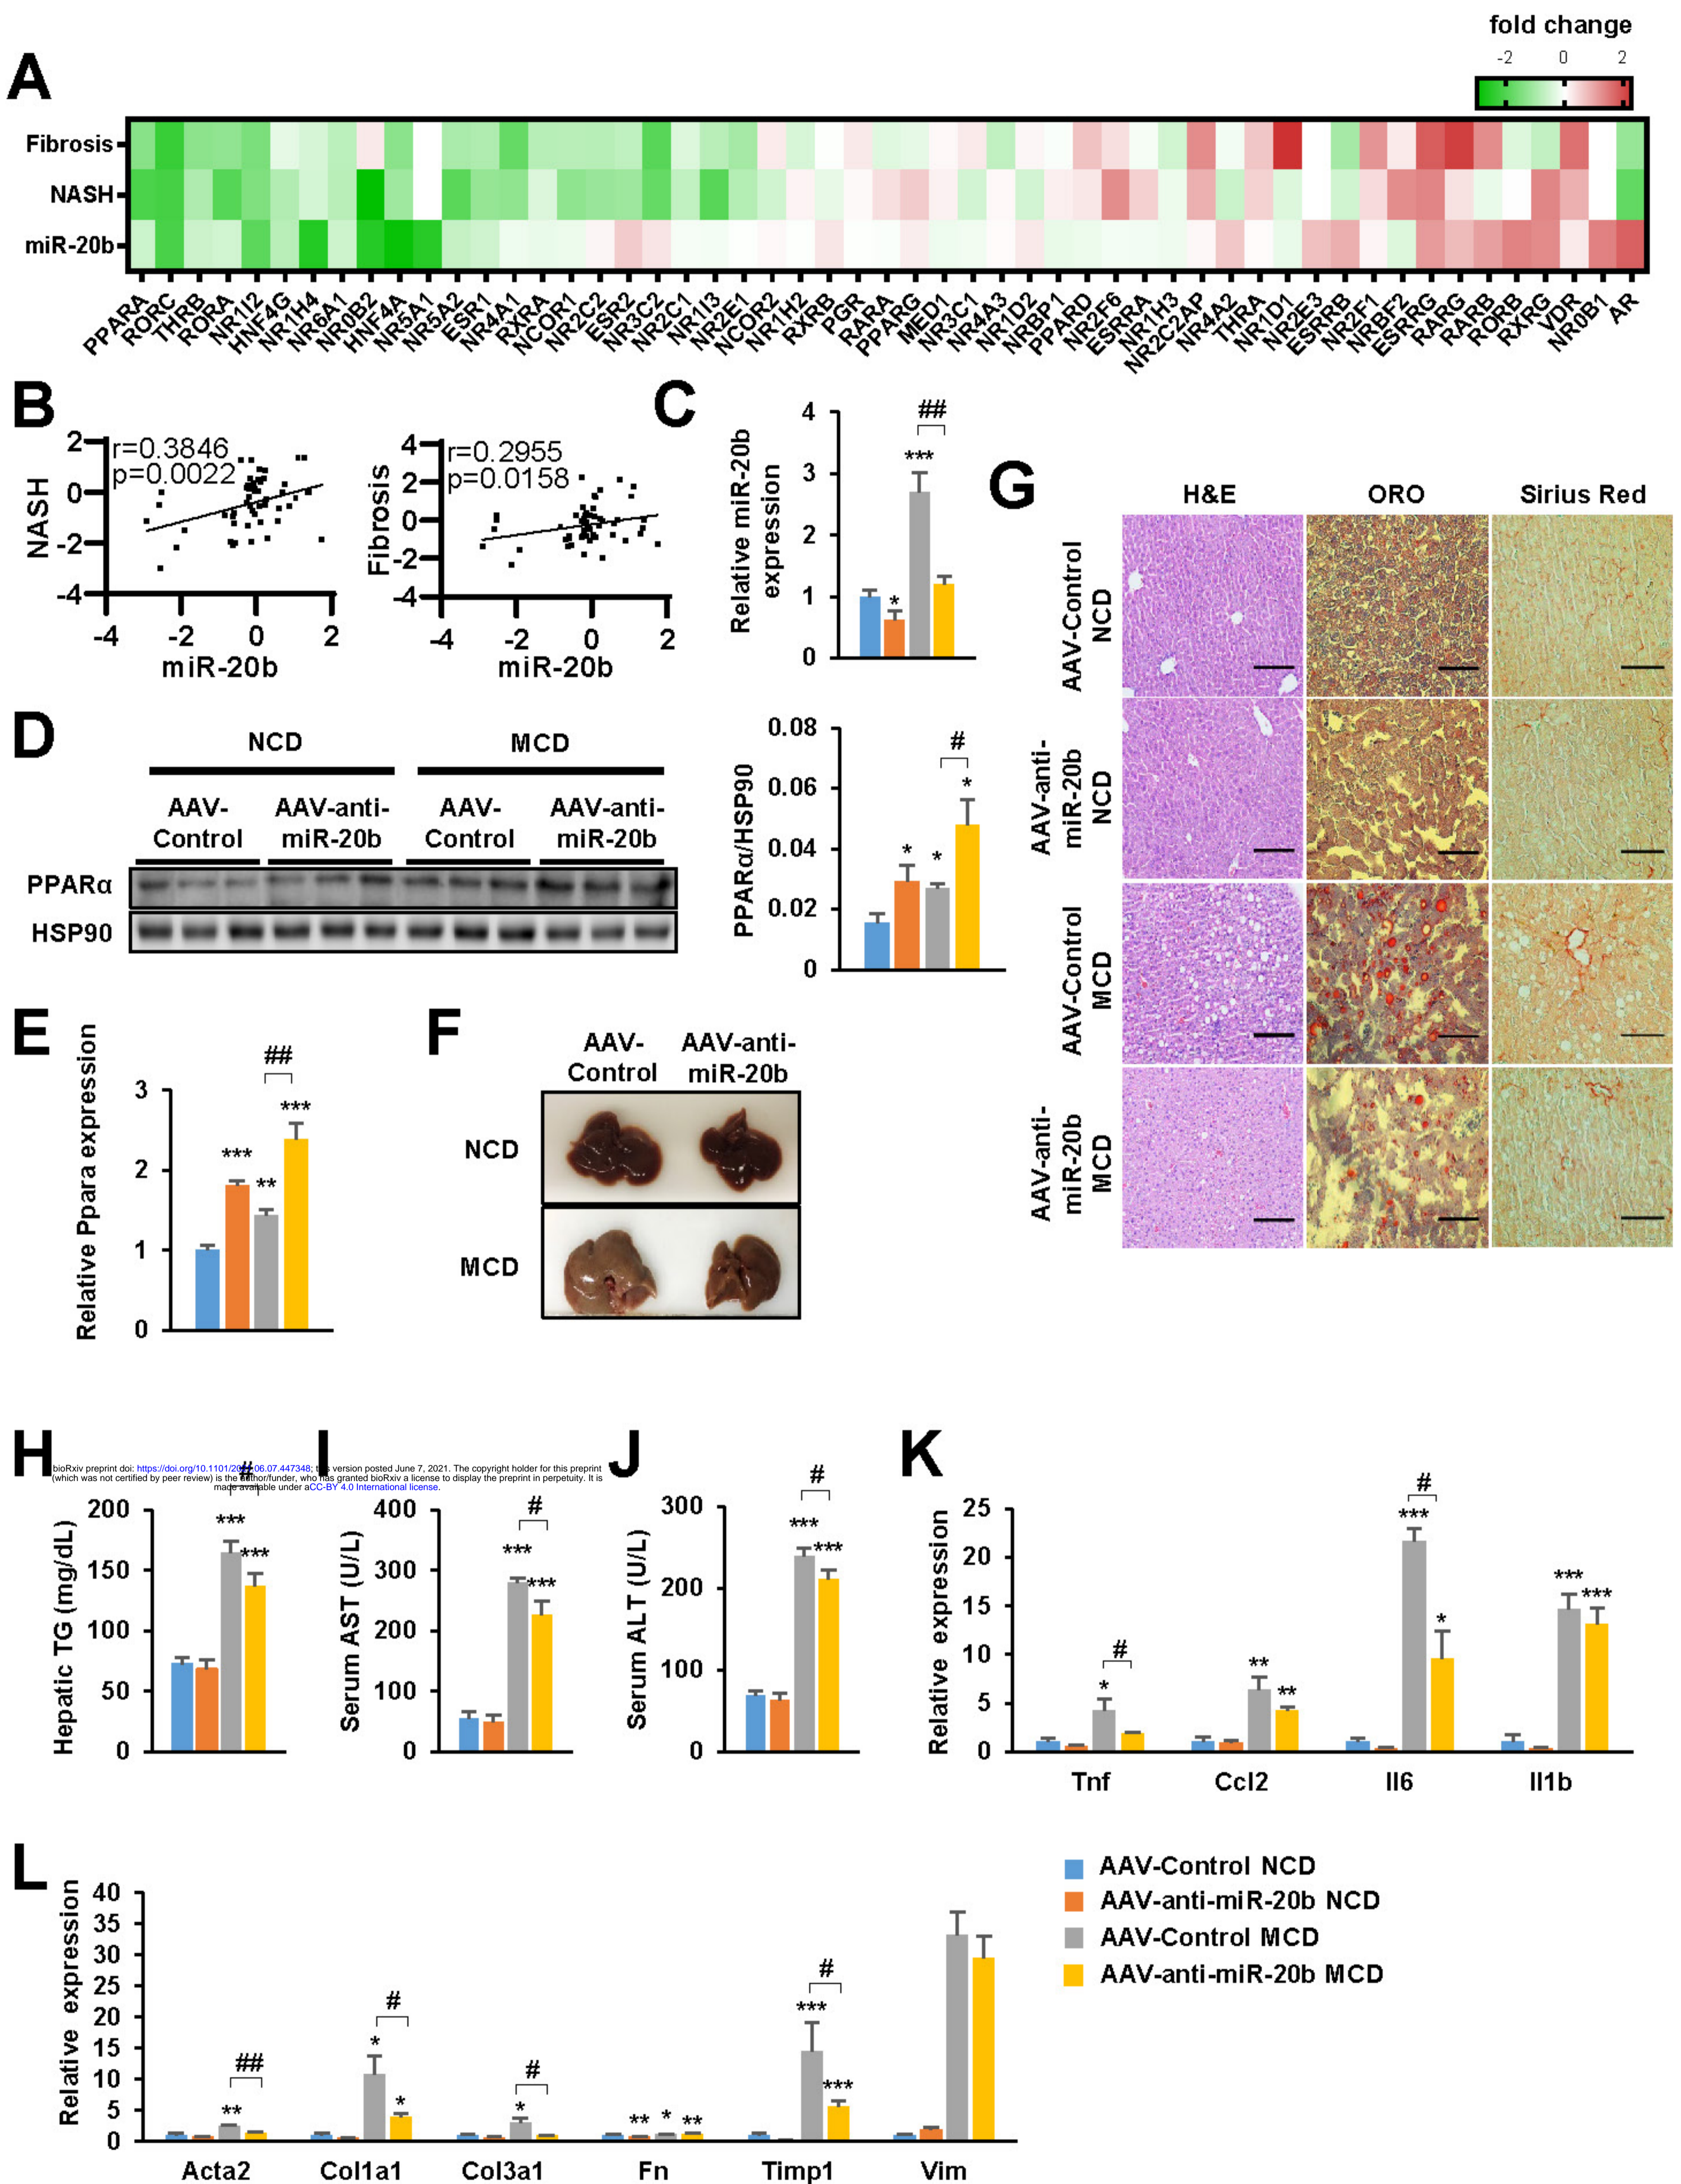



Figure 9. E2F1 is upregulated in both NAFLD patients and mice model

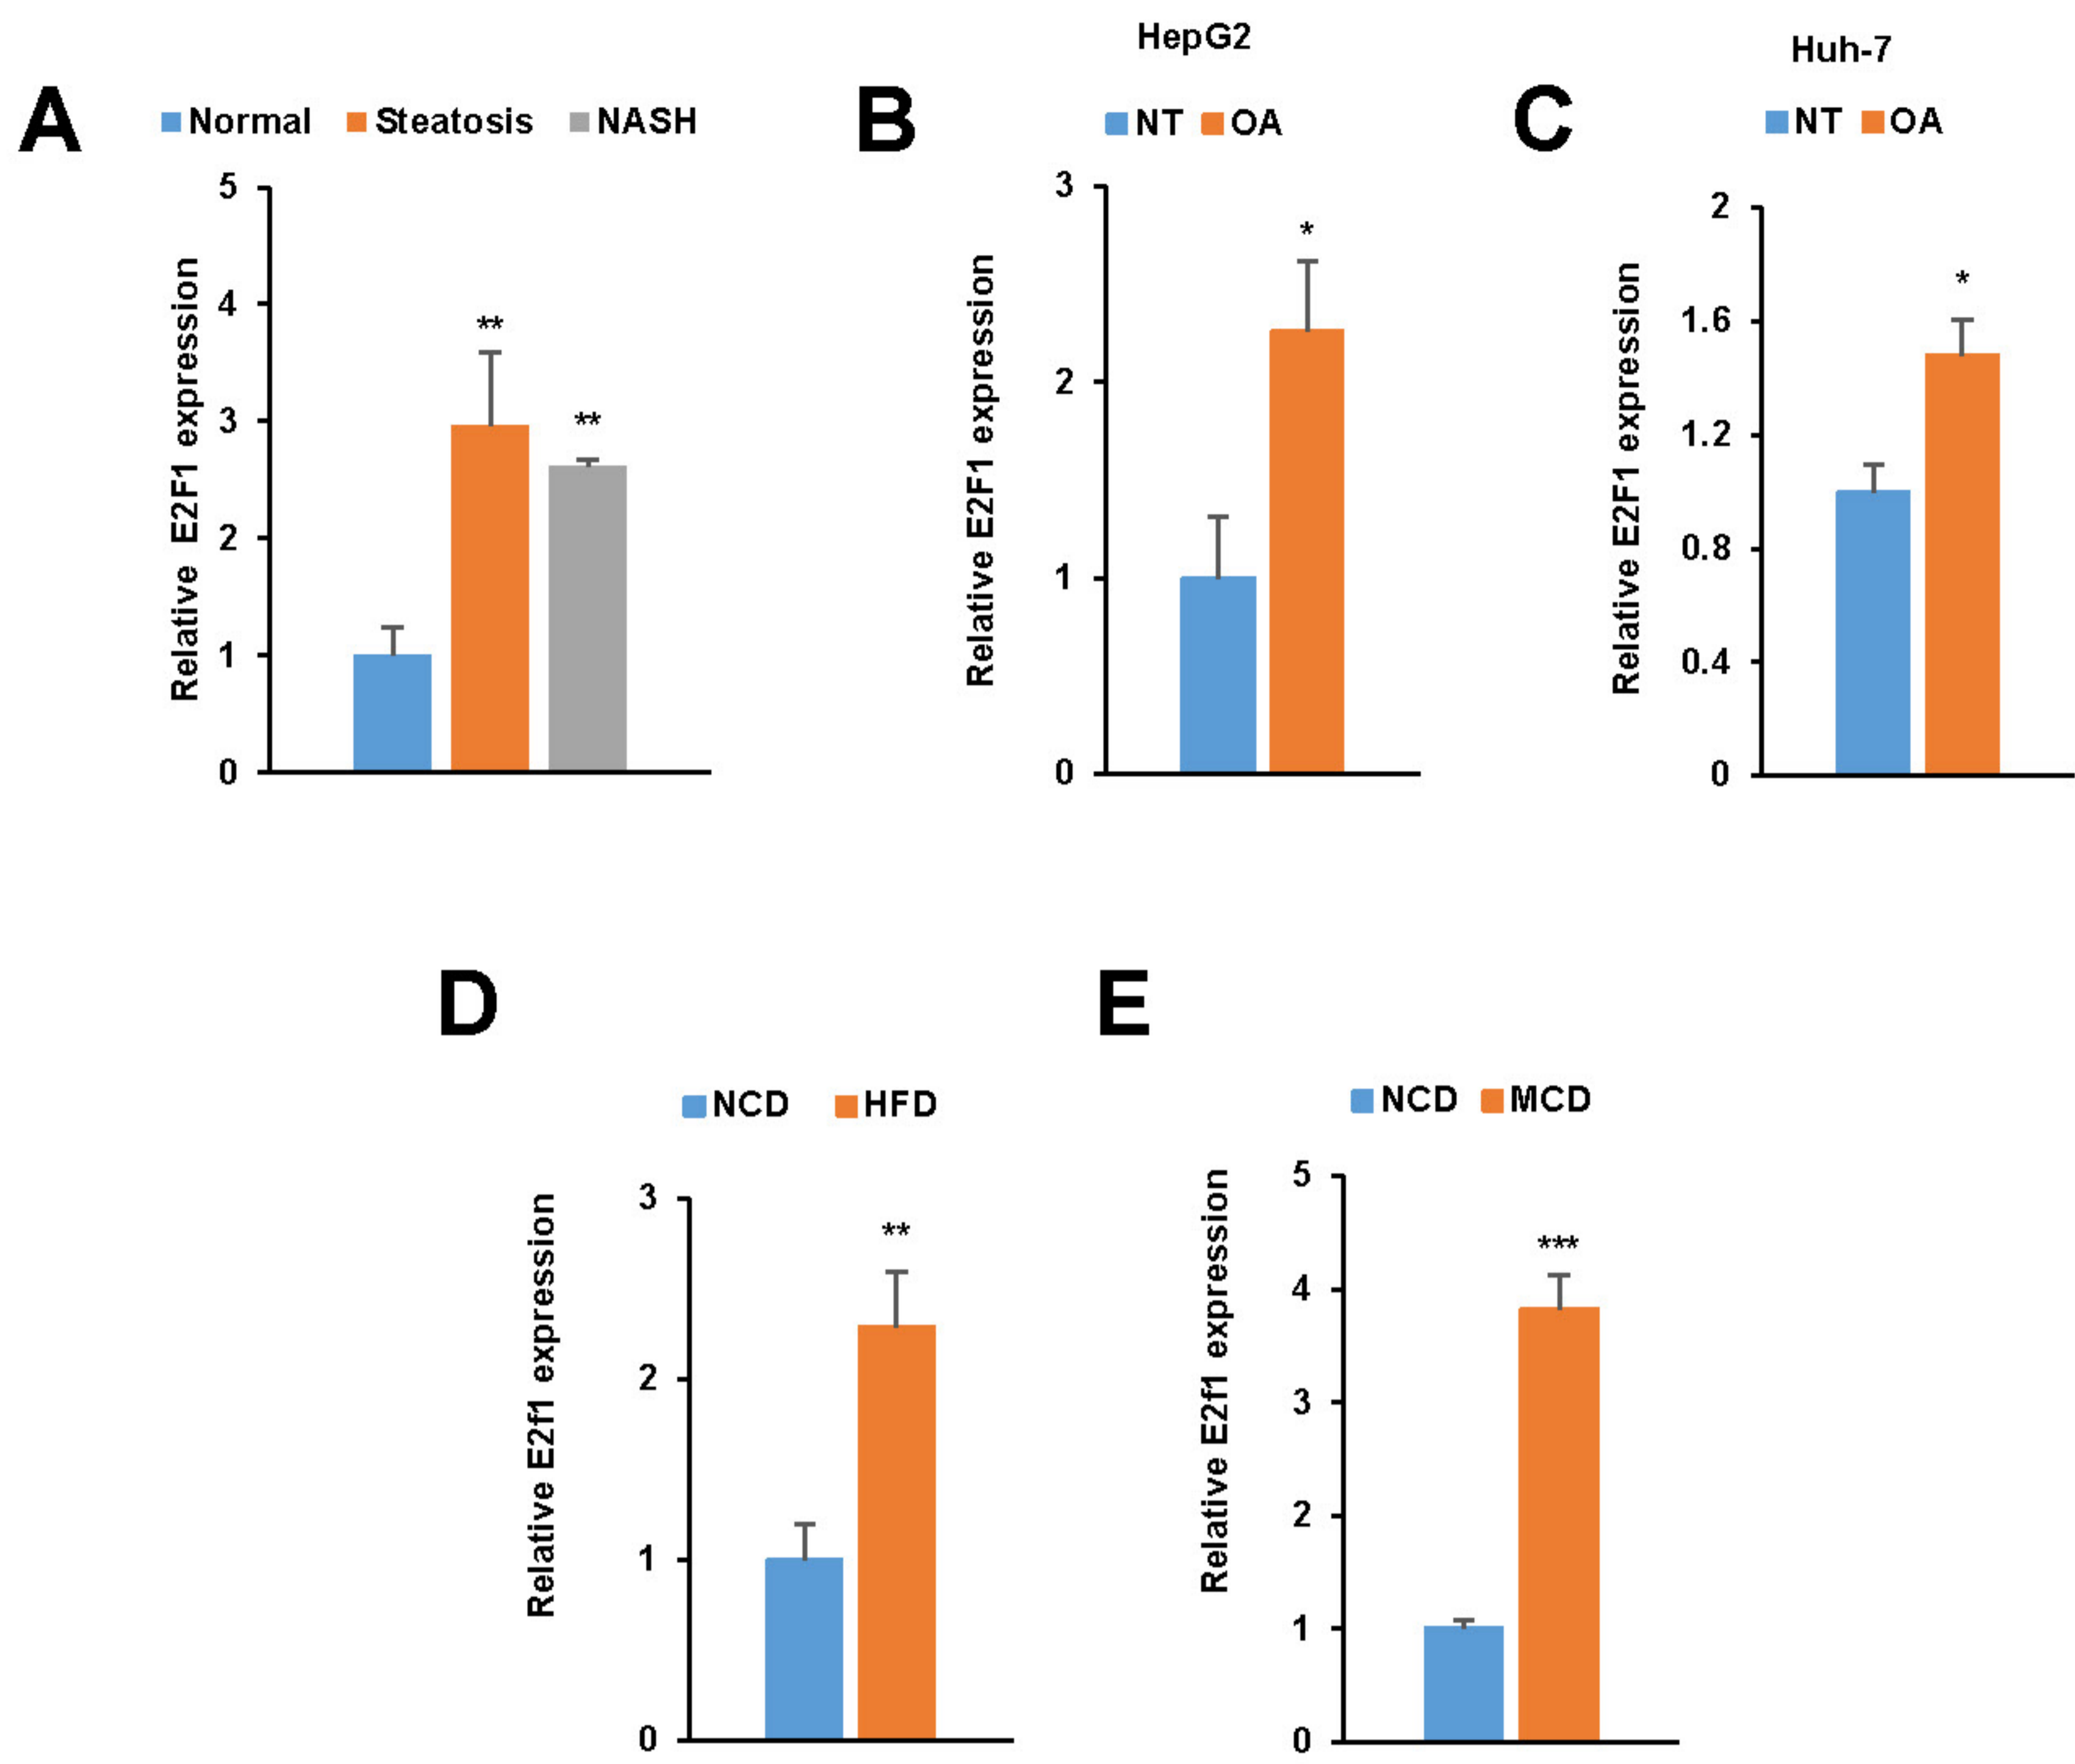

bioRxiv preprint doi: <https://doi.org/10.1101/2021.06.07.447348>; this version posted June 7, 2021. The copyright holder for this preprint (which was not certified by peer review) is the author/funder, who has granted bioRxiv a license to display the preprint in perpetuity. It is made available under aCC-BY 4.0 International license.
